# Supplementary material for: Knowledge, attitude and purchasing behavior of Saudi mothers towards food additives and dietary pattern of preschool children
Source: PeerJ. 2024 Oct 10;12:e18223. doi: 10.7717/peerj.18223 (PMC11471143; doi:10.7717/peerj.18223)
Supplement: Supplemental Information 1 [file peerj-12-18223-s001.xlsx]

## Sheet: Sheet1
timestamp	1- Age of mother:	2-Mother's education level:	3- Marital status of mother:	4- Mother Occupation status:	5- Economic situations:	6- The city you live (in west region):	7- Number of preschool children (from 3 to 5 years):	8-How old is your child? If you have more than one child from 3 to 5 years old, choose the oldest child to answer this survey:	9- Child’s weight in kilograms (kg):	10- Child’s height in centimeters (cm):			11- Does your child suffer from food allergies?	12- Does your child suffer from tooth decay?	1- Have you ever heard about food additives?	2- If you answer yes, what are your sources of information about food additives?	3- Food additives are materials added to processed food to improve the flavor, color, texture and to extend preservation period:	4- The types of additives in foods are preservatives, coloring agents, antioxidants, and emulsifiers:	5- Food factories adhere to certain regulations that are globally specific to the proportions of food additives authorized to be used in their products:	6- Food factories in Saudi Arabia put a clear list of additives in their food products:	7- Do you k0w that the kind of food additives be written in the guidance card on the package and symbolized by the letter E?	8- The numbers after the letter E, such as (E129), symbolize the type of food additive present in the product:	9- Food Additives in processed food products are divided into natural and artificial additives	10- High consumption of artificial food additives may cause hyperactivity for children and other dangerous disease	Total score of mothers’ knowledge toward food additives:	1- Do you allow your child to eat foods that contain food additives?	2- Do you have enough nutritional information to select the suitable food product including food additives?	3- Food containing artificial additives is more attractive for consumers:	4- The approved food additives in food products in Saudi Arabia are safe of health?	5- I am worried for my child to have diseases after consumption food with additives:	6- I am afraid for my child to get allergy after consumption food with additives:	7- Are you willing to pay more money for food without additives?	8- Do you think that it is essential to prepare awareness programs for our community about food additives?	Total score of mothers’ attuited toward food additives:	1- When buying food products for my children, I pay attention to information on food label related to additives as ingredients:	2- I avoid purchasing food products that contain high sweeteners for my children such as canned juices :	3- I avoid purchasing food products that contain high colorings for my children such as lollipops sweet and candies:	4- I avoid purchasing food products that contain high flavors for my children such as potato chips:	5- I avoid purchasing food products that contain monosodium glutamate (MSG) such as instant soup:	6- l am keening to select natural products for my children:	7- My children can choose any food and beverages they want it :	8- I do not consult my children when I buy food:	Total score of mothers purchasing behavior:	Biscuits and crackers (corn and wheat crackers and all kinds of biscuits)	Potato chips (all kinds of chips such as Cheetos, Lays, Doritos, etc.)	Cakes (Pancake, cheesecake, chocolate cake)	Breakfast cereals (all kinds of corn flakes)	Fortified dairy products (yogurt with berries, chocolate milk, etc.)	Chewing gums (Bubble gum, ball gum, etc)
3:34:09 م 2022/04/10	37-41 years old	2	1	1	4,000 – less than 8,000 SR per month	1	1	5 years	27	100	27	Overweight range	No	No	Yes	Social media \ Internet	1	1	1	1	1	1	1	1	8	1	1	0	1	0	0	0	1	4	1	1	1	1	1	1	0	1	7	once or < monthly	once or < monthly	once or < monthly	once or < monthly	once or < monthly	once or < monthly
4:18:10 م 2022/04/10	32-36 years old	5	1	2	8,000 –less than 15,000 SR per month	1	1	5 years	18	108	15.4321	Underweight range	Yes	No	Yes	Family and friends	1	1	1	1	1	1	1	1	8	1	1	1	0	0	0	1	1	5	1	1	1	1	1	1	1	1	8	once weekly	once weekly	once weekly	once or < monthly	once or < monthly	Never
4:34:33 م 2022/04/10	32-36 years old	2	1	3	8,000 –less than 15,000 SR per month	2	2	5 years	13	104	12.0192	Underweight range	No	Yes	No		0	0	0	0	0	0	0	0	0	1	0	1	0	1	1	0	1	5	1	1	1	1	1	1	1	0	7	once weekly	Never	once weekly	once /day	2-3 weekly	Never
4:51:22 م 2022/04/10	18-22 years old	5	1	1	4,000 – less than 8,000 SR per month	3	2	4 years	5	13	Missing data	Missing data	No	No	No		0	1	0	0	1	0	1	1	4	0	0	1	1	1	0	1	0	4	1	0	1	0	1	1	1	1	6	once /day	4-5 /weekly	2-3 weekly	more than once/day	more than once/day	2-3 weekly
4:51:27 م 2022/04/10	18-22 years old	5	1	1	4,000 – less than 8,000 SR per month	3	2	4 years	5	13	Missing data	Missing data	No	No	No		0	1	0	0	1	0	1	1	4	0	0	1	1	1	0	1	0	4	1	0	1	0	1	1	1	1	6	once /day	4-5 /weekly	2-3 weekly	more than once/day	more than once/day	2-3 weekly
4:58:06 م 2022/04/10	37-41 years old	5	1	2	8,000 –less than 15,000 SR per month	1	1	3 years	25	111	20.2906	Healthy weight range	No	No	No		1	0	1	1	1	1	1	1	7	1	1	1	1	0	1	0	1	6	1	0	1	0	1	0	1	1	5	once /day	more than once/day	4-5 /weekly	more than once/day	more than once/day	more than once/day
5:31:33 م 2022/04/10	37-41 years old	4	1	2	4,000 – less than 8,000 SR per month	4	2	5 years	15	60	41.6667	Obesity range	No	Yes	No		1	1	1	1	1	0	1	1	7	1	0	1	0	1	1	1	1	6	1	1	1	1	1	1	0	1	7	once /day	once /day	once /day	4-5 /weekly	once /day	once /day
5:48:54 م 2022/04/10	37-41 years old	4	1	3	8,000 –less than 15,000 SR per month	3	1	3 years	12	55	39.6694	Obesity range	No	No	No		0	0	0	1	0	0	0	0	1	0	0	1	0	0	0	1	1	3	0	1	1	1	1	1	0	1	6	once /day	once /day	more than once/day	4-5 /weekly	2-3 weekly	2-3 weekly
7:47:09 م 2022/04/10	28-31 years old	4	1	3	4,000 – less than 8,000 SR per month	1	1	4 years	15	115	11.3422	Underweight range	No	No	Yes	Ministry of Health \ Food and Drug Administration	1	0	1	1	1	1	1	0	6	0	0	1	0	1	1	1	1	5	1	1	1	1	1	1	1	1	8	4-5 /weekly	2-3 weekly	4-5 /weekly	4-5 /weekly	4-5 /weekly	4-5 /weekly
8:07:00 م 2022/04/10	28-31 years old	4	1	3	Under 4,000 SR per month	1	1	3 years	15	90	18.5185	Healthy weight range	No	No	Yes	Social media \ Internet	1	1	1	1	1	1	0	1	7	0	1	1	0	0	0	1	1	4	1	1	1	1	1	1	0	1	7	2-3 weekly	2-3 weekly	2-3 weekly	once weekly	once weekly	once or < monthly
8:10:06 م 2022/04/10	28-31 years old	4	1	3	8,000 –less than 15,000 SR per month	1	1	3 years	14	77	23.6128	Healthy weight range	I don't no	No	Yes	Social media \ Internet	1	1	0	1	1	0	0	1	5	0	0	1	0	1	1	1	1	5	1	1	1	1	0	0	1	1	6	once /day	once /day	once weekly	once /day	once /day	once weekly
8:12:06 م 2022/04/10	23-27 years old	4	1	3	4,000 – less than 8,000 SR per month	1	1	3 years	8	30	Missing data	Missing data	No	No	No		0	0	0	0	0	0	0	1	1	1	0	0	0	0	0	0	0	1	1	1	1	0	1	1	0	1	6	more than once/day	once /day	once /day	4-5 /weekly	once /day	once /day
8:15:45 م 2022/04/10	Above 46 years old	1	1	3	Under 4,000 SR per month	3	1	3 years	12	60	33.3333	Obesity range	I don't no	No	Yes	Social media \ Internet	0	0	0	1	0	0	1	0	2	1	0	1	0	1	0	1	1	5	1	0	0	0	1	1	0	1	4	4-5 /weekly	4-5 /weekly	once /day	more than once/day	more than once/day	2-3 weekly
8:28:45 م 2022/04/10	28-31 years old	4	2	2	4,000 – less than 8,000 SR per month	4	1	5 years	14	110	11.5702	Underweight range	No	No	Yes	Universities \ schools	1	1	1	1	1	1	1	1	8	1	0	1	0	1	1	1	1	6	1	1	1	1	1	1	0	0	6	more than once/day	once /day	4-5 /weekly	more than once/day	4-5 /weekly	once weekly
8:44:42 م 2022/04/10	37-41 years old	4	1	3	4,000 – less than 8,000 SR per month	4	1	5 years	16	70	32.6531	Obesity range	No	No	Yes	Ministry of Health \ Food and Drug Administration	1	1	0	1	1	1	0	1	6	1	1	1	1	0	0	1	1	6	1	1	1	1	1	1	0	1	7	once weekly	once or < monthly	once or < monthly	once or < monthly	once or < monthly	Never
8:47:42 م 2022/04/10	28-31 years old	4	1	3	4,000 – less than 8,000 SR per month	1	1	3 years	15	130	8.87574	Underweight range	No	No	No		1	1	0	0	0	0	0	0	2	1	0	0	0	1	1	1	1	5	1	1	1	1	1	1	1	1	8	once /day	once /day	once /day	once /day	more than once/day	more than once/day
9:24:21 م 2022/04/10	32-36 years old	4	1	3	4,000 – less than 8,000 SR per month	1	1	4 years	14	110	11.5702	Underweight range	Yes	Yes	Yes	Social media \ Internet	1	1	1	1	1	0	1	1	7	1	1	1	0	1	1	1	1	7	1	1	1	1	1	1	0	1	7	once weekly	once weekly	once weekly	once weekly	once weekly	4-5 /weekly
10:02:37 م 2022/04/10	18-22 years old	2	1	3	4,000 – less than 8,000 SR per month	1	1	3 years	10	90	12.3457	Underweight range	No	No	No		0	0	0	1	1	0	0	0	2	0	0	0	1	0	0	0	0	1	0	1	1	1	0	1	1	1	6	once /day	once /day	once /day	once /day	once /day	Never
10:48:00 م 2022/04/10	23-27 years old	3	1	2	8,000 –less than 15,000 SR per month	1	3	5 years	20	30	Missing data	Missing data	Yes	Yes	No		1	1	1	1	0	1	1	1	7	0	0	0	1	1	1	1	1	5	1	0	1	0	0	1	0	1	4	more than once/day	more than once/day	more than once/day	more than once/day	more than once/day	more than once/day
1:57:43 ص 2022/04/11	32-36 years old	4	1	1	8,000 –less than 15,000 SR per month	1	2	4 years	14	100	14	Underweight range	No	No	Yes	Universities \ schools	1	1	1	1	1	1	1	1	8	0	0	0	0	0	0	0	1	1	0	1	1	1	1	1	0	1	6	once weekly	once or < monthly	2-3 weekly	2-3 weekly	once weekly	once weekly
2:04:29 ص 2022/04/11	42-46 years old	4	1	2	8,000 –less than 15,000 SR per month	4	2	4 years	14	43	75.7166	Obesity range	No	Yes	No		0	0	0	0	0	0	0	0	0	0	0	0	0	0	0	0	0	0	0	0	0	0	0	0	0	1	1	4-5 /weekly	once /day	4-5 /weekly	once /day	4-5 /weekly	2-3 weekly
8:48:48 ص 2022/04/11	42-46 years old	4	1	2	15,000 – less than 25,000 SR per month	4	2	4 years	14	60	38.8889	Obesity range	I don't no	No	Yes	TV/radio	1	1	1	1	1	1	1	1	8	0	0	0	1	0	0	1	1	3	1	1	1	1	1	1	1	0	7	once or < monthly	once or < monthly	once weekly	once weekly	once weekly	once or < monthly
12:10:49 م 2022/04/11	28-31 years old	4	1	2	8,000 –less than 15,000 SR per month	1	1	5 years	25	I don't no	Missing data	Missing data	No	No	No		1	1	1	1	0	0	0	1	5	1	0	1	0	1	1	1	1	6	1	1	1	1	1	1	1	1	8	2-3 weekly	once weekly	2-3 weekly	2-3 weekly	2-3 weekly	once /day
1:30:43 م 2022/04/11	28-31 years old	4	1	3	Above 25,000 SR per month	1	2	5 years	20	112	15.9439	Underweight range	No	No	Yes	Social media \ Internet	1	1	0	0	1	1	1	1	6	0	1	0	0	1	1	1	1	5	1	1	1	1	1	1	1	1	8	once weekly	2-3 weekly	once or < monthly	once weekly	Never	Never
11:05:09 م 2022/04/11	37-41 years old	5	1	2	Above 25,000 SR per month	1	1	4 years	17	100	17	Underweight range	No	No	Yes	Universities \ schools	1	1	1	1	1	1	1	1	8	1	1	1	1	0	0	1	1	6	1	1	1	1	1	1	0	0	6	2-3 weekly	once weekly	4-5 /weekly	once or < monthly	Never	Never
11:08:14 م 2022/04/11	23-27 years old	2	1	3	8,000 –less than 15,000 SR per month	1	2	5 years	16	98	16.6597	Underweight range	No	No	Yes	Social media \ Internet	1	1	1	1	1	1	1	1	8	1	1	1	1	0	0	0	1	5	1	1	1	0	1	1	1	1	7	once /day	once or < monthly	once /day	Never	once /day	Never
2:13:24 ص 2022/04/12	37-41 years old	2	1	3	4,000 – less than 8,000 SR per month	1	1	5 years	17	112	13.5523	Underweight range	Yes	No	Yes	Social media \ Internet	1	0	1	1	1	1	1	1	7	0	1	1	0	1	1	1	1	6	1	1	1	1	1	1	0	1	7	2-3 weekly	once weekly	once or < monthly	once or < monthly	once or < monthly	Never
11:06:54 ص 2022/04/17	32-36 years old	4	1	2	8,000 –less than 15,000 SR per month	5	3	3 years	0	0	Missing data	Missing data	No	No	No		0	0	1	1	0	1	1	1	5	0	1	1	1	1	1	1	1	7	1	1	1	1	1	1	0	1	7	2-3 weekly	2-3 weekly	once or < monthly	4-5 /weekly	once weekly	2-3 weekly
11:16:17 ص 2022/04/17	28-31 years old	5	1	2	15,000 – less than 25,000 SR per month	1	2	5 years	17.4	110	14.3802	Underweight range	No	No	Yes	Social media \ Internet	1	1	1	1	1	1	0	1	7	0	0	1	0	0	0	1	1	3	1	1	1	1	1	1	1	1	8	once weekly	once or < monthly	once weekly	2-3 weekly	once /day	Never
12:38:55 م 2022/04/17	42-46 years old	4	1	2	4,000 – less than 8,000 SR per month	1	1	5 years	18	50	72	Obesity range	No	No	No		0	0	0	0	0	0	0	0	0	1	0	0	0	1	1	0	1	4	0	0	0	1	0	1	0	1	3	once or < monthly	once weekly	once weekly	once weekly	4-5 /weekly	Never
3:18:35 م 2022/04/17	42-46 years old	4	2	2	15,000 – less than 25,000 SR per month	1	1	5 years	12	100	12	Underweight range	No	No	Yes	Social media \ Internet	1	1	1	1	1	1	0	1	7	0	1	0	0	1	0	1	1	4	1	1	1	1	1	1	0	1	7	once or < monthly	once weekly	Never	Never	Never	Never
3:25:13 م 2022/04/17	28-31 years old	5	1	4	15,000 – less than 25,000 SR per month	4	1	3 years	17	100	17	Underweight range	Yes	No	Yes	Social media \ Internet	1	1	1	0	1	1	0	1	6	1	1	1	0	0	0	1	1	5	1	1	1	1	1	1	1	1	8	Never	Never	Never	Never	Never	Never
3:28:17 م 2022/04/17	28-31 years old	5	1	3	4,000 – less than 8,000 SR per month	1	1	3 years	15	95	16.6205	Underweight range	No	No	Yes	Family and friends	1	0	0	0	0	0	0	0	1	0	0	0	0	1	0	1	1	3	1	1	1	1	1	1	1	1	8	2-3 weekly	once or < monthly	once /day	4-5 /weekly	more than once/day	once or < monthly
8:28:39 م 2022/04/17	37-41 years old	5	2	3	Under 4,000 SR per month	1	1	3 years	13	90	16.0494	Underweight range	I don't no	No	Yes	Universities \ schools	1	1	1	1	1	0	1	1	7	0	0	0	1	0	0	0	1	2	1	0	1	1	1	1	0	1	6	more than once/day	Never	more than once/day	Never	more than once/day	Never
1:07:30 م 2022/04/18	32-36 years old	4	1	2	4,000 – less than 8,000 SR per month	1	2	4 years	16	110	13.2231	Underweight range	Yes	No	No		0	0	0	0	0	0	1	1	2	0	0	0	0	0	0	0	1	1	0	0	1	1	1	1	1	1	6	more than once/day	once /day	once weekly	Never	Never	once or < monthly
6:35:44 ص 2022/04/24	37-41 years old	4	1	2	4,000 – less than 8,000 SR per month	1	1	5 years	12	0	Missing data	Missing data	No	Yes	Yes	Family and friends	1	0	0	1	0	0	1	1	4	1	0	1	0	1	1	1	1	6	1	1	1	1	1	1	1	0	7	more than once/day	once /day	once /day	more than once/day	more than once/day	once /day
3:54:52 م 2022/05/15	32-36 years old	3	2	2	4,000 – less than 8,000 SR per month	2	2	5 years	18.4	109.2	15.4302	Underweight range	No	No	Yes	Family and friends	1	1	1	1	1	1	1	0	7	1	1	1	1	0	1	1	1	7	1	1	1	1	1	1	0	1	7	once /day	2-3 weekly	4-5 /weekly	4-5 /weekly	once /day	4-5 /weekly
4:36:22 م 2022/05/15	23-27 years old	2	1	3	8,000 –less than 15,000 SR per month	2	2	5 years	14	50	56	Obesity range	No	No	No		1	0	1	1	0	0	1	1	5	0	0	0	1	0	0	1	1	3	1	1	1	1	1	1	1	1	8	once weekly	once weekly	once weekly	once or < monthly	once weekly	Never
5:08:43 م 2022/05/15	28-31 years old	4	1	1	8,000 –less than 15,000 SR per month	2	1	5 years	15	104	13.8683	Underweight range	No	No	Yes	Social media \ Internet	1	1	0	1	1	1	1	1	7	1	0	1	0	0	0	1	1	4	1	1	1	1	1	1	1	1	8	once /day	once /day	once /day	once /day	more than once/day	once /day
6:09:43 م 2022/05/15	42-46 years old	2	1	3	8,000 –less than 15,000 SR per month	3	3	3 years	13	55	42.9752	Obesity range	Yes	No	No		0	0	0	0	0	0	1	0	1	1	0	1	1	0	1	1	1	6	1	1	1	1	1	1	0	1	7	more than once/day	more than once/day	once weekly	more than once/day	more than once/day	Never
6:16:59 م 2022/05/15	37-41 years old	4	1	2	Above 25,000 SR per month	1	1	3 years	13.5	112	10.7621	Underweight range	Yes	No	No		0	0	0	1	1	0	0	0	2	1	0	1	0	1	1	1	1	6	1	1	1	1	1	1	0	1	7	once /day	once /day	2-3 weekly	once /day	Never	Never
6:30:34 م 2022/05/15	Above 46 years old	4	1	5	8,000 –less than 15,000 SR per month	3	more than 3	3 years	11	15	Missing data	Missing data	No	Yes	Yes	Social media \ Internet	1	1	1	1	1	1	0	1	7	1	0	1	1	1	1	1	1	7	1	1	1	1	1	1	1	1	8	once /day	once /day	once /day	once /day	4-5 /weekly	once /day
6:38:30 م 2022/05/15	28-31 years old	4	1	3	15,000 – less than 25,000 SR per month	3	1	3 years	20	50	80	Obesity range	Yes	No	Yes	Social media \ Internet	1	1	1	1	1	1	0	1	7	0	1	1	1	0	1	1	1	6	1	1	1	1	1	1	1	1	8	more than once/day	4-5 /weekly	more than once/day	4-5 /weekly	4-5 /weekly	more than once/day
7:43:17 م 2022/05/15	32-36 years old	4	1	3	4,000 – less than 8,000 SR per month	3	1	4 years	17	70	34.6939	Obesity range	No	No	No		0	0	0	0	1	1	1	1	4	0	0	1	0	1	1	0	1	4	0	1	1	1	1	1	0	1	6	once /day	2-3 weekly	4-5 /weekly	4-5 /weekly	once /day	2-3 weekly
8:25:13 م 2022/05/15	23-27 years old	4	1	3	15,000 – less than 25,000 SR per month	1	1	3 years	15	I don't no	Missing data	Missing data	No	No	No		0	1	1	1	1	1	1	1	7	1	0	0	0	0	0	1	1	3	1	1	1	1	1	1	1	1	8	2-3 weekly	2-3 weekly	once /day	once /day	2-3 weekly	2-3 weekly
9:03:21 م 2022/05/15	37-41 years old	2	3	3	8,000 –less than 15,000 SR per month	1	1	3 years	16	100	16	Underweight range	I don't no	No	Yes	Social media \ Internet	0	1	0	1	0	0	0	0	2	1	1	1	1	0	0	0	1	5	1	1	0	1	0	1	1	0	5	2-3 weekly	once weekly	2-3 weekly	once /day	more than once/day	once weekly
11:59:01 م 2022/05/15	28-31 years old	3	1	2	Under 4,000 SR per month	3	1	5 years	18	23	Missing data	Missing data	No	Yes	No		1	1	1	1	0	0	1	1	6	0	0	1	0	1	1	0	1	4	0	0	1	1	1	1	0	1	5	more than once/day	2-3 weekly	more than once/day	2-3 weekly	once /day	once /day
4:20:13 ص 2022/05/16	Above 46 years old	2	1	3	8,000 –less than 15,000 SR per month	3	more than 3	5 years	13	100	13	Underweight range	I don't no	No	No		0	0	0	0	0	0	0	1	1	1	0	1	0	1	1	0	1	5	1	1	1	1	0	1	0	1	6	4-5 /weekly	once /day	4-5 /weekly	once /day	4-5 /weekly	4-5 /weekly
12:54:53 ص 2022/05/18	Above 46 years old	1	1	3	Under 4,000 SR per month	3	more than 3	5 years	10	58	29.7265	Overweight range	No	No	No		0	0	1	1	0	0	1	1	4	0	0	0	0	1	1	0	1	3	0	0	1	1	1	0	0	1	4	more than once/day	4-5 /weekly	once /day	4-5 /weekly	more than once/day	2-3 weekly
1:08:58 ص 2022/05/18	28-31 years old	4	1	3	4,000 – less than 8,000 SR per month	3	1	3 years	12	60	33.3333	Obesity range	No	No	No		0	0	1	1	0	0	1	1	4	1	0	1	0	0	0	0	1	3	0	1	1	1	1	1	1	1	7	once weekly	once or < monthly	once or < monthly	2-3 weekly	2-3 weekly	Never
1:11:24 ص 2022/05/18	Above 46 years old	1	1	3	Under 4,000 SR per month	3	1	3 years	21	122	14.1091	Underweight range	I don't no	No	No		0	1	0	0	0	0	0	0	1	0	0	0	0	0	0	0	0	0	0	0	0	0	0	0	1	0	1	once /day	more than once/day	more than once/day	more than once/day	more than once/day	4-5 /weekly
1:15:38 ص 2022/05/18	32-36 years old	1	1	3	Under 4,000 SR per month	1	1	4 years	13	54	44.5816	Obesity range	No	No	Yes	Social media \ Internet	1	0	1	1	1	0	1	1	6	0	0	1	1	0	0	1	1	4	1	1	0	1	1	1	0	0	5	once /day	once /day	once /day	once /day	more than once/day	once /day
1:20:33 ص 2022/05/18	37-41 years old	2	1	3	15,000 – less than 25,000 SR per month	3	1	3 years	30	134	16.7075	Underweight range	No	No	Yes	Family and friends	0	0	0	0	0	0	0	0	0	0	0	0	0	0	0	0	0	0	0	0	0	0	0	0	1	0	1	once /day	once /day	once /day	once /day	once /day	once /day
1:27:03 ص 2022/05/18	23-27 years old	4	1	1	15,000 – less than 25,000 SR per month	4	2	5 years	12	100	12	Underweight range	No	No	Yes	Social media \ Internet	1	1	1	1	0	0	0	1	5	1	1	0	1	0	0	0	1	4	1	1	1	1	1	1	1	1	8	2-3 weekly	once or < monthly	4-5 /weekly	once /day	once or < monthly	Never
1:30:57 ص 2022/05/18	18-22 years old	3	1	2	Above 25,000 SR per month	1	1	3 years	26	122	17.4684	Underweight range	No	No	No		0	1	0	1	1	1	1	1	6	0	1	0	1	1	1	1	1	6	1	1	1	1	1	1	0	1	7	more than once/day	more than once/day	once /day	more than once/day	more than once/day	more than once/day
1:31:04 ص 2022/05/18	18-22 years old	4	1	3	8,000 –less than 15,000 SR per month	3	3	4 years	25	100	25	Healthy weight range	No	No	Yes	Family and friends	1	1	1	1	1	1	1	1	8	0	1	1	1	1	1	1	1	7	0	0	1	0	0	1	0	0	2	more than once/day	once /day	more than once/day	once /day	more than once/day	once /day
5:42:28 ص 2022/05/18	42-46 years old	2	1	2	4,000 – less than 8,000 SR per month	1	1	5 years	25	120	17.3611	Underweight range	No	No	Yes	Ministry of Health \ Food and Drug Administration	1	0	1	0	1	1	1	1	6	0	1	1	1	1	1	1	1	7	1	1	1	1	1	1	0	0	6	once /day	once /day	once /day	once /day	once /day	more than once/day
10:07:02 ص 2022/05/18	23-27 years old	4	1	4	Under 4,000 SR per month	6	1	4 years	20	50	80	Obesity range	No	No	Yes	TV/radio	0	0	0	0	0	0	0	0	0	0	0	0	0	0	0	0	0	0	0	1	1	1	0	1	1	0	5	more than once/day	4-5 /weekly	2-3 weekly	more than once/day	2-3 weekly	4-5 /weekly
11:21:08 ص 2022/05/18	18-22 years old	4	1	2	4,000 – less than 8,000 SR per month	1	1	3 years	22	42	Missing data	Missing data	No	I don't no	Yes	Family and friends	1	1	0	1	0	1	1	0	5	0	1	1	0	0	1	1	0	4	0	1	1	1	1	1	0	1	6	4-5 /weekly	4-5 /weekly	4-5 /weekly	once /day	once /day	2-3 weekly
12:35:30 م 2022/05/18	28-31 years old	5	1	4	Under 4,000 SR per month	3	2	5 years	13.5	110	11.157	Underweight range	No	Yes	Yes	Universities \ schools	1	1	1	1	1	1	1	1	8	1	0	1	1	1	1	0	1	6	1	1	1	1	1	1	0	1	7	once or < monthly	Never	4-5 /weekly	Never	Never	Never
11:51:26 م 2022/05/18	37-41 years old	4	2	2	8,000 –less than 15,000 SR per month	4	1	5 years	15	I don't no	Missing data	Missing data	No	No	No		1	1	1	1	1	1	1	1	8	0	1	1	0	1	0	0	1	4	1	1	1	0	1	1	1	1	7	once /day	4-5 /weekly	4-5 /weekly	2-3 weekly	2-3 weekly	once or < monthly
8:27:48 ص 2022/05/19	32-36 years old	5	3	2	4,000 – less than 8,000 SR per month	3	2	5 years	12	130	7.10059	Underweight range	No	Yes	Yes	Ministry of Health \ Food and Drug Administration	0	1	1	1	0	0	0	1	4	0	1	0	0	0	1	1	0	3	1	1	1	1	1	1	0	0	6	once /day	once /day	once /day	once /day	more than once/day	once /day
7:47:53 م 2022/05/21	32-36 years old	2	1	3	Above 25,000 SR per month	1	more than 3	4 years	14	120	9.72222	Underweight range	No	No	Yes	Social media \ Internet	1	1	1	1	0	0	1	1	6	0	0	1	0	1	1	0	1	4	1	1	0	1	0	1	0	1	5	4-5 /weekly	4-5 /weekly	2-3 weekly	once /day	once /day	once /day
10:44:29 ص 2022/05/22	37-41 years old	2	1	3	8,000 –less than 15,000 SR per month	1	1	5 years	29	127	17.98	Underweight range	No	Yes	Yes	TV/radio	1	1	0	1	1	1	1	1	7	1	0	1	0	0	1	1	1	5	0	1	1	0	1	1	1	1	6	4-5 /weekly	once /day	4-5 /weekly	more than once/day	4-5 /weekly	4-5 /weekly
1:05:35 م 2022/05/22	32-36 years old	5	1	4	15,000 – less than 25,000 SR per month	1	1	3 years	12	100	12	Underweight range	No	No	No		0	0	1	0	0	0	0	1	2	1	0	1	0	0	0	1	1	4	1	1	1	1	0	1	1	1	7	once or < monthly	once or < monthly	4-5 /weekly	Never	once /day	Never
4:45:39 م 2022/05/22	28-31 years old	2	1	2	4,000 – less than 8,000 SR per month	1	1	3 years	13	95	14.4044	Underweight range	Yes	No	Yes	Ministry of Health \ Food and Drug Administration	1	1	1	0	1	1	1	1	7	1	0	1	0	1	1	1	1	6	1	1	1	1	1	1	1	1	8	2-3 weekly	2-3 weekly	Never	once /day	more than once/day	Never
4:45:42 م 2022/05/22	28-31 years old	2	1	2	4,000 – less than 8,000 SR per month	1	1	3 years	13	95	14.4044	Underweight range	Yes	No	Yes	Ministry of Health \ Food and Drug Administration	1	1	1	0	1	1	1	1	7	1	0	1	0	1	1	1	1	6	1	1	1	1	1	1	1	1	8	2-3 weekly	2-3 weekly	Never	once /day	more than once/day	Never
2:23:25 م 2022/08/17	Above 46 years old	1	1	3	Under 4,000 SR per month	3	more than 3	5 years	30	90	37.037	Obesity range	No	Yes	No		0	0	0	1	0	0	0	0	1	1	0	1	0	0	0	0	1	3	0	0	1	0	0	1	0	0	2	2-3 weekly	once /day	2-3 weekly	once or < monthly	2-3 weekly	more than once/day
2:32:48 م 2022/08/17	32-36 years old	4	1	3	4,000 – less than 8,000 SR per month	1	2	5 years	14	110	11.5702	Underweight range	Yes	Yes	No		0	1	1	1	0	0	1	1	5	1	1	1	1	1	1	1	1	8	1	1	1	1	0	1	1	1	7	once weekly	once weekly	once weekly	once weekly	once weekly	once weekly
2:52:06 م 2022/08/17	28-31 years old	2	1	3	Under 4,000 SR per month	1	1	3 years	11	300	Missing data	Missing data	No	Yes	No		1	1	1	1	1	0	0	1	6	1	0	1	1	1	1	0	0	5	1	1	1	1	1	1	0	1	7	more than once/day	more than once/day	once /day	once /day	more than once/day	4-5 /weekly
3:06:37 م 2022/08/17	32-36 years old	4	1	2	8,000 –less than 15,000 SR per month	1	1	5 years	19	110	15.7025	Underweight range	No	Yes	Yes	Ministry of Health \ Food and Drug Administration	1	1	1	1	1	1	1	1	8	1	1	1	1	0	0	0	1	5	1	1	1	1	1	1	1	0	7	4-5 /weekly	once weekly	once /day	once /day	once /day	2-3 weekly
3:34:57 م 2022/08/17	23-27 years old	3	1	4	4,000 – less than 8,000 SR per month	1	3	5 years	17	126	10.708	Underweight range	I don't no	No	Yes	Ministry of Health \ Food and Drug Administration	1	1	0	0	0	0	1	0	3	1	0	0	0	1	1	1	1	5	1	1	1	1	1	1	0	0	6	more than once/day	more than once/day	more than once/day	once /day	more than once/day	more than once/day
3:46:21 م 2022/08/17	37-41 years old	4	1	3	8,000 –less than 15,000 SR per month	1	1	5 years	20	100	20	Healthy weight range	No	Yes	Yes	Ministry of Health \ Food and Drug Administration	1	1	1	1	0	0	1	1	6	0	1	0	0	0	1	0	1	3	1	1	1	1	1	1	1	1	8	2-3 weekly	once weekly	once weekly	once weekly	2-3 weekly	once or < monthly
3:48:34 م 2022/08/17	42-46 years old	3	1	2	Under 4,000 SR per month	3	more than 3	5 years	30	130	17.7515	Underweight range	No	No	Yes	Social media \ Internet	1	1	1	1	1	1	1	1	8	1	0	1	0	1	1	1	1	6	1	1	1	1	1	1	1	0	7	once or < monthly	Never	once weekly	once or < monthly	once or < monthly	once or < monthly
3:57:19 م 2022/08/17	37-41 years old	3	1	2	4,000 – less than 8,000 SR per month	1	more than 3	5 years	20	85	27.6817	Overweight range	No	No	Yes	Social media \ Internet	1	1	1	1	1	1	1	1	8	1	0	1	0	0	0	1	1	4	1	1	1	1	1	1	1	1	8	2-3 weekly	2-3 weekly	2-3 weekly	4-5 /weekly	4-5 /weekly	once weekly
3:59:17 م 2022/08/17	28-31 years old	4	1	3	8,000 –less than 15,000 SR per month	1	2	5 years	16	I don't no	Missing data	Missing data	Yes	Yes	No		1	1	1	1	1	1	1	1	8	0	1	1	1	1	1	1	1	7	1	1	1	1	1	1	0	1	7	once weekly	once weekly	once weekly	once weekly	once weekly	once weekly
4:03:43 م 2022/08/17	37-41 years old	4	1	2	8,000 –less than 15,000 SR per month	3	more than 3	5 years	15	0	Missing data	Missing data	No	No	No		1	1	1	1	0	0	1	1	6	0	0	0	0	0	0	0	1	1	0	1	1	0	1	1	0	0	4	2-3 weekly	2-3 weekly	2-3 weekly	once /day	once weekly	2-3 weekly
4:25:53 م 2022/08/17	28-31 years old	4	1	3	Under 4,000 SR per month	3	1	4 years	13	93	15.0306	Underweight range	No	No	Yes	Social media \ Internet	1	1	1	1	1	1	1	1	8	0	0	1	0	1	0	1	1	4	1	1	1	1	1	1	0	1	7	once weekly	once weekly	once weekly	2-3 weekly	2-3 weekly	once or < monthly
4:54:20 م 2022/08/17	37-41 years old	4	1	2	8,000 –less than 15,000 SR per month	1	3	3 years	12	15	Missing data	Missing data	No	No	Yes	Ministry of Health \ Food and Drug Administration	1	1	1	1	0	0	1	0	5	0	0	1	0	0	0	0	0	1	0	1	1	1	1	1	1	0	6	2-3 weekly	once weekly	2-3 weekly	2-3 weekly	4-5 /weekly	once weekly
4:58:26 م 2022/08/17	Above 46 years old	2	1	3	4,000 – less than 8,000 SR per month	1	more than 3	5 years	8	120	5.55556	Underweight range	No	Yes	No		0	0	0	1	1	1	0	1	4	0	0	1	0	0	0	0	0	1	0	1	1	0	0	1	0	1	4	4-5 /weekly	4-5 /weekly	4-5 /weekly	once or < monthly	4-5 /weekly	4-5 /weekly
5:01:42 م 2022/08/17	37-41 years old	4	1	3	4,000 – less than 8,000 SR per month	1	1	4 years	14.3	99	14.5903	Underweight range	No	Yes	No		0	0	0	1	0	0	0	0	1	0	0	1	1	0	0	0	1	3	0	1	1	1	1	1	0	1	6	2-3 weekly	2-3 weekly	once weekly	Never	once or < monthly	Never
5:12:38 م 2022/08/17	23-27 years old	2	1	2	8,000 –less than 15,000 SR per month	1	1	4 years	35	70	71.4286	Obesity range	No	Yes	No		0	1	0	1	1	1	1	1	6	0	1	1	1	1	1	1	1	7	1	1	1	1	1	1	0	1	7	once weekly	2-3 weekly	once weekly	4-5 /weekly	2-3 weekly	4-5 /weekly
5:33:19 م 2022/08/17	37-41 years old	4	1	2	4,000 – less than 8,000 SR per month	1	1	3 years	20	70	40.8163	Obesity range	No	No	No		1	1	0	1	0	0	1	1	5	0	0	1	0	0	0	1	1	3	1	1	1	1	1	1	0	1	7	once /day	once /day	4-5 /weekly	once /day	more than once/day	2-3 weekly
5:58:42 م 2022/08/17	37-41 years old	4	1	2	8,000 –less than 15,000 SR per month	3	1	3 years	16	60	44.4444	Obesity range	No	No	Yes	Social media \ Internet	1	1	1	1	1	1	1	1	8	0	0	1	0	1	0	0	1	3	1	1	1	1	1	1	1	1	8	2-3 weekly	2-3 weekly	2-3 weekly	4-5 /weekly	2-3 weekly	2-3 weekly
6:20:09 م 2022/08/17	Above 46 years old	4	1	2	15,000 – less than 25,000 SR per month	3	1	4 years	13	32	Missing data	Missing data	No	Yes	No		0	0	0	0	0	0	0	0	0	1	0	0	0	0	1	0	1	3	0	1	1	1	1	1	0	1	6	2-3 weekly	once weekly	once /day	more than once/day	more than once/day	Never
6:23:34 م 2022/08/17	28-31 years old	4	1	3	8,000 –less than 15,000 SR per month	3	1	3 years	14	70	28.5714	Overweight range	No	No	No		0	0	0	0	0	0	0	0	0	1	0	0	0	0	0	0	1	2	0	0	1	0	0	1	0	1	3	once /day	once /day	once /day	once /day	once /day	once /day
7:44:48 م 2022/08/17	28-31 years old	4	1	3	4,000 – less than 8,000 SR per month	3	more than 3	3 years	4	15	Missing data	Missing data	No	No	Yes	Ministry of Health \ Food and Drug Administration	1	1	1	1	1	1	1	1	8	0	1	1	1	1	1	1	1	7	1	1	1	1	1	1	0	1	7	more than once/day	more than once/day	more than once/day	more than once/day	more than once/day	more than once/day
7:47:14 م 2022/08/17	28-31 years old	4	1	3	4,000 – less than 8,000 SR per month	3	more than 3	3 years	5	15	Missing data	Missing data	Yes	Yes	Yes	Ministry of Health \ Food and Drug Administration	1	1	1	1	1	1	1	1	8	0	1	1	1	1	1	1	1	7	1	1	1	1	1	1	0	1	7	more than once/day	more than once/day	more than once/day	more than once/day	more than once/day	more than once/day
8:31:25 م 2022/08/17	23-27 years old	3	1	4	4,000 – less than 8,000 SR per month	1	1	5 years	18	I don't no	Missing data	Missing data	No	No	No		0	0	0	0	0	0	0	1	1	1	1	1	0	1	1	1	1	7	1	1	1	1	1	1	1	0	7	once weekly	once weekly	once weekly	once /day	more than once/day	once weekly
8:43:21 م 2022/08/17	18-22 years old	4	1	2	Under 4,000 SR per month	3	1	3 years	30	125	19.2	Healthy weight range	No	No	Yes	Social media \ Internet	1	0	1	1	0	1	1	0	5	1	1	0	0	1	1	1	1	6	1	1	0	0	0	1	1	1	5	4-5 /weekly	2-3 weekly	2-3 weekly	4-5 /weekly	once /day	once weekly
8:50:03 م 2022/08/17	32-36 years old	4	1	3	4,000 – less than 8,000 SR per month	3	1	4 years	15	95	16.6205	Underweight range	No	Yes	Yes	Social media \ Internet	1	1	1	1	0	0	1	0	5	0	0	0	1	0	0	0	1	2	1	0	0	0	0	1	0	1	3	once /day	once /day	once /day	once /day	once /day	2-3 weekly
8:52:50 م 2022/08/17	28-31 years old	1	1	3	Under 4,000 SR per month	1	1	5 years	13	105	11.7914	Underweight range	Yes	No	Yes	Ministry of Health \ Food and Drug Administration	1	1	1	1	0	0	1	1	6	0	1	0	0	1	1	1	1	5	1	1	1	0	0	1	0	1	5	more than once/day	once /day	more than once/day	once /day	more than once/day	more than once/day
9:24:09 م 2022/08/17	Above 46 years old	4	1	5	4,000 – less than 8,000 SR per month	3	more than 3	5 years	15	125	9.6	Underweight range	I don't no	Yes	No		0	1	1	1	1	1	0	1	6	0	0	0	0	0	1	1	1	3	1	1	0	1	1	1	0	0	5	4-5 /weekly	2-3 weekly	4-5 /weekly	2-3 weekly	more than once/day	4-5 /weekly
10:34:46 م 2022/08/17	23-27 years old	2	1	3	8,000 –less than 15,000 SR per month	1	1	5 years	27	I don't no	Missing data	Missing data	No	No	Yes	Family and friends	1	1	1	1	1	1	1	1	8	0	0	0	0	1	1	0	1	3	0	0	1	0	1	0	0	1	3	2-3 weekly	2-3 weekly	2-3 weekly	4-5 /weekly	4-5 /weekly	once weekly
12:17:55 ص 2022/08/18	23-27 years old	4	1	3	4,000 – less than 8,000 SR per month	1	more than 3	4 years	12	95	13.2964	Underweight range	No	No	No		1	0	0	0	0	0	0	0	1	0	0	0	0	0	1	0	1	2	0	1	1	0	1	1	1	1	6	once weekly	once /day	once or < monthly	once or < monthly	once /day	once or < monthly
12:59:41 ص 2022/08/18	23-27 years old	4	1	3	8,000 –less than 15,000 SR per month	3	2	4 years	14	102	13.4564	Underweight range	No	Yes	No		1	1	1	1	0	0	1	1	6	0	0	1	0	0	1	0	1	3	0	1	1	1	1	1	0	1	6	more than once/day	4-5 /weekly	more than once/day	more than once/day	more than once/day	4-5 /weekly
2:14:13 ص 2022/08/18	32-36 years old	4	1	3	4,000 – less than 8,000 SR per month	6	2	4 years	15	79	24.0346	Healthy weight range	Yes	No	No		0	0	0	0	0	0	0	0	0	1	0	0	0	1	1	1	1	5	1	1	1	1	1	1	1	1	8	once /day	Never	once /day	Never	once /day	Never
5:54:08 ص 2022/08/18	32-36 years old	4	1	3	4,000 – less than 8,000 SR per month	1	1	5 years	12	100	12	Underweight range	No	Yes	Yes	Social media \ Internet	1	0	0	1	0	0	0	1	3	0	0	1	0	0	0	0	1	2	0	0	1	1	1	1	0	1	5	4-5 /weekly	once weekly	4-5 /weekly	4-5 /weekly	once or < monthly	Never
1:51:37 ص 2022/08/20	28-31 years old	4	1	3	8,000 –less than 15,000 SR per month	1	1	3 years	16	76	27.7008	Overweight range	I don't no	Yes	Yes	Social media \ Internet	1	1	0	1	1	0	1	1	6	0	0	1	0	0	0	0	1	2	1	1	1	0	1	1	1	1	7	once weekly	2-3 weekly	2-3 weekly	once /day	once /day	once weekly
12:51:17 م 2022/08/23	32-36 years old	4	1	1	4,000 – less than 8,000 SR per month	3	2	4 years	15	90	18.5185	Healthy weight range	No	No	No		0	0	0	0	0	0	0	0	0	1	1	0	0	1	1	1	1	6	1	1	1	1	1	1	0	1	7	4-5 /weekly	once weekly	once /day	more than once/day	once /day	4-5 /weekly
8:55:50 ص 2022/08/24	32-36 years old	4	1	2	4,000 – less than 8,000 SR per month	1	1	3 years	14	I don't no	Missing data	Missing data	No	No	Yes	Social media \ Internet	1	1	1	1	1	1	1	1	8	1	0	1	1	1	1	1	1	7	1	1	1	1	1	1	1	0	7	once /day	once /day	once or < monthly	Never	2-3 weekly	Never
9:17:24 ص 2022/08/24	37-41 years old	4	1	2	Under 4,000 SR per month	1	1	4 years	19	I don't no	Missing data	Missing data	Yes	Yes	Yes	Social media \ Internet	1	1	0	0	0	0	1	1	4	1	0	1	1	0	1	0	1	5	1	1	1	1	1	1	1	0	7	once /day	once /day	2-3 weekly	2-3 weekly	once or < monthly	Never
9:40:57 ص 2022/08/24	37-41 years old	4	2	2	4,000 – less than 8,000 SR per month	1	1	3 years	14	100	14	Underweight range	Yes	No	Yes	Ministry of Health \ Food and Drug Administration	1	1	0	1	0	0	1	1	5	1	1	0	1	0	1	1	1	6	1	1	1	1	1	1	0	1	7	once /day	2-3 weekly	once /day	once weekly	once /day	Never
2:32:26 م 2022/08/24	37-41 years old	5	1	2	8,000 –less than 15,000 SR per month	1	1	3 years	11.9	92	14.0595	Underweight range	Yes	No	Yes	Social media \ Internet	1	1	1	1	1	1	1	1	8	0	0	1	0	0	0	1	1	3	1	1	1	1	1	1	0	1	7	once weekly	once /day	once weekly	Never	once /day	once weekly
10:22:39 م 2022/08/27	28-31 years old	4	1	3	4,000 – less than 8,000 SR per month	3	1	3 years	9	20	Missing data	Missing data	I don't no	I don't no	No		0	0	0	0	0	0	0	0	0	1	0	0	1	0	0	0	1	3	1	1	1	1	0	1	0	0	5	once /day	4-5 /weekly	once /day	once /day	once /day	2-3 weekly
4:53:56 ص 2022/08/31	32-36 years old	1	1	3	4,000 – less than 8,000 SR per month	1	2	5 years	16	97	17.005	Underweight range	No	Yes	Yes	Social media \ Internet	1	1	1	1	1	1	1	1	8	0	1	0	1	0	0	0	1	3	0	1	0	1	0	1	0	1	4	more than once/day	once /day	once /day	once /day	more than once/day	once /day
5:05:45 ص 2022/08/31	42-46 years old	4	1	3	15,000 – less than 25,000 SR per month	1	1	5 years	15	50	60	Obesity range	No	No	Yes	Ministry of Health \ Food and Drug Administration	1	1	1	1	0	0	1	1	6	0	0	1	1	0	0	0	1	3	1	1	1	0	1	1	0	1	6	4-5 /weekly	4-5 /weekly	2-3 weekly	2-3 weekly	4-5 /weekly	2-3 weekly
5:16:43 ص 2022/08/31	37-41 years old	4	1	3	8,000 –less than 15,000 SR per month	1	1	5 years	17	I don't no	Missing data	Missing data	No	Yes	Yes	TV/radio	1	0	1	1	0	0	1	1	5	0	0	1	1	0	1	0	0	3	0	0	0	1	0	1	0	1	3	2-3 weekly	4-5 /weekly	2-3 weekly	2-3 weekly	2-3 weekly	4-5 /weekly
5:24:01 ص 2022/08/31	42-46 years old	1	1	3	Under 4,000 SR per month	1	more than 3	5 years	14	I don't no	Missing data	Missing data	No	No	No		1	1	1	1	0	0	1	1	6	1	0	0	1	0	1	0	1	4	1	1	1	1	1	1	1	1	8	once weekly	once or < monthly	once or < monthly	2-3 weekly	2-3 weekly	Never
7:11:44 ص 2022/08/31	32-36 years old	4	1	3	15,000 – less than 25,000 SR per month	1	1	5 years	17	120	11.8056	Underweight range	No	Yes	Yes	Ministry of Health \ Food and Drug Administration	1	1	1	1	1	0	1	1	7	0	1	0	1	1	1	1	1	6	1	1	1	1	1	1	0	1	7	once /day	once /day	once /day	once /day	once /day	once /day
8:32:54 ص 2022/08/31	28-31 years old	4	1	3	4,000 – less than 8,000 SR per month	3	1	5 years	25	35	Missing data	Missing data	No	Yes	Yes	Social media \ Internet	1	1	0	0	1	1	1	1	6	1	1	1	0	1	1	1	1	7	1	1	1	1	1	1	1	0	7	once /day	once weekly	2-3 weekly	4-5 /weekly	4-5 /weekly	Never
10:45:23 ص 2022/08/31	23-27 years old	4	1	2	4,000 – less than 8,000 SR per month	1	1	4 years	16	114	12.3115	Underweight range	No	No	No		0	1	1	1	0	1	1	1	6	0	0	1	0	0	0	1	1	3	1	1	1	1	1	1	0	1	7	once /day	2-3 weekly	once or < monthly	2-3 weekly	once /day	Never
12:28:58 م 2022/08/31	37-41 years old	4	1	3	8,000 –less than 15,000 SR per month	1	1	5 years	15	100	15	Underweight range	No	Yes	No		0	0	0	0	0	0	0	0	0	0	0	0	0	0	0	0	1	1	1	1	1	1	1	1	1	0	7	once /day	4-5 /weekly	once /day	once /day	4-5 /weekly	4-5 /weekly
12:31:08 م 2022/08/31	32-36 years old	3	1	4	4,000 – less than 8,000 SR per month	1	2	5 years	17	90	20.9877	Healthy weight range	No	No	No		0	0	0	0	0	0	1	1	2	0	0	1	1	0	0	0	1	3	0	1	1	0	0	0	0	1	3	once /day	once /day	once /day	once /day	once /day	once /day
12:49:16 م 2022/08/31	37-41 years old	4	1	3	15,000 – less than 25,000 SR per month	1	1	5 years	20	70	40.8163	Obesity range	I don't no	No	No		0	0	0	1	0	0	1	1	3	0	0	1	0	0	0	0	1	2	0	0	1	0	1	0	0	1	3	more than once/day	more than once/day	more than once/day	2-3 weekly	4-5 /weekly	more than once/day
5:30:16 م 2022/08/31	32-36 years old	4	1	2	15,000 – less than 25,000 SR per month	2	1	4 years	13	I don't no	Missing data	Missing data	No	Yes	Yes	Social media \ Internet	1	1	1	1	1	1	1	1	8	0	0	1	1	1	0	1	1	5	1	1	1	1	1	1	1	1	8	4-5 /weekly	4-5 /weekly	4-5 /weekly	4-5 /weekly	2-3 weekly	once or < monthly
4:41:49 ص 2022/09/02	Above 46 years old	2	1	3	8,000 –less than 15,000 SR per month	1	more than 3	5 years	26	125	16.64	Underweight range	Yes	Yes	Yes	Ministry of Health \ Food and Drug Administration	1	1	1	1	1	1	1	1	8	0	1	1	0	0	1	1	1	5	1	1	1	1	1	1	0	1	7	more than once/day	more than once/day	more than once/day	more than once/day	more than once/day	once /day
12:45:05 م 2022/09/13	18-22 years old	4	1	4	8,000 –less than 15,000 SR per month	2	2	4 years	24	95	26.5928	Overweight range	No	No	Yes	Ministry of Health \ Food and Drug Administration	1	0	1	1	0	1	1	1	6	1	1	0	0	1	1	1	1	6	1	1	1	1	1	1	0	1	7	2-3 weekly	2-3 weekly	once /day	once /day	4-5 /weekly	Never
12:46:29 م 2022/09/13	28-31 years old	2	1	3	8,000 –less than 15,000 SR per month	1	3	5 years	20	10	Missing data	Missing data	No	No	No		0	0	0	0	1	1	1	1	4	1	1	1	1	1	1	1	1	8	1	1	1	1	1	1	1	1	8	once /day	once /day	once /day	once /day	more than once/day	Never
1:59:10 م 2022/09/13	23-27 years old	2	1	3	Under 4,000 SR per month	7	3	4 years	14	I don't no	Missing data	Missing data	No	No	Yes	Social media \ Internet	1	1	0	1	0	0	1	1	5	1	1	0	1	0	0	0	1	4	1	1	1	1	1	1	1	1	8	once /day	2-3 weekly	2-3 weekly	once /day	once /day	2-3 weekly
1:59:14 م 2022/09/13	23-27 years old	2	1	3	Under 4,000 SR per month	7	3	4 years	14	I don't no	Missing data	Missing data	No	No	Yes	Social media \ Internet	1	1	0	1	0	0	1	1	5	1	1	0	1	0	0	0	1	4	1	1	1	1	1	1	1	1	8	once /day	2-3 weekly	2-3 weekly	once /day	once /day	2-3 weekly
4:24:38 م 2022/09/26	32-36 years old	3	1	3	4,000 – less than 8,000 SR per month	6	1	5 years	18	90	22.2222	Healthy weight range	Yes	No	Yes	Social media \ Internet	1	0	1	1	1	0	1	0	5	0	0	0	1	0	0	0	1	2	1	1	1	0	1	0	0	1	5	2-3 weekly	once /day	once or < monthly	once or < monthly	once or < monthly	once /day
5:32:58 م 2022/09/26	32-36 years old	2	1	3	4,000 – less than 8,000 SR per month	3	1	3 years	19	50	76	Obesity range	No	No	Yes	Social media \ Internet	1	1	1	1	0	1	1	1	7	0	0	1	1	1	0	0	1	4	1	1	1	0	0	1	0	1	5	2-3 weekly	2-3 weekly	once or < monthly	4-5 /weekly	once /day	4-5 /weekly
2:58:13 م 2022/09/27	28-31 years old	4	1	3	8,000 –less than 15,000 SR per month	1	1	4 years	16	100	16	Underweight range	No	No	Yes	Social media \ Internet	1	1	0	0	1	1	1	1	6	1	0	0	0	0	0	1	1	3	1	1	1	0	1	1	1	1	7	2-3 weekly	2-3 weekly	once weekly	4-5 /weekly	2-3 weekly	once or < monthly
2:59:17 م 2022/09/27	37-41 years old	4	1	2	8,000 –less than 15,000 SR per month	1	1	4 years	21	129	12.6194	Underweight range	No	Yes	No		0	0	0	0	0	0	0	0	0	1	0	0	0	0	1	1	1	4	1	1	1	1	1	1	0	0	6	2-3 weekly	2-3 weekly	2-3 weekly	once /day	4-5 /weekly	2-3 weekly
3:01:41 م 2022/09/27	23-27 years old	1	2	3	Under 4,000 SR per month	1	1	5 years	27	50	108	Obesity range	I don't no	Yes	No		0	0	0	0	0	0	1	1	2	0	1	0	0	1	1	0	1	4	1	0	0	1	0	1	0	1	4	2-3 weekly	2-3 weekly	2-3 weekly	2-3 weekly	4-5 /weekly	2-3 weekly
3:07:59 م 2022/09/27	28-31 years old	4	1	2	4,000 – less than 8,000 SR per month	1	2	5 years	17	100	17	Underweight range	No	No	Yes	Social media \ Internet	1	1	1	0	1	0	0	1	5	0	0	1	1	1	0	0	1	4	1	1	1	1	1	1	0	0	6	2-3 weekly	once weekly	4-5 /weekly	2-3 weekly	once weekly	once weekly
3:08:16 م 2022/09/27	28-31 years old	4	1	3	8,000 –less than 15,000 SR per month	1	1	5 years	16	100	16	Underweight range	No	No	Yes	Social media \ Internet	1	1	1	1	0	0	1	1	6	0	0	0	0	0	0	0	1	1	0	1	1	1	0	0	0	1	4	2-3 weekly	once /day	once /day	2-3 weekly	once /day	once /day
3:16:25 م 2022/09/27	23-27 years old	2	1	3	4,000 – less than 8,000 SR per month	1	1	5 years	16	120	11.1111	Underweight range	No	No	Yes	Ministry of Health \ Food and Drug Administration	1	1	1	1	1	1	1	1	8	0	0	1	0	0	1	0	1	3	1	1	1	1	1	1	1	0	7	2-3 weekly	once weekly	once weekly	2-3 weekly	2-3 weekly	Never
3:16:54 م 2022/09/27	28-31 years old	4	1	3	4,000 – less than 8,000 SR per month	1	2	3 years	18	I don't no	Missing data	Missing data	Yes	Yes	No		0	0	0	0	0	0	0	0	0	0	0	0	0	0	0	0	0	0	1	0	1	1	1	1	1	1	7	once /day	once /day	once /day	4-5 /weekly	2-3 weekly	more than once/day
4:29:21 م 2022/09/27	28-31 years old	4	1	3	8,000 –less than 15,000 SR per month	1	2	5 years	14	I don't no	Missing data	Missing data	No	Yes	Yes	Social media \ Internet	1	1	1	1	1	0	1	1	7	0	0	1	0	0	0	0	1	2	1	1	1	1	0	1	1	1	7	more than once/day	once /day	once /day	2-3 weekly	once /day	2-3 weekly
4:51:14 م 2022/09/27	28-31 years old	3	1	1	Under 4,000 SR per month	1	2	5 years	16	110	13.2231	Underweight range	No	No	No		0	0	0	1	1	1	1	1	5	1	0	1	1	0	0	0	1	4	1	1	1	1	1	1	1	0	7	more than once/day	more than once/day	once weekly	once weekly	once weekly	once or < monthly
5:14:00 م 2022/09/27	42-46 years old	3	1	2	8,000 –less than 15,000 SR per month	3	more than 3	5 years	35	34	Missing data	Missing data	No	Yes	Yes	Social media \ Internet	1	1	1	1	1	1	1	1	8	1	1	1	1	1	1	0	1	7	1	1	1	1	1	1	1	1	8	more than once/day	more than once/day	more than once/day	more than once/day	more than once/day	once /day
6:03:58 م 2022/09/27	28-31 years old	4	1	2	8,000 –less than 15,000 SR per month	1	1	4 years	14	100	14	Underweight range	No	No	Yes	Social media \ Internet	1	1	0	0	1	1	0	1	5	1	1	1	0	1	1	1	1	7	1	1	1	1	1	1	1	0	7	2-3 weekly	once weekly	2-3 weekly	2-3 weekly	once /day	Never
6:07:09 م 2022/09/27	42-46 years old	4	1	2	8,000 –less than 15,000 SR per month	1	1	5 years	20	95	22.1607	Healthy weight range	No	Yes	No		1	1	0	0	0	0	0	0	2	0	0	0	0	0	0	0	1	1	0	1	1	1	1	1	1	1	7	more than once/day	more than once/day	2-3 weekly	once /day	once /day	once or < monthly
6:28:52 م 2022/09/27	32-36 years old	2	1	3	8,000 –less than 15,000 SR per month	1	1	5 years	13	I don't no	Missing data	Missing data	No	No	Yes	Ministry of Health \ Food and Drug Administration	1	1	1	0	0	0	1	1	5	0	0	1	1	0	0	1	1	4	0	1	1	1	1	1	1	1	7	once /day	once /day	more than once/day	more than once/day	more than once/day	more than once/day
7:45:54 م 2022/09/27	23-27 years old	4	1	3	8,000 –less than 15,000 SR per month	1	1	5 years	16	120	11.1111	Underweight range	Yes	Yes	Yes	Universities \ schools	1	1	1	1	1	1	0	1	7	0	1	0	0	0	0	1	1	3	1	1	1	0	1	1	0	1	6	once /day	4-5 /weekly	once /day	2-3 weekly	4-5 /weekly	once or < monthly
7:58:01 م 2022/09/27	28-31 years old	4	1	1	4,000 – less than 8,000 SR per month	1	1	4 years	14	13	Missing data	Missing data	No	Yes	No		1	1	1	1	1	0	0	0	5	1	1	1	1	0	0	1	1	6	1	1	1	1	1	1	1	0	7	once weekly	once weekly	once weekly	more than once/day	more than once/day	once weekly
4:48:55 م 2022/10/10	28-31 years old	4	1	3	4,000 – less than 8,000 SR per month	1	1	3 years	12.5	90	15.4321	Underweight range	No	No	Yes	Universities \ schools	1	1	1	1	1	1	1	1	8	0	1	1	1	1	0	1	1	6	1	1	1	1	1	1	0	1	7	once /day	2-3 weekly	4-5 /weekly	once /day	4-5 /weekly	Never
5:44:21 م 2022/10/10	23-27 years old	4	1	3	4,000 – less than 8,000 SR per month	6	2	3 years	12	I don't no	Missing data	Missing data	No	No	No		0	0	0	0	0	0	0	0	0	1	0	1	0	1	1	0	1	5	0	0	1	1	0	1	1	0	4	2-3 weekly	2-3 weekly	2-3 weekly	once /day	once /day	once weekly
6:50:03 م 2022/10/10	23-27 years old	4	1	3	8,000 –less than 15,000 SR per month	1	1	3 years	11.3	I don't no	Missing data	Missing data	Yes	No	Yes	Universities \ schools	1	1	1	0	1	1	1	1	7	1	0	1	0	0	1	0	1	4	1	1	1	1	1	1	1	1	8	2-3 weekly	once or < monthly	Never	once or < monthly	Never	Never
7:02:54 م 2022/10/10	28-31 years old	4	1	2	15,000 – less than 25,000 SR per month	1	1	5 years	18	90	22.2222	Healthy weight range	Yes	No	Yes	Family and friends	1	1	1	1	1	1	1	1	8	0	1	1	1	1	1	1	1	7	1	1	1	1	1	1	0	1	7	once /day	once /day	once /day	once /day	once /day	once /day
9:15:27 م 2022/10/10	28-31 years old	4	1	2	4,000 – less than 8,000 SR per month	1	1	4 years	13	I don't no	Missing data	Missing data	No	No	Yes	Universities \ schools	1	1	1	1	1	1	1	1	8	1	0	1	1	0	0	0	1	4	1	1	1	1	1	1	1	1	8	2-3 weekly	once weekly	once weekly	once /day	4-5 /weekly	once weekly
9:34:00 م 2022/10/10	23-27 years old	2	1	3	8,000 –less than 15,000 SR per month	2	2	5 years	18	75	32	Obesity range	Yes	No	No		1	1	0	0	0	0	1	1	4	0	0	1	0	0	0	1	1	3	0	0	0	0	1	1	0	1	3	once /day	2-3 weekly	4-5 /weekly	once /day	once /day	4-5 /weekly
10:08:15 م 2022/10/10	23-27 years old	2	1	3	15,000 – less than 25,000 SR per month	1	1	3 years	12.5	94	14.1467	Underweight range	No	Yes	Yes	Social media \ Internet	1	1	0	0	0	0	1	1	4	0	1	1	0	1	1	1	1	6	1	1	1	1	0	1	0	1	6	2-3 weekly	once weekly	once weekly	once or < monthly	2-3 weekly	once or < monthly
1:40:39 م 2022/10/11	32-36 years old	2	2	3	Under 4,000 SR per month	4	3	5 years	15	115	11.3422	Underweight range	No	No	No		0	0	0	0	0	0	0	0	0	1	0	0	0	0	0	0	1	2	0	0	1	0	0	0	0	0	1	4-5 /weekly	4-5 /weekly	once weekly	Never	Never	once /day
4:34:50 م 2022/10/11	28-31 years old	1	1	3	4,000 – less than 8,000 SR per month	3	3	5 years	18	105	16.3265	Underweight range	No	No	No		0	0	0	1	0	0	0	1	2	1	0	1	0	0	1	1	1	5	1	1	1	1	1	1	0	1	7	more than once/day	more than once/day	more than once/day	once weekly	more than once/day	once weekly
4:37:31 م 2022/10/11	32-36 years old	4	1	3	4,000 – less than 8,000 SR per month	3	1	4 years	17	50	68	Obesity range	Yes	No	No		1	1	1	1	1	1	1	1	8	0	0	1	1	1	1	1	1	6	1	1	1	1	1	1	1	1	8	once weekly	2-3 weekly	once or < monthly	once weekly	once or < monthly	Never
1:56:40 ص 2022/10/12	28-31 years old	4	1	3	4,000 – less than 8,000 SR per month	3	1	3 years	12.9	92	15.241	Underweight range	I don't no	No	Yes	Social media \ Internet	1	1	1	1	0	0	0	0	4	0	0	1	1	0	0	0	1	3	1	0	1	1	1	1	1	1	7	2-3 weekly	once weekly	2-3 weekly	once /day	once or < monthly	once or < monthly
7:13:33 ص 2022/10/12	32-36 years old	4	1	3	4,000 – less than 8,000 SR per month	3	1	5 years	14	120	9.72222	Underweight range	No	No	No		0	0	1	1	0	1	1	1	5	0	1	0	0	1	1	1	1	5	1	1	1	1	1	1	0	1	7	Never	once /day	Never	once or < monthly	more than once/day	once or < monthly
2:10:53 م 2022/10/12	32-36 years old	1	1	3	4,000 – less than 8,000 SR per month	2	more than 3	4 years	18	120	12.5	Underweight range	No	No	Yes	Social media \ Internet	1	1	1	1	1	1	0	1	7	0	0	1	0	1	1	0	1	4	0	1	1	1	1	1	1	1	7	2-3 weekly	2-3 weekly	once weekly	once or < monthly	once or < monthly	Never
4:57:32 م 2022/10/18	28-31 years old	4	1	2	4,000 – less than 8,000 SR per month	4	2	3 years	13.8	97	14.6668	Underweight range	No	No	Yes	Ministry of Health \ Food and Drug Administration	1	1	1	1	0	0	1	1	6	1	1	1	0	1	1	1	1	7	1	1	1	1	1	1	0	1	7	2-3 weekly	once weekly	2-3 weekly	once weekly	once or < monthly	Never
4:51:12 م 2022/10/19	37-41 years old	4	1	3	15,000 – less than 25,000 SR per month	2	1	5 years	18	100	18	Underweight range	No	No	Yes	Ministry of Health \ Food and Drug Administration	1	1	0	1	1	1	1	1	7	1	0	1	0	0	0	1	0	3	1	1	1	1	1	1	1	1	8	once weekly	once or < monthly	once weekly	once weekly	2-3 weekly	Never
5:17:41 م 2022/10/19	32-36 years old	4	1	3	8,000 –less than 15,000 SR per month	4	1	5 years	20	95	22.1607	Healthy weight range	No	No	No		0	0	0	0	0	0	0	1	1	0	0	1	0	0	0	1	1	3	0	1	1	1	1	1	0	1	6	more than once/day	more than once/day	more than once/day	more than once/day	more than once/day	more than once/day
5:25:18 م 2022/10/19	23-27 years old	3	1	3	4,000 – less than 8,000 SR per month	1	1	5 years	20	90	24.6914	Healthy weight range	No	No	No		1	1	1	1	1	1	1	1	8	1	0	1	0	1	1	1	1	6	0	1	1	1	1	1	1	1	7	once /day	once /day	4-5 /weekly	more than once/day	once /day	2-3 weekly
5:34:00 م 2022/10/19	23-27 years old	5	1	2	Above 25,000 SR per month	1	1	3 years	29	134	16.1506	Underweight range	No	No	Yes	Ministry of Health \ Food and Drug Administration	1	1	1	1	1	1	1	1	8	1	1	1	0	1	1	1	1	7	1	1	1	1	1	1	0	1	7	once weekly	once or < monthly	once or < monthly	once /day	4-5 /weekly	Never
6:02:00 م 2022/10/19	28-31 years old	4	1	3	8,000 –less than 15,000 SR per month	1	1	4 years	11	110	9.09091	Underweight range	I don't no	No	Yes	Social media \ Internet	1	1	0	0	0	0	1	1	4	0	0	1	0	0	0	1	1	3	0	1	1	1	1	1	1	1	7	once /day	once /day	once /day	4-5 /weekly	once /day	once weekly
6:02:46 م 2022/10/19	28-31 years old	5	1	4	8,000 –less than 15,000 SR per month	4	1	5 years	18	101	17.6453	Underweight range	Yes	No	Yes	Universities \ schools	1	1	1	0	0	0	1	1	5	0	0	1	0	0	0	0	1	2	0	0	1	1	0	1	0	1	4	once weekly	once weekly	4-5 /weekly	once weekly	once weekly	2-3 weekly
6:38:49 م 2022/10/19	37-41 years old	4	1	3	8,000 –less than 15,000 SR per month	6	1	4 years	13	10	Missing data	Missing data	No	No	No		0	1	0	1	0	1	1	1	5	1	1	1	0	0	0	1	1	5	1	1	1	1	1	1	0	1	7	once /day	once /day	once weekly	once weekly	once /day	once weekly
7:33:51 م 2022/10/19	37-41 years old	4	1	2	4,000 – less than 8,000 SR per month	2	1	3 years	14	90	17.284	Underweight range	No	No	Yes	Social media \ Internet	0	0	1	0	1	1	1	0	4	0	0	0	1	1	1	1	1	5	1	1	1	1	1	1	0	1	7	once weekly	once weekly	2-3 weekly	4-5 /weekly	4-5 /weekly	once weekly
7:51:43 م 2022/10/19	23-27 years old	5	1	2	Above 25,000 SR per month	3	2	5 years	16	120	11.1111	Underweight range	No	No	Yes	Ministry of Health \ Food and Drug Administration	1	1	1	1	1	1	1	1	8	0	1	1	1	0	0	0	1	4	1	1	1	0	1	1	0	0	5	once /day	2-3 weekly	once /day	once /day	2-3 weekly	2-3 weekly
7:51:45 م 2022/10/19	18-22 years old	4	1	4	15,000 – less than 25,000 SR per month	1	1	3 years	11	90	13.5802	Underweight range	No	No	Yes	Social media \ Internet	1	1	1	1	1	1	1	1	8	1	1	1	0	1	1	1	1	7	1	1	1	0	1	1	0	0	5	4-5 /weekly	once weekly	2-3 weekly	once weekly	4-5 /weekly	Never
7:52:41 م 2022/10/19	18-22 years old	2	1	4	4,000 – less than 8,000 SR per month	7	1	3 years	12	40	75	Obesity range	No	No	No		0	0	0	0	0	0	0	0	0	1	0	0	1	0	1	1	1	5	1	1	1	1	1	1	0	0	6	2-3 weekly	once /day	once weekly	Never	once /day	Never
7:56:27 م 2022/10/19	23-27 years old	4	1	2	4,000 – less than 8,000 SR per month	1	1	3 years	15	112	11.9579	Underweight range	I don't no	I don't no	Yes	Universities \ schools	1	1	1	1	1	1	1	1	8	0	0	0	1	1	1	1	1	5	1	1	1	1	1	1	0	1	7	once /day	once /day	more than once/day	once /day	once /day	once /day
8:12:02 م 2022/10/19	32-36 years old	2	1	3	4,000 – less than 8,000 SR per month	4	more than 3	5 years	21	130	12.426	Underweight range	No	Yes	No		0	0	0	1	0	0	1	0	2	1	0	1	0	1	0	1	1	5	0	1	1	0	0	1	0	0	3	2-3 weekly	2-3 weekly	2-3 weekly	once weekly	2-3 weekly	2-3 weekly
8:27:19 م 2022/10/19	28-31 years old	5	1	1	Above 25,000 SR per month	1	2	4 years	10	90	12.3457	Underweight range	No	No	Yes	Family and friends	0	1	1	1	0	0	1	1	5	0	1	1	1	1	1	0	1	6	1	0	0	0	1	1	0	1	4	once /day	once /day	once /day	once /day	once /day	once /day
9:40:06 م 2022/10/19	32-36 years old	4	1	3	4,000 – less than 8,000 SR per month	3	1	3 years	8	10	Missing data	Missing data	No	Yes	Yes	Ministry of Health \ Food and Drug Administration	1	1	1	1	1	0	0	1	6	0	1	1	1	1	0	1	1	6	1	1	1	1	1	1	0	1	7	more than once/day	more than once/day	more than once/day	more than once/day	more than once/day	more than once/day
10:12:42 م 2022/10/19	37-41 years old	5	1	2	8,000 –less than 15,000 SR per month	4	1	4 years	24	100	24	Healthy weight range	No	No	Yes	Social media \ Internet	1	1	1	0	0	0	0	1	4	0	0	1	0	0	0	1	1	3	1	1	1	1	1	1	0	1	7	2-3 weekly	2-3 weekly	2-3 weekly	once weekly	2-3 weekly	4-5 /weekly
10:19:12 م 2022/10/19	32-36 years old	5	1	1	4,000 – less than 8,000 SR per month	4	1	3 years	16	106	14.2399	Underweight range	No	Yes	No		1	0	0	0	1	1	1	1	5	1	0	1	0	1	1	1	1	6	1	1	1	1	1	1	0	1	7	4-5 /weekly	4-5 /weekly	once /day	once /day	once /day	once or < monthly
10:20:41 م 2022/10/19	32-36 years old	5	1	4	8,000 –less than 15,000 SR per month	1	2	5 years	18	113	14.0966	Underweight range	No	No	No		0	1	1	1	1	1	1	0	6	0	0	1	0	0	0	1	1	3	0	1	1	1	1	1	1	1	7	2-3 weekly	once weekly	once /day	Never	once /day	Never
10:42:22 م 2022/10/19	32-36 years old	5	1	3	15,000 – less than 25,000 SR per month	3	2	3 years	11	60	30.5556	Obesity range	No	No	Yes	Newspapers and magazines	1	1	0	0	0	1	0	1	4	1	0	0	0	0	0	1	1	3	0	1	1	1	1	1	0	1	6	more than once/day	more than once/day	once /day	once /day	more than once/day	once /day
10:46:34 م 2022/10/19	32-36 years old	4	1	2	Above 25,000 SR per month	1	1	3 years	16	0	Missing data	Missing data	No	No	No		0	0	0	0	0	0	0	0	0	1	1	1	0	1	0	1	1	6	1	1	1	1	1	1	1	0	7	once /day	Never	once /day	once /day	once /day	Never
11:16:01 م 2022/10/19	37-41 years old	1	1	3	4,000 – less than 8,000 SR per month	3	2	5 years	24	95	26.5928	Overweight range	No	Yes	Yes	Ministry of Health \ Food and Drug Administration	1	1	1	1	0	0	1	1	6	0	0	0	1	1	1	1	1	5	1	1	1	0	1	1	0	1	6	once /day	once /day	once /day	once /day	once /day	once weekly
1:51:35 ص 2022/10/20	32-36 years old	3	1	3	4,000 – less than 8,000 SR per month	3	1	5 years	12	110	9.91736	Underweight range	No	No	Yes	Social media \ Internet	1	1	1	1	0	0	1	1	6	0	1	1	0	0	0	0	1	3	1	1	1	1	1	1	0	1	7	once weekly	2-3 weekly	once /day	once /day	once /day	2-3 weekly
3:40:56 م 2022/10/20	23-27 years old	4	1	4	Under 4,000 SR per month	8	1	3 years	14	24	Missing data	Missing data	No	No	No		0	0	1	1	1	0	1	0	4	0	0	1	0	0	0	0	1	2	0	0	0	0	1	1	0	1	3	more than once/day	once /day	once or < monthly	once /day	once /day	2-3 weekly
5:36:13 م 2022/10/20	42-46 years old	3	1	3	4,000 – less than 8,000 SR per month	3	2	5 years	25	50	100	Obesity range	No	Yes	Yes	Ministry of Health \ Food and Drug Administration	1	1	1	1	1	1	1	1	8	1	0	0	0	0	0	0	0	1	1	1	1	1	1	1	0	1	7	once weekly	2-3 weekly	once weekly	2-3 weekly	once weekly	2-3 weekly
8:36:18 م 2022/10/20	28-31 years old	4	1	3	8,000 –less than 15,000 SR per month	1	1	5 years	14	90	17.284	Underweight range	No	Yes	Yes	Family and friends	1	1	0	0	0	0	0	1	3	1	1	1	0	1	0	1	1	6	1	1	1	1	0	1	0	0	5	2-3 weekly	2-3 weekly	4-5 /weekly	4-5 /weekly	2-3 weekly	once or < monthly
4:54:09 م 2022/10/23	28-31 years old	4	1	2	8,000 –less than 15,000 SR per month	1	1	3 years	20	100	20	Healthy weight range	No	No	Yes	Universities \ schools	1	1	1	1	1	1	1	1	8	0	1	1	0	0	0	0	1	3	1	1	1	1	1	1	1	1	8	once /day	once /day	once weekly	Never	Never	once or < monthly
5:00:28 م 2022/10/23	28-31 years old	4	1	3	8,000 –less than 15,000 SR per month	1	1	4 years	16	100	16	Underweight range	No	No	No		0	0	1	1	0	0	0	1	3	0	0	0	1	0	0	0	1	2	1	1	1	1	1	0	0	1	6	once /day	2-3 weekly	2-3 weekly	2-3 weekly	once weekly	Never
6:03:58 م 2022/10/23	28-31 years old	4	1	3	4,000 – less than 8,000 SR per month	1	1	3 years	22	9	Missing data	Missing data	No	No	Yes	Social media \ Internet	1	1	0	0	0	0	1	1	4	0	0	1	0	1	1	0	1	4	1	1	1	1	1	1	0	1	7	once /day	Never	once /day	4-5 /weekly	4-5 /weekly	once /day
10:44:18 م 2022/10/23	28-31 years old	5	1	2	8,000 –less than 15,000 SR per month	1	1	3 years	12.5	92	14.7684	Underweight range	No	No	Yes	Ministry of Health \ Food and Drug Administration	1	1	1	1	1	1	1	1	8	1	1	0	1	0	0	1	1	5	1	1	1	1	1	1	1	1	8	once weekly	once weekly	2-3 weekly	2-3 weekly	2-3 weekly	Never
10:48:28 م 2022/10/23	32-36 years old	5	1	3	4,000 – less than 8,000 SR per month	1	1	5 years	14	100	14	Underweight range	No	No	Yes	Social media \ Internet	0	1	1	0	0	0	1	0	3	1	1	0	0	1	0	1	1	5	1	1	1	1	1	1	1	1	8	once weekly	Never	2-3 weekly	Never	once /day	2-3 weekly
5:17:14 م 2022/10/25	32-36 years old	4	1	2	15,000 – less than 25,000 SR per month	1	more than 3	5 years	27	100	27	Overweight range	No	No	Yes	Social media \ Internet	0	1	1	1	1	1	1	1	7	0	0	1	0	1	1	1	1	5	1	1	1	1	0	1	1	1	7	once /day	once weekly	once weekly	2-3 weekly	once /day	once weekly
6:14:07 م 2022/10/25	32-36 years old	4	1	3	8,000 –less than 15,000 SR per month	1	2	5 years	18	I don't no	Missing data	Missing data	No	Yes	Yes	Ministry of Health \ Food and Drug Administration	1	1	1	1	1	1	1	0	7	0	1	0	0	1	1	1	1	5	1	1	1	1	1	1	1	0	7	once /day	once weekly	once or < monthly	2-3 weekly	once /day	Never
6:17:31 م 2022/10/25	37-41 years old	4	1	3	15,000 – less than 25,000 SR per month	3	1	4 years	11	80	17.1875	Underweight range	No	Yes	Yes	Social media \ Internet	1	1	0	1	1	1	0	1	6	1	1	1	0	1	1	1	1	7	1	1	1	1	1	1	1	1	8	once /day	once /day	2-3 weekly	2-3 weekly	once or < monthly	once weekly
6:37:54 م 2022/10/25	32-36 years old	5	2	2	8,000 –less than 15,000 SR per month	4	1	3 years	13	113	10.1809	Underweight range	No	No	Yes	Universities \ schools	1	1	1	1	1	1	1	1	8	0	1	1	1	1	1	0	1	6	1	1	1	1	1	1	1	1	8	2-3 weekly	2-3 weekly	2-3 weekly	2-3 weekly	4-5 /weekly	Never
6:38:29 م 2022/10/25	32-36 years old	4	1	3	15,000 – less than 25,000 SR per month	3	1	5 years	16	110	13.2231	Underweight range	No	No	Yes	Universities \ schools	1	1	1	1	1	1	1	1	8	1	0	1	1	0	0	1	1	5	1	1	1	1	1	1	0	1	7	once /day	once /day	once weekly	4-5 /weekly	4-5 /weekly	Never
7:07:40 م 2022/10/25	32-36 years old	1	3	3	Under 4,000 SR per month	4	1	3 years	14	89	17.6745	Underweight range	No	Yes	No		0	1	1	1	0	0	1	1	5	0	0	1	0	0	0	0	1	2	1	1	1	0	0	1	0	0	4	once /day	2-3 weekly	2-3 weekly	once or < monthly	once /day	once /day
7:45:34 م 2022/10/25	37-41 years old	5	1	2	4,000 – less than 8,000 SR per month	1	1	3 years	12	90	14.8148	Underweight range	No	No	Yes	Social media \ Internet	1	1	0	0	0	0	1	0	3	0	0	1	0	0	0	1	1	3	1	1	1	1	1	1	1	1	8	once /day	2-3 weekly	2-3 weekly	2-3 weekly	Never	Never
8:18:02 م 2022/10/25	Above 46 years old	5	1	5	4,000 – less than 8,000 SR per month	1	2	5 years	26	120	18.0556	Underweight range	No	Yes	Yes	Ministry of Health \ Food and Drug Administration	1	1	1	1	1	1	1	1	8	0	1	1	1	1	1	1	1	7	1	1	1	1	1	1	0	1	7	once /day	once /day	once /day	once /day	once /day	once /day
8:37:23 م 2022/10/25	23-27 years old	4	1	2	4,000 – less than 8,000 SR per month	1	1	5 years	16	110	13.2231	Underweight range	No	No	Yes	Newspapers and magazines	1	1	1	1	1	1	1	1	8	0	1	1	0	1	1	1	1	6	1	1	1	1	1	1	0	1	7	once /day	2-3 weekly	more than once/day	once or < monthly	once weekly	2-3 weekly
8:52:36 م 2022/10/25	37-41 years old	4	1	2	8,000 –less than 15,000 SR per month	3	1	5 years	22	90	27.1605	Overweight range	No	Yes	Yes	Social media \ Internet	1	1	0	1	1	1	1	1	7	0	0	1	0	1	1	1	1	5	1	1	1	1	1	1	0	0	6	more than once/day	more than once/day	more than once/day	more than once/day	more than once/day	more than once/day
8:59:23 م 2022/10/25	32-36 years old	4	2	3	8,000 –less than 15,000 SR per month	3	1	5 years	20	80	31.25	Obesity range	No	No	No		0	0	0	0	0	0	0	1	1	1	0	1	1	0	0	1	1	5	1	0	0	0	0	0	0	0	1	once weekly	4-5 /weekly	4-5 /weekly	2-3 weekly	4-5 /weekly	once weekly
9:02:32 م 2022/10/25	32-36 years old	4	1	3	8,000 –less than 15,000 SR per month	3	1	5 years	18	125	11.52	Underweight range	No	No	Yes	Social media \ Internet	1	1	0	0	0	0	1	1	4	0	0	1	0	0	0	0	1	2	0	1	1	0	1	1	0	0	4	once /day	once weekly	once weekly	4-5 /weekly	once or < monthly	once or < monthly
9:05:25 م 2022/10/25	37-41 years old	4	1	3	Above 25,000 SR per month	3	2	4 years	20	110	16.5289	Underweight range	No	No	Yes	Social media \ Internet	1	1	1	1	0	1	1	1	7	0	0	0	1	1	1	0	1	4	1	1	1	1	1	1	1	1	8	4-5 /weekly	4-5 /weekly	4-5 /weekly	4-5 /weekly	Never	Never
9:06:14 م 2022/10/25	28-31 years old	4	1	3	4,000 – less than 8,000 SR per month	3	1	5 years	23	55	76.0331	Obesity range	No	Yes	No		1	1	1	1	1	0	1	1	7	0	0	1	0	1	1	1	1	5	1	1	1	0	1	1	0	0	5	4-5 /weekly	once /day	2-3 weekly	once weekly	once weekly	once weekly
9:07:18 م 2022/10/25	32-36 years old	4	1	3	8,000 –less than 15,000 SR per month	3	2	5 years	15	90	18.5185	Healthy weight range	No	Yes	No		0	1	1	1	0	0	1	1	5	0	0	1	1	0	0	1	1	4	1	1	1	1	1	1	0	1	7	once /day	once /day	once /day	once /day	once /day	2-3 weekly
9:09:16 م 2022/10/25	28-31 years old	5	2	2	15,000 – less than 25,000 SR per month	1	1	5 years	20	110	16.5289	Underweight range	No	No	Yes	Ministry of Health \ Food and Drug Administration	1	1	1	1	1	1	1	1	8	0	1	1	1	0	0	0	1	4	1	1	1	1	1	1	1	0	7	2-3 weekly	once or < monthly	once or < monthly	once weekly	once /day	Never
9:11:45 م 2022/10/25	32-36 years old	2	1	3	4,000 – less than 8,000 SR per month	3	1	5 years	20	110	16.5289	Underweight range	No	No	No		1	1	1	1	1	1	1	1	8	0	0	1	0	0	0	0	1	2	1	1	1	1	1	1	1	1	8	2-3 weekly	2-3 weekly	once or < monthly	2-3 weekly	2-3 weekly	once or < monthly
9:12:54 م 2022/10/25	37-41 years old	4	1	3	4,000 – less than 8,000 SR per month	3	1	3 years	12	66	27.5482	Overweight range	No	No	Yes	Social media \ Internet	1	1	0	1	1	1	1	1	7	0	0	1	0	0	0	1	1	3	1	1	1	1	1	1	0	1	7	2-3 weekly	2-3 weekly	2-3 weekly	2-3 weekly	4-5 /weekly	2-3 weekly
9:26:51 م 2022/10/25	37-41 years old	5	1	2	Above 25,000 SR per month	1	1	5 years	20	116	14.8633	Underweight range	No	No	Yes	Universities \ schools	1	1	1	1	1	1	1	0	7	0	1	1	1	0	0	0	1	4	0	0	0	0	1	1	0	1	3	once /day	once /day	4-5 /weekly	2-3 weekly	once or < monthly	Never
9:28:48 م 2022/10/25	23-27 years old	5	1	4	8,000 –less than 15,000 SR per month	1	1	4 years	13	91	15.6986	Underweight range	No	No	Yes	Universities \ schools	1	1	1	1	1	0	1	1	7	0	1	1	0	0	0	1	1	4	1	1	1	1	1	1	1	1	8	2-3 weekly	Never	2-3 weekly	once weekly	2-3 weekly	Never
9:32:17 م 2022/10/25	28-31 years old	4	2	3	8,000 –less than 15,000 SR per month	3	1	5 years	14	110	11.5702	Underweight range	No	Yes	Yes	Social media \ Internet	1	1	0	1	0	0	0	1	4	0	0	1	0	0	0	1	1	3	0	1	1	1	1	1	0	1	6	once /day	once weekly	once or < monthly	4-5 /weekly	4-5 /weekly	Never
9:35:55 م 2022/10/25	32-36 years old	4	1	3	8,000 –less than 15,000 SR per month	3	3	4 years	12	100	12	Underweight range	No	Yes	No		0	0	0	0	0	0	0	1	1	0	0	1	1	1	1	0	1	5	1	1	1	0	0	1	1	1	6	once weekly	once weekly	2-3 weekly	2-3 weekly	Never	once or < monthly
9:36:58 م 2022/10/25	32-36 years old	2	1	1	4,000 – less than 8,000 SR per month	3	1	5 years	14	50	56	Obesity range	No	Yes	No		0	0	0	0	0	0	0	1	1	0	0	0	0	0	1	1	1	3	1	1	0	0	1	1	1	0	5	4-5 /weekly	4-5 /weekly	4-5 /weekly	Never	Never	Never
9:39:42 م 2022/10/25	32-36 years old	4	1	1	Under 4,000 SR per month	3	2	5 years	13	92	15.3592	Underweight range	Yes	Yes	No		1	1	1	1	1	1	1	1	8	1	0	1	0	0	0	0	1	3	0	0	0	0	0	0	1	0	1	4-5 /weekly	once or < monthly	4-5 /weekly	once or < monthly	more than once/day	Never
10:47:47 م 2022/10/25	28-31 years old	4	1	3	8,000 –less than 15,000 SR per month	4	1	3 years	8	80	12.5	Underweight range	I don't no	Yes	No		1	1	1	1	1	1	1	1	8	0	1	1	1	0	0	0	1	4	1	1	1	1	1	1	0	1	7	once /day	4-5 /weekly	once /day	once /day	once /day	2-3 weekly
11:30:16 م 2022/10/25	Above 46 years old	2	1	3	8,000 –less than 15,000 SR per month	1	more than 3	5 years	17	98	17.701	Underweight range	Yes	Yes	Yes	Social media \ Internet	1	0	0	1	0	0	1	0	3	0	0	1	1	0	0	1	1	4	0	1	0	1	1	1	0	0	4	more than once/day	once /day	more than once/day	once /day	more than once/day	4-5 /weekly
11:35:12 م 2022/10/25	28-31 years old	4	1	3	8,000 –less than 15,000 SR per month	2	1	5 years	14	110	11.5702	Underweight range	No	No	Yes	Universities \ schools	1	1	1	1	1	1	1	1	8	0	0	1	1	0	0	1	1	4	1	1	1	1	1	1	1	1	8	once /day	2-3 weekly	4-5 /weekly	2-3 weekly	4-5 /weekly	once or < monthly
12:02:10 ص 2022/10/26	42-46 years old	2	1	3	4,000 – less than 8,000 SR per month	1	2	5 years	15	100	15	Underweight range	Yes	Yes	Yes	Ministry of Health \ Food and Drug Administration	1	1	0	0	0	0	1	1	4	0	0	1	0	1	1	0	1	4	1	1	1	1	0	0	1	1	6	more than once/day	more than once/day	2-3 weekly	2-3 weekly	once weekly	more than once/day
12:28:25 ص 2022/10/26	28-31 years old	4	1	3	4,000 – less than 8,000 SR per month	3	2	5 years	16	80	25	Healthy weight range	Yes	Yes	Yes	Conferences and symposia	1	1	1	1	1	1	1	1	8	0	0	1	1	0	0	1	1	4	1	1	1	1	1	1	1	1	8	once /day	2-3 weekly	4-5 /weekly	once or < monthly	once /day	Never
1:07:27 ص 2022/10/26	28-31 years old	4	1	1	4,000 – less than 8,000 SR per month	1	1	4 years	13	I don't no	Missing data	Missing data	No	Yes	No		0	0	0	1	0	0	0	1	2	0	0	1	0	1	1	1	1	5	1	1	1	1	1	1	0	1	7	2-3 weekly	2-3 weekly	4-5 /weekly	once weekly	Never	once weekly
2:33:01 ص 2022/10/26	32-36 years old	4	1	2	8,000 –less than 15,000 SR per month	3	2	5 years	23	120	15.9722	Underweight range	No	Yes	Yes	Social media \ Internet	1	1	1	1	1	1	1	1	8	0	0	0	0	0	0	1	1	2	1	1	1	1	1	1	0	1	7	once /day	once /day	once /day	once /day	once or < monthly	once weekly
7:26:36 ص 2022/10/26	28-31 years old	4	1	3	15,000 – less than 25,000 SR per month	1	1	5 years	18	0	Missing data	Missing data	No	No	Yes	Social media \ Internet	1	1	0	1	0	0	0	1	4	0	1	1	1	0	0	1	1	5	1	1	1	1	1	1	0	1	7	once /day	once weekly	once weekly	once /day	once /day	once weekly
7:37:03 ص 2022/10/26	28-31 years old	3	1	3	8,000 –less than 15,000 SR per month	1	1	5 years	18	114	13.8504	Underweight range	I don't no	Yes	Yes	TV/radio	0	1	1	1	0	0	0	0	3	0	0	1	1	0	0	0	1	3	1	1	1	1	1	1	1	0	7	2-3 weekly	once /day	once /day	2-3 weekly	2-3 weekly	2-3 weekly
7:55:20 ص 2022/10/26	23-27 years old	2	1	3	8,000 –less than 15,000 SR per month	1	2	3 years	12	60	33.3333	Obesity range	I don't no	No	No		1	1	0	1	1	1	1	1	7	1	0	0	0	1	1	1	1	5	1	1	1	1	1	1	1	1	8	2-3 weekly	once weekly	once weekly	once /day	once /day	Never
8:28:17 ص 2022/10/26	37-41 years old	4	1	2	8,000 –less than 15,000 SR per month	1	1	3 years	11	I don't no	Missing data	Missing data	No	No	Yes	All of the above	1	1	0	1	1	0	0	1	5	1	0	0	0	1	1	0	1	4	1	1	1	1	1	1	1	1	8	once /day	once /day	once /day	once /day	once /day	Never
10:18:07 ص 2022/10/26	28-31 years old	4	1	3	4,000 – less than 8,000 SR per month	4	1	5 years	16	90	19.7531	Healthy weight range	No	Yes	Yes	Social media \ Internet	1	1	1	1	1	1	1	1	8	1	0	1	0	1	1	0	1	5	1	1	1	1	1	1	1	1	8	once /day	once /day	once /day	once /day	once /day	once /day
3:01:49 م 2022/10/26	37-41 years old	2	1	3	8,000 –less than 15,000 SR per month	1	1	5 years	20	109	16.8336	Underweight range	No	No	No		0	0	0	0	0	0	1	0	1	0	0	1	0	0	0	1	1	3	0	1	0	0	0	0	0	0	1	once /day	2-3 weekly	2-3 weekly	once or < monthly	once /day	Never
8:06:57 م 2022/10/26	42-46 years old	4	1	2	15,000 – less than 25,000 SR per month	1	more than 3	3 years	30	36	Missing data	Missing data	No	No	No		0	0	0	0	0	0	0	0	0	0	0	1	1	0	0	0	1	3	0	1	0	0	0	0	0	1	2	once /day	once /day	once /day	4-5 /weekly	more than once/day	more than once/day
8:43:05 م 2022/10/26	23-27 years old	3	1	3	8,000 –less than 15,000 SR per month	1	3	3 years	19	110	15.7025	Underweight range	No	No	Yes	Social media \ Internet	0	1	1	1	1	0	1	1	6	1	0	1	0	0	0	1	0	3	1	1	1	0	1	1	1	0	6	once /day	2-3 weekly	2-3 weekly	once weekly	2-3 weekly	Never
8:46:55 م 2022/10/26	32-36 years old	2	1	3	4,000 – less than 8,000 SR per month	4	2	4 years	14	74	25.5661	Overweight range	No	Yes	Yes	Social media \ Internet	1	1	0	1	1	1	1	1	7	0	0	1	0	1	1	1	1	5	1	1	1	1	1	1	1	1	8	once /day	4-5 /weekly	4-5 /weekly	once /day	2-3 weekly	once or < monthly
9:51:09 م 2022/10/26	28-31 years old	4	1	3	8,000 –less than 15,000 SR per month	3	1	3 years	14	90	17.284	Underweight range	No	No	No		1	1	1	1	1	1	1	1	8	0	0	1	0	0	0	0	1	2	0	0	1	1	1	1	0	0	4	2-3 weekly	once weekly	once or < monthly	once weekly	Never	2-3 weekly
11:33:48 م 2022/10/26	37-41 years old	3	1	3	8,000 –less than 15,000 SR per month	3	1	5 years	15	115	11.3422	Underweight range	No	No	Yes	Social media \ Internet	1	1	1	1	1	1	1	1	8	1	1	1	0	1	1	1	1	7	1	1	1	1	1	1	1	0	7	once /day	once /day	once /day	once /day	once /day	once /day
12:56:23 ص 2022/10/27	Above 46 years old	2	1	3	8,000 –less than 15,000 SR per month	1	1	5 years	20	110	16.5289	Underweight range	Yes	Yes	Yes	View and read the content of materials	1	1	1	1	1	1	1	1	8	0	0	1	1	1	1	1	1	6	1	1	1	1	1	1	0	0	6	once /day	once /day	more than once/day	once /day	once /day	once /day
1:47:44 ص 2022/10/30	32-36 years old	4	1	3	8,000 –less than 15,000 SR per month	1	2	3 years	17	100	17	Underweight range	No	No	No		0	0	0	0	0	0	0	0	0	0	0	0	1	0	0	0	1	2	0	0	0	0	0	0	0	1	1	once /day	once /day	once /day	2-3 weekly	4-5 /weekly	once weekly
3:14:04 م 2022/10/31	23-27 years old	4	1	1	Under 4,000 SR per month	1	1	5 years	16	105	14.5125	Underweight range	No	Yes	No		0	1	1	1	0	0	1	1	5	1	0	1	0	0	1	0	1	4	1	1	1	1	1	1	1	0	7	once /day	once weekly	once or < monthly	once /day	once /day	Never
11:18:35 ص 2022/11/06	42-46 years old	5	1	2	15,000 – less than 25,000 SR per month	3	1	5 years	17	122	11.4217	Underweight range	No	No	Yes	Social media \ Internet	1	1	1	0	1	1	1	1	7	1	0	1	0	1	1	1	1	6	1	1	1	1	1	1	0	0	6	once /day	once weekly	once weekly	more than once/day	once weekly	once weekly
11:25:47 ص 2022/11/06	28-31 years old	5	1	2	8,000 –less than 15,000 SR per month	3	1	3 years	13	50	52	Obesity range	No	No	Yes	Social media \ Internet	1	1	1	1	1	1	1	1	8	0	1	1	1	0	1	1	1	6	1	1	1	1	1	1	0	1	7	once /day	once /day	once /day	once /day	once /day	once /day
11:32:38 ص 2022/11/06	37-41 years old	4	1	2	8,000 –less than 15,000 SR per month	1	1	5 years	15	I don't no	Missing data	Missing data	Yes	Yes	Yes	Universities \ schools	1	0	1	1	0	0	0	1	4	0	0	1	0	1	0	0	1	3	1	1	1	1	1	1	0	0	6	once weekly	2-3 weekly	once weekly	2-3 weekly	4-5 /weekly	Never
12:46:16 م 2022/11/06	32-36 years old	5	1	2	8,000 –less than 15,000 SR per month	7	1	3 years	18	I don't no	Missing data	Missing data	No	No	No		0	0	1	1	1	0	0	0	3	0	0	0	0	0	0	0	1	1	1	1	1	0	1	1	0	1	6	once /day	4-5 /weekly	4-5 /weekly	once weekly	more than once/day	Never
6:13:45 م 2022/11/06	32-36 years old	5	1	2	8,000 –less than 15,000 SR per month	6	3	5 years	15.5	100	15.5	Underweight range	No	No	Yes	Ministry of Health \ Food and Drug Administration	1	1	1	1	1	1	1	1	8	0	1	1	1	0	0	0	1	4	1	1	1	1	1	1	0	1	7	more than once/day	4-5 /weekly	4-5 /weekly	once /day	once /day	once /day
10:53:24 ص 2022/11/07	42-46 years old	4	1	2	8,000 –less than 15,000 SR per month	6	2	5 years	17	94	19.2395	Healthy weight range	No	Yes	Yes	Social media \ Internet	1	1	1	1	1	1	1	1	8	0	1	1	1	0	0	0	1	4	1	1	1	1	1	1	0	1	7	more than once/day	2-3 weekly	once or < monthly	more than once/day	2-3 weekly	Never
11:59:16 ص 2022/11/07	28-31 years old	4	1	2	8,000 –less than 15,000 SR per month	6	1	4 years	20	110	16.5289	Underweight range	I don't no	Yes	No		0	1	0	1	0	0	1	0	3	0	0	1	0	1	1	1	1	5	1	1	1	0	0	1	0	0	4	once /day	more than once/day	once weekly	once weekly	once /day	once weekly
12:28:09 م 2022/11/07	37-41 years old	1	1	3	15,000 – less than 25,000 SR per month	6	1	5 years	16	82	23.7954	Healthy weight range	No	No	No		1	0	0	0	0	0	1	0	2	0	1	0	1	0	0	0	1	3	1	1	1	1	1	1	1	1	8	once /day	once /day	once /day	once /day	once /day	once /day
12:50:26 م 2022/11/07	28-31 years old	5	1	2	4,000 – less than 8,000 SR per month	6	1	4 years	17	90	20.9877	Healthy weight range	No	No	Yes	Ministry of Health \ Food and Drug Administration	1	1	1	1	1	1	1	1	8	1	1	1	1	1	1	1	1	8	1	1	1	1	1	1	1	1	8	2-3 weekly	2-3 weekly	2-3 weekly	2-3 weekly	2-3 weekly	2-3 weekly
10:24:49 م 2022/11/07	32-36 years old	5	1	2	8,000 –less than 15,000 SR per month	1	1	5 years	13	I don't no	Missing data	Missing data	No	Yes	Yes	Social media \ Internet	1	1	1	1	0	0	1	0	5	0	0	1	0	1	0	0	1	3	0	1	1	1	0	1	0	0	4	once /day	4-5 /weekly	4-5 /weekly	2-3 weekly	once /day	2-3 weekly
1:34:14 ص 2022/11/08	32-36 years old	4	1	3	8,000 –less than 15,000 SR per month	4	1	3 years	17	100	17	Underweight range	I don't no	No	Yes	Social media \ Internet	1	1	0	1	0	1	1	1	6	0	0	1	0	1	1	0	1	4	1	1	1	1	1	1	1	1	8	2-3 weekly	2-3 weekly	2-3 weekly	more than once/day	more than once/day	once /day
10:02:32 ص 2022/11/08	28-31 years old	4	1	1	4,000 – less than 8,000 SR per month	3	1	4 years	12	100	12	Underweight range	No	No	No		0	0	0	0	0	0	0	1	1	0	0	0	0	1	1	1	1	4	1	1	1	1	1	1	1	0	7	once /day	once /day	once weekly	Never	Never	once or < monthly
12:39:02 م 2022/11/08	37-41 years old	4	1	3	8,000 –less than 15,000 SR per month	3	1	3 years	13	60	36.1111	Obesity range	I don't no	No	No		1	1	1	1	1	1	1	1	8	0	0	1	0	1	1	0	1	4	0	0	1	1	1	1	0	1	5	more than once/day	4-5 /weekly	more than once/day	4-5 /weekly	Never	Never
12:43:10 م 2022/11/08	32-36 years old	2	1	3	Under 4,000 SR per month	3	1	5 years	19	75	33.7778	Obesity range	No	No	No		0	0	0	0	0	0	0	0	0	0	0	0	0	0	0	0	0	0	0	0	0	0	1	0	0	1	2	once /day	once /day	once /day	Never	once /day	once /day
12:49:25 م 2022/11/08	32-36 years old	5	1	2	Above 25,000 SR per month	1	2	5 years	20	116	14.8633	Underweight range	No	No	Yes	Universities \ schools	1	1	1	0	1	1	1	1	7	0	0	1	0	0	0	0	1	2	1	1	1	1	1	1	1	1	8	once or < monthly	2-3 weekly	2-3 weekly	once weekly	2-3 weekly	once or < monthly
1:11:09 م 2022/11/08	32-36 years old	4	1	3	8,000 –less than 15,000 SR per month	1	1	3 years	14	100	14	Underweight range	No	No	Yes	Social media \ Internet	1	1	0	1	1	1	1	0	6	0	0	1	0	0	0	0	1	2	1	1	0	0	1	1	0	1	5	once /day	once /day	once /day	2-3 weekly	once or < monthly	once or < monthly
3:06:01 م 2022/11/08	23-27 years old	4	1	3	4,000 – less than 8,000 SR per month	4	1	5 years	15.5	I don't no	Missing data	Missing data	No	No	Yes	Social media \ Internet	1	1	1	1	1	1	0	1	7	0	0	1	0	0	0	1	1	3	0	1	1	1	1	1	1	1	7	2-3 weekly	2-3 weekly	once weekly	Never	once /day	2-3 weekly
6:59:42 م 2022/11/08	23-27 years old	4	1	2	4,000 – less than 8,000 SR per month	3	1	3 years	14	80	21.875	Healthy weight range	No	No	Yes	Newspapers and magazines	1	1	1	0	0	0	1	1	5	0	0	1	0	0	0	1	1	3	1	1	1	1	1	1	0	0	6	once or < monthly	once or < monthly	once weekly	4-5 /weekly	4-5 /weekly	Never
7:54:02 م 2022/11/08	28-31 years old	5	1	3	4,000 – less than 8,000 SR per month	1	1	4 years	16.5	109	13.8877	Underweight range	No	No	Yes	Social media \ Internet	1	0	0	0	0	0	0	1	2	0	0	0	0	0	0	0	1	1	0	1	1	1	1	1	1	1	7	once or < monthly	once or < monthly	once /day	once /day	4-5 /weekly	Never
8:28:55 م 2022/11/08	32-36 years old	4	1	2	Above 25,000 SR per month	1	1	4 years	19	92	22.448	Healthy weight range	Yes	No	Yes	Social media \ Internet	1	1	1	1	1	1	1	1	8	0	0	1	0	1	1	0	1	4	1	1	1	1	1	1	0	1	7	once /day	once /day	once /day	once /day	Never	Never
10:37:45 م 2022/11/08	32-36 years old	2	1	3	Under 4,000 SR per month	1	1	3 years	15	I don't no	Missing data	Missing data	No	No	No		1	1	0	0	0	0	0	0	2	1	0	0	1	0	0	1	1	4	1	1	1	1	0	1	1	0	6	4-5 /weekly	2-3 weekly	2-3 weekly	2-3 weekly	4-5 /weekly	once or < monthly
11:02:14 م 2022/11/08	32-36 years old	4	1	2	8,000 –less than 15,000 SR per month	1	1	4 years	17	100	17	Underweight range	No	No	No		1	1	1	1	1	1	1	0	7	1	0	1	0	1	1	1	1	6	1	1	1	1	1	1	1	1	8	once weekly	once weekly	once or < monthly	once or < monthly	4-5 /weekly	once weekly
3:22:26 ص 2022/11/09	28-31 years old	5	1	4	8,000 –less than 15,000 SR per month	1	1	3 years	13	88	16.7872	Underweight range	No	No	Yes	Social media \ Internet	1	1	0	0	1	1	1	1	6	1	0	1	0	0	0	1	1	4	1	1	1	1	1	1	0	1	7	4-5 /weekly	2-3 weekly	4-5 /weekly	2-3 weekly	Never	once or < monthly
7:26:34 ص 2022/11/09	32-36 years old	3	1	3	15,000 – less than 25,000 SR per month	1	1	5 years	22	117	16.0713	Underweight range	No	No	No		1	1	0	0	1	1	0	1	5	1	0	0	0	1	1	1	1	5	1	1	1	1	1	1	0	1	7	once or < monthly	once or < monthly	2-3 weekly	once or < monthly	once or < monthly	once or < monthly
3:11:51 م 2022/11/09	28-31 years old	4	1	3	8,000 –less than 15,000 SR per month	6	1	5 years	18.5	110	15.2893	Underweight range	No	No	Yes	Ministry of Health \ Food and Drug Administration	0	0	0	0	0	0	0	0	0	1	0	0	0	0	0	0	1	2	1	1	1	1	1	1	0	1	7	4-5 /weekly	once /day	once /day	once /day	once /day	once /day
7:11:18 م 2022/11/09	32-36 years old	4	1	2	8,000 –less than 15,000 SR per month	2	1	5 years	15	60	41.6667	Obesity range	No	Yes	No		0	0	1	1	0	0	1	1	4	0	0	0	1	1	1	1	1	5	1	1	1	1	1	1	0	0	6	more than once/day	once /day	more than once/day	once /day	once /day	once /day
7:19:09 م 2022/11/09	23-27 years old	2	1	3	8,000 –less than 15,000 SR per month	2	1	5 years	16	90	19.7531	Healthy weight range	No	Yes	No		0	0	0	0	0	0	0	0	0	1	0	0	1	1	1	1	1	6	1	1	1	1	1	0	0	1	6	more than once/day	once /day	once /day	once /day	once /day	once /day
7:30:33 م 2022/11/09	18-22 years old	4	1	3	8,000 –less than 15,000 SR per month	2	3	3 years	14	120	9.72222	Underweight range	No	No	Yes	Social media \ Internet	1	1	0	0	0	0	0	1	3	1	1	1	0	1	1	0	1	6	1	1	1	1	1	1	1	1	8	once weekly	once weekly	once weekly	Never	once weekly	Never
9:28:21 م 2022/11/09	28-31 years old	2	1	3	4,000 – less than 8,000 SR per month	2	2	3 years	13.5	90	16.6667	Underweight range	No	No	Yes	Social media \ Internet	1	0	1	1	0	0	1	1	5	0	0	1	0	1	0	0	1	3	1	1	1	1	1	1	0	1	7	2-3 weekly	once /day	2-3 weekly	once /day	once /day	once /day
9:31:18 م 2022/11/09	37-41 years old	4	1	2	8,000 –less than 15,000 SR per month	2	2	5 years	17	100	17	Underweight range	No	Yes	Yes	Universities \ schools	1	1	1	1	1	1	1	1	8	0	1	1	1	1	0	0	1	5	1	1	1	1	1	1	0	1	7	more than once/day	once /day	once /day	4-5 /weekly	once /day	once or < monthly
12:11:55 ص 2022/11/10	42-46 years old	3	1	3	15,000 – less than 25,000 SR per month	2	2	5 years	15	80	23.4375	Healthy weight range	No	No	Yes	Social media \ Internet	1	1	0	0	1	1	1	1	6	1	0	1	0	0	0	1	1	4	0	1	1	1	1	1	0	1	6	more than once/day	more than once/day	more than once/day	Never	once /day	once /day
10:30:40 ص 2022/11/13	42-46 years old	5	1	2	15,000 – less than 25,000 SR per month	1	1	5 years	16	110	13.2231	Underweight range	No	No	Yes	Ministry of Health \ Food and Drug Administration	1	1	1	1	1	1	1	1	8	0	1	1	0	1	0	1	1	5	1	1	1	1	1	1	0	1	7	once /day	once /day	once /day	once /day	4-5 /weekly	4-5 /weekly
3:57:10 م 2022/11/13	23-27 years old	2	1	3	4,000 – less than 8,000 SR per month	4	3	3 years	12	I don't no	Missing data	Missing data	No	No	No		0	0	0	1	0	0	1	0	2	0	0	0	0	1	1	0	1	3	1	1	1	1	1	1	1	0	7	once /day	2-3 weekly	once /day	2-3 weekly	more than once/day	2-3 weekly
4:07:16 م 2022/11/13	23-27 years old	4	1	3	15,000 – less than 25,000 SR per month	4	1	3 years	14	180	4.32099	Underweight range	No	No	Yes	Social media \ Internet	1	1	0	0	0	0	0	1	3	0	1	1	0	0	0	0	1	3	1	1	1	1	1	1	0	1	7	once weekly	once /day	once /day	more than once/day	more than once/day	once /day
4:09:07 م 2022/11/13	32-36 years old	2	1	3	8,000 –less than 15,000 SR per month	6	1	5 years	18	120	12.5	Underweight range	No	No	No		0	0	1	1	0	0	1	1	4	0	0	1	1	0	0	1	1	4	1	1	1	1	1	1	0	1	7	more than once/day	4-5 /weekly	4-5 /weekly	once /day	4-5 /weekly	2-3 weekly
4:23:19 م 2022/11/13	28-31 years old	2	1	3	4,000 – less than 8,000 SR per month	6	1	5 years	20	100	20	Healthy weight range	Yes	Yes	No		0	1	0	0	0	0	1	1	3	0	0	1	1	1	1	0	1	5	0	1	1	1	1	1	1	1	7	once or < monthly	once or < monthly	once or < monthly	once or < monthly	once or < monthly	once or < monthly
4:26:04 م 2022/11/13	42-46 years old	2	1	3	15,000 – less than 25,000 SR per month	6	1	5 years	17	20	Missing data	Missing data	Yes	Yes	Yes	Social media \ Internet	1	1	1	1	1	1	1	1	8	0	0	1	0	0	0	0	1	2	1	1	1	1	1	1	1	0	7	once /day	once /day	2-3 weekly	once or < monthly	4-5 /weekly	Never
4:41:59 م 2022/11/13	32-36 years old	4	1	2	Under 4,000 SR per month	3	3	3 years	5	80	Missing data	Missing data	No	No	No		0	0	0	1	0	0	0	1	2	0	0	1	1	0	0	0	1	3	1	1	1	1	1	1	0	1	7	4-5 /weekly	once /day	4-5 /weekly	once weekly	Never	once or < monthly
4:45:08 م 2022/11/13	23-27 years old	2	1	3	4,000 – less than 8,000 SR per month	4	1	3 years	14	85	19.3772	Healthy weight range	No	No	Yes	Ministry of Health \ Food and Drug Administration	1	1	0	1	0	0	1	1	5	1	0	0	0	1	0	0	1	3	1	1	1	1	1	1	1	1	8	once weekly	once or < monthly	once weekly	once weekly	2-3 weekly	Never
5:10:15 م 2022/11/13	23-27 years old	2	1	3	4,000 – less than 8,000 SR per month	4	1	3 years	3	20	Missing data	Missing data	I don't no	No	No		0	0	1	1	1	1	1	1	6	1	1	1	0	1	1	1	1	7	1	1	1	1	1	1	1	1	8	2-3 weekly	4-5 /weekly	once or < monthly	4-5 /weekly	4-5 /weekly	Never
7:48:55 م 2022/11/13	23-27 years old	2	1	3	4,000 – less than 8,000 SR per month	1	1	3 years	29	105	26.3039	Overweight range	Yes	No	No		0	0	0	0	0	0	0	0	0	0	0	1	0	0	1	0	0	2	0	0	0	0	0	0	1	0	1	Never	4-5 /weekly	once /day	once or < monthly	more than once/day	once weekly
8:58:03 م 2022/11/13	28-31 years old	4	1	3	8,000 –less than 15,000 SR per month	3	1	4 years	15.5	105	14.059	Underweight range	Yes	No	Yes	Social media \ Internet	1	1	1	1	1	1	1	1	8	1	1	0	0	1	1	1	1	6	1	1	1	1	1	1	1	1	8	2-3 weekly	4-5 /weekly	once weekly	once weekly	once weekly	Never
9:00:13 م 2022/11/13	42-46 years old	4	1	2	8,000 –less than 15,000 SR per month	3	1	3 years	13	70	26.5306	Overweight range	No	No	Yes	Social media \ Internet	1	1	1	1	1	1	1	1	8	0	0	1	1	1	1	1	1	6	1	1	0	1	1	1	0	1	6	once weekly	4-5 /weekly	once /day	2-3 weekly	once /day	2-3 weekly
9:49:46 م 2022/11/13	32-36 years old	2	1	3	8,000 –less than 15,000 SR per month	3	3	5 years	20	112	15.9439	Underweight range	I don't no	Yes	No		0	0	0	1	1	1	1	1	5	0	0	0	1	0	0	0	1	2	1	1	1	1	1	1	0	1	7	4-5 /weekly	2-3 weekly	4-5 /weekly	once /day	once /day	once weekly
10:08:52 م 2022/11/13	32-36 years old	1	1	3	Under 4,000 SR per month	4	1	3 years	17	20	Missing data	Missing data	I don't no	Yes	No		1	1	1	1	1	1	1	1	8	1	0	0	1	1	1	0	1	5	1	1	1	1	1	1	0	1	7	more than once/day	more than once/day	more than once/day	more than once/day	more than once/day	more than once/day
10:50:17 م 2022/11/13	28-31 years old	4	1	3	4,000 – less than 8,000 SR per month	3	1	4 years	13	I don't no	Missing data	Missing data	No	No	Yes	Family and friends	1	1	0	0	0	0	1	1	4	0	0	1	0	0	0	0	1	2	0	1	1	1	1	1	1	0	6	once /day	once or < monthly	once or < monthly	once /day	once /day	Never
11:03:23 م 2022/11/13	28-31 years old	3	1	3	4,000 – less than 8,000 SR per month	2	1	3 years	14	118	10.0546	Underweight range	No	No	Yes	Ministry of Health \ Food and Drug Administration	1	1	0	1	1	0	1	1	6	0	1	1	1	0	0	0	1	4	1	1	1	1	1	1	0	1	7	once or < monthly	once weekly	once or < monthly	4-5 /weekly	2-3 weekly	Never
11:21:38 م 2022/11/13	23-27 years old	5	1	4	8,000 –less than 15,000 SR per month	1	1	3 years	18	95	19.9446	Healthy weight range	Yes	No	Yes	Ministry of Health \ Food and Drug Administration	1	1	1	1	1	1	1	0	7	1	0	1	0	1	1	1	1	6	1	1	1	1	1	1	1	1	8	once weekly	once weekly	2-3 weekly	2-3 weekly	Never	Never
11:36:03 م 2022/11/13	28-31 years old	4	1	3	15,000 – less than 25,000 SR per month	1	1	4 years	15	90	18.5185	Healthy weight range	Yes	No	Yes	Social media \ Internet	1	1	1	1	1	1	1	1	8	0	1	1	0	0	1	0	1	4	1	1	1	1	1	1	1	1	8	2-3 weekly	once weekly	once weekly	once weekly	once or < monthly	once or < monthly
12:35:34 ص 2022/11/14	28-31 years old	4	1	2	8,000 –less than 15,000 SR per month	3	2	5 years	16	110	13.2231	Underweight range	No	Yes	Yes	Social media \ Internet	1	1	1	1	1	1	0	1	7	0	0	0	0	1	0	1	1	3	1	1	1	1	1	1	0	1	7	4-5 /weekly	2-3 weekly	2-3 weekly	Never	once or < monthly	once or < monthly
2:07:06 ص 2022/11/14	28-31 years old	5	1	2	15,000 – less than 25,000 SR per month	1	1	3 years	13	93	15.0306	Underweight range	No	No	Yes	Ministry of Health \ Food and Drug Administration	1	1	1	1	1	1	1	1	8	0	1	1	1	1	0	0	1	5	1	1	1	1	1	1	1	1	8	2-3 weekly	once or < monthly	2-3 weekly	once /day	once /day	2-3 weekly
2:21:47 ص 2022/11/14	32-36 years old	4	1	3	8,000 –less than 15,000 SR per month	6	2	5 years	I don’t know (normal)	I don't no	Missing data	Missing data	No	Yes	Yes	Social media \ Internet	1	1	1	1	1	1	1	1	8	1	0	1	0	1	0	1	1	5	1	1	1	1	1	1	1	1	8	once /day	once weekly	once /day	once /day	more than once/day	Never
2:23:06 ص 2022/11/14	28-31 years old	5	1	4	8,000 –less than 15,000 SR per month	1	2	5 years	13	120	9.02778	Underweight range	No	No	Yes	TV/radio	1	1	1	1	0	0	1	1	6	0	0	1	1	0	0	0	1	3	1	1	0	0	0	1	0	1	4	4-5 /weekly	4-5 /weekly	2-3 weekly	2-3 weekly	4-5 /weekly	2-3 weekly
1:38:14 م 2022/11/14	28-31 years old	4	1	3	Under 4,000 SR per month	1	1	4 years	14	I don't no	Missing data	Missing data	No	No	No		0	0	0	0	0	0	0	1	1	0	0	1	0	0	0	0	1	2	0	1	1	1	1	1	0	1	6	4-5 /weekly	2-3 weekly	4-5 /weekly	2-3 weekly	Never	Never
1:39:16 م 2022/11/14	32-36 years old	4	1	2	4,000 – less than 8,000 SR per month	1	1	3 years	11.6	81	17.6802	Underweight range	Yes	No	No		1	1	1	1	0	0	0	1	5	0	0	1	1	1	1	1	1	6	1	1	1	1	1	1	0	1	7	once /day	2-3 weekly	once /day	once /day	once /day	Never
4:04:36 م 2022/11/14	28-31 years old	4	1	3	8,000 –less than 15,000 SR per month	1	1	4 years	15	98	15.6185	Underweight range	No	No	Yes	Social media \ Internet	1	1	1	0	1	1	1	1	7	1	1	1	0	0	0	1	1	5	1	1	1	1	1	1	0	1	7	2-3 weekly	once or < monthly	2-3 weekly	more than once/day	more than once/day	Never
4:28:47 م 2022/11/14	32-36 years old	2	1	1	8,000 –less than 15,000 SR per month	1	1	4 years	16	90	19.7531	Healthy weight range	I don't no	No	No		1	1	1	1	0	0	1	1	6	1	0	1	0	1	1	1	1	6	1	1	1	1	1	1	1	1	8	more than once/day	once /day	once /day	more than once/day	more than once/day	once weekly
12:21:37 ص 2022/11/15	37-41 years old	4	1	3	8,000 –less than 15,000 SR per month	3	1	5 years	14	100	14	Underweight range	Yes	Yes	Yes	Social media \ Internet	1	1	1	1	1	1	1	1	8	0	0	1	0	1	0	0	1	3	1	1	1	1	1	1	0	1	7	more than once/day	more than once/day	more than once/day	once /day	once /day	once /day
10:02:30 ص 2022/11/15	28-31 years old	4	2	3	Under 4,000 SR per month	4	1	5 years	15	I don't no	Missing data	Missing data	No	Yes	No		0	0	0	0	0	0	1	1	2	1	1	1	0	1	1	1	1	7	1	1	1	1	1	1	1	1	8	2-3 weekly	once weekly	Never	Never	4-5 /weekly	once weekly
6:20:46 ص 2022/11/19	Above 46 years old	4	1	3	8,000 –less than 15,000 SR per month	1	1	3 years	10.5	87	13.8724	Underweight range	No	No	Yes	Social media \ Internet	1	1	1	1	1	1	1	1	8	0	0	1	0	1	0	1	1	4	1	1	1	1	1	1	0	1	7	2-3 weekly	once weekly	once or < monthly	Never	Never	once or < monthly
5:56:52 م 2022/11/19	42-46 years old	4	1	3	Above 25,000 SR per month	1	1	4 years	15	98	15.6185	Underweight range	No	No	Yes	Social media \ Internet	1	1	1	0	0	0	1	1	5	0	1	0	0	1	1	0	1	4	1	1	1	1	1	1	0	1	7	2-3 weekly	once weekly	2-3 weekly	2-3 weekly	2-3 weekly	once or < monthly
5:27:50 م 2022/11/21	37-41 years old	4	1	2	8,000 –less than 15,000 SR per month	4	1	4 years	13	99	13.264	Underweight range	No	No	Yes	Newspapers and magazines	1	1	1	1	1	1	0	0	6	0	0	1	0	0	0	0	1	2	1	1	1	0	1	1	0	1	6	once /day	once /day	once /day	once /day	once /day	once /day
8:30:23 م 2022/11/21	32-36 years old	2	1	3	8,000 –less than 15,000 SR per month	4	1	5 years	15	20	Missing data	Missing data	Yes	No	Yes	Ministry of Health \ Food and Drug Administration	1	1	1	1	0	1	1	1	7	0	0	1	1	0	1	0	1	4	1	1	1	0	1	1	0	0	5	once /day	once /day	4-5 /weekly	4-5 /weekly	2-3 weekly	4-5 /weekly
10:00:03 م 2022/11/27	23-27 years old	4	1	3	4,000 – less than 8,000 SR per month	1	2	3 years	10	75	17.7778	Underweight range	No	No	No		1	1	0	1	1	1	1	1	7	0	1	1	1	1	1	1	1	7	1	1	1	1	1	1	0	1	7	more than once/day	4-5 /weekly	4-5 /weekly	4-5 /weekly	once /day	more than once/day
10:03:17 م 2022/11/27	23-27 years old	4	1	3	8,000 –less than 15,000 SR per month	1	1	5 years	13	105	11.7914	Underweight range	No	Yes	No		0	0	0	1	0	0	1	1	3	0	1	0	1	0	0	0	1	3	1	1	1	1	1	1	0	1	7	2-3 weekly	4-5 /weekly	2-3 weekly	once or < monthly	once or < monthly	4-5 /weekly
10:04:37 م 2022/11/27	28-31 years old	4	1	3	8,000 –less than 15,000 SR per month	1	2	5 years	22	120	15.2778	Underweight range	No	Yes	No		0	1	1	0	1	1	1	1	6	0	0	1	0	0	0	1	1	3	1	1	1	1	0	1	0	1	6	once /day	once /day	once weekly	2-3 weekly	Never	Never
10:09:16 م 2022/11/27	37-41 years old	4	1	2	8,000 –less than 15,000 SR per month	1	1	5 years	22	51	84.5829	Obesity range	No	Yes	Yes	Ministry of Health \ Food and Drug Administration	1	1	1	1	1	1	1	0	7	0	0	1	1	0	0	1	1	4	1	0	0	0	0	1	0	1	3	more than once/day	more than once/day	more than once/day	4-5 /weekly	once /day	once /day
10:20:14 م 2022/11/27	32-36 years old	5	1	2	8,000 –less than 15,000 SR per month	1	1	5 years	19.8	I don't no	Missing data	Missing data	No	No	Yes	Conferences and symposia	1	1	1	0	1	1	0	1	6	1	0	1	0	0	0	1	1	4	1	1	1	1	1	1	1	1	8	once /day	once /day	once weekly	2-3 weekly	2-3 weekly	Never
10:28:02 م 2022/11/27	42-46 years old	1	1	3	Under 4,000 SR per month	1	1	5 years	33	134	18.3783	Underweight range	No	Yes	Yes	Social media \ Internet	1	1	1	1	0	0	0	0	4	1	0	0	0	1	0	0	0	2	0	1	1	1	1	1	0	1	6	more than once/day	once /day	once /day	more than once/day	4-5 /weekly	once /day
10:32:31 م 2022/11/27	28-31 years old	4	1	3	8,000 –less than 15,000 SR per month	1	1	3 years	15	50	60	Obesity range	Yes	No	No		0	0	0	0	0	0	0	0	0	1	0	1	0	0	0	1	1	4	1	1	1	1	1	1	1	1	8	2-3 weekly	2-3 weekly	4-5 /weekly	once /day	2-3 weekly	2-3 weekly
10:43:07 م 2022/11/27	28-31 years old	5	1	2	15,000 – less than 25,000 SR per month	3	more than 3	5 years	17	112	13.5523	Underweight range	I don't no	No	Yes	Conferences and symposia	1	1	1	0	0	0	1	1	5	1	0	0	0	0	0	1	1	3	1	1	1	1	1	1	0	0	6	once /day	once /day	once /day	once /day	once /day	once /day
10:45:36 م 2022/11/27	23-27 years old	2	1	3	Under 4,000 SR per month	1	1	5 years	23	130	13.6095	Underweight range	Yes	Yes	Yes	Ministry of Health \ Food and Drug Administration	1	1	0	1	0	0	0	1	4	1	0	1	0	1	1	0	1	5	1	1	0	1	1	1	0	0	5	more than once/day	more than once/day	more than once/day	more than once/day	more than once/day	more than once/day
10:50:00 م 2022/11/27	37-41 years old	2	3	3	Under 4,000 SR per month	9	more than 3	5 years	20	114	15.3894	Underweight range	No	No	No		0	0	0	1	1	1	0	1	4	1	0	1	0	0	0	1	1	4	1	1	1	1	1	1	0	1	7	once /day	once /day	once /day	once /day	4-5 /weekly	once /day
11:16:37 م 2022/11/27	32-36 years old	4	1	2	8,000 –less than 15,000 SR per month	3	1	5 years	15	I don't no	Missing data	Missing data	No	Yes	No		1	1	0	0	0	0	0	1	3	0	0	0	0	0	0	0	1	1	0	1	1	1	1	1	0	1	6	once /day	once weekly	4-5 /weekly	once weekly	Never	Never
11:50:38 م 2022/11/27	37-41 years old	2	1	3	4,000 – less than 8,000 SR per month	10	1	5 years	22	84	31.1791	Obesity range	No	No	No		0	0	0	0	0	0	0	1	1	0	0	1	0	0	0	0	1	2	0	0	1	1	1	0	1	1	5	more than once/day	once or < monthly	once or < monthly	once or < monthly	Never	Never
12:02:03 ص 2022/11/28	23-27 years old	2	1	3	4,000 – less than 8,000 SR per month	10	3	5 years	14	120	9.72222	Underweight range	No	Yes	Yes	Social media \ Internet	1	1	1	1	0	0	1	1	6	0	0	0	0	1	0	1	1	3	1	1	1	1	1	1	1	0	7	more than once/day	once weekly	once weekly	Never	more than once/day	Never
12:06:24 ص 2022/11/28	28-31 years old	2	1	3	15,000 – less than 25,000 SR per month	1	1	5 years	دز	زا	Missing data	Missing data	No	Yes	Yes	Ministry of Health \ Food and Drug Administration	0	1	0	1	1	0	1	0	4	0	0	0	0	0	0	0	0	0	1	0	1	1	0	0	1	1	5	more than once/day	more than once/day	once /day	more than once/day	more than once/day	once /day
12:12:42 ص 2022/11/28	42-46 years old	5	1	2	15,000 – less than 25,000 SR per month	3	1	5 years	20	100	20	Healthy weight range	Yes	No	Yes	Social media \ Internet	1	0	0	0	1	1	1	1	5	1	0	0	0	0	0	1	1	3	1	1	1	1	1	1	1	1	8	once weekly	once weekly	2-3 weekly	2-3 weekly	4-5 /weekly	once weekly
12:14:04 ص 2022/11/28	42-46 years old	3	1	2	4,000 – less than 8,000 SR per month	1	1	5 years	33	130	19.5266	Healthy weight range	No	No	Yes	Social media \ Internet	0	0	0	1	0	0	1	1	3	1	0	1	0	0	0	0	1	3	1	1	1	1	1	1	0	1	7	once /day	once /day	once /day	once /day	once /day	once /day
12:20:09 ص 2022/11/28	42-46 years old	2	2	3	Under 4,000 SR per month	10	1	5 years	25	88	32.2831	Obesity range	No	No	Yes	Ministry of Health \ Food and Drug Administration	1	1	1	1	0	0	1	1	6	1	0	1	0	0	0	1	1	4	1	1	0	1	1	1	1	0	6	once or < monthly	once or < monthly	once or < monthly	once or < monthly	once or < monthly	once or < monthly
12:31:41 ص 2022/11/28	28-31 years old	1	1	3	Under 4,000 SR per month	11	1	4 years	9	I don't no	Missing data	Missing data	I don't no	Yes	No		0	0	0	0	0	0	1	1	2	0	0	1	1	1	1	1	1	6	0	1	1	1	1	1	1	1	7	once weekly	once /day	once weekly	Never	once /day	once weekly
12:36:20 ص 2022/11/28	37-41 years old	5	1	2	8,000 –less than 15,000 SR per month	1	1	4 years	27	90	33.3333	Obesity range	No	No	Yes	Social media \ Internet	0	1	1	1	1	1	0	1	6	1	0	1	0	1	1	1	1	6	1	1	1	0	1	1	0	0	5	2-3 weekly	once weekly	4-5 /weekly	once /day	once /day	once weekly
12:41:11 ص 2022/11/28	28-31 years old	4	1	3	4,000 – less than 8,000 SR per month	12	2	5 years	16	110	13.2231	Underweight range	Yes	Yes	Yes	Ministry of Health \ Food and Drug Administration	1	1	1	1	1	1	1	1	8	0	0	0	1	0	0	0	1	2	1	0	1	1	1	1	0	1	6	2-3 weekly	2-3 weekly	2-3 weekly	once /day	once or < monthly	once or < monthly
12:47:43 ص 2022/11/28	28-31 years old	4	1	2	8,000 –less than 15,000 SR per month	3	1	5 years	10	80	15.625	Underweight range	No	Yes	Yes	Newspapers and magazines	1	0	0	0	1	1	1	1	5	1	0	0	0	0	0	0	1	2	1	1	1	1	1	1	1	1	8	4-5 /weekly	2-3 weekly	2-3 weekly	4-5 /weekly	4-5 /weekly	once weekly
1:09:31 ص 2022/11/28	23-27 years old	3	1	4	Under 4,000 SR per month	3	1	3 years	12	96	13.0208	Underweight range	I don't no	Yes	Yes	Universities \ schools	1	1	1	1	1	1	1	0	7	0	1	0	1	0	1	1	1	5	1	1	1	1	1	1	1	1	8	2-3 weekly	2-3 weekly	4-5 /weekly	once weekly	once weekly	Never
1:36:37 ص 2022/11/28	18-22 years old	4	1	3	4,000 – less than 8,000 SR per month	11	1	3 years	11	85	15.2249	Underweight range	No	No	No		0	0	0	0	0	0	0	0	0	1	0	0	0	1	1	1	1	5	1	1	1	1	1	1	1	1	8	2-3 weekly	once or < monthly	2-3 weekly	2-3 weekly	2-3 weekly	Never
1:58:06 ص 2022/11/28	Above 46 years old	4	1	2	15,000 – less than 25,000 SR per month	1	1	4 years	18	110	14.876	Underweight range	No	No	Yes	Social media \ Internet	1	1	0	1	0	0	1	1	5	0	1	1	0	0	0	0	1	3	1	1	1	1	1	1	0	1	7	once /day	once weekly	once /day	once or < monthly	once /day	Never
2:37:33 ص 2022/11/28	42-46 years old	4	1	2	4,000 – less than 8,000 SR per month	1	1	3 years	12	22	Missing data	Missing data	No	No	No		0	0	0	0	0	0	1	1	2	1	0	1	0	1	1	1	1	6	1	1	1	1	1	1	0	1	7	more than once/day	more than once/day	more than once/day	4-5 /weekly	more than once/day	once /day
2:46:36 ص 2022/11/28	23-27 years old	5	1	4	4,000 – less than 8,000 SR per month	3	1	3 years	11	90	13.5802	Underweight range	No	No	Yes	Universities \ schools	1	1	1	0	0	1	0	1	5	0	0	0	0	0	1	0	1	2	0	1	1	1	1	1	1	1	7	4-5 /weekly	4-5 /weekly	4-5 /weekly	once or < monthly	once /day	4-5 /weekly
5:43:59 ص 2022/11/28	23-27 years old	2	1	3	4,000 – less than 8,000 SR per month	1	1	4 years	15	100	15	Underweight range	No	No	No		0	0	0	0	0	0	0	1	1	1	1	1	1	0	1	0	1	6	1	1	1	1	0	1	0	0	5	once /day	2-3 weekly	2-3 weekly	2-3 weekly	once /day	once or < monthly
8:40:18 ص 2022/11/28	37-41 years old	2	1	2	Under 4,000 SR per month	12	1	4 years	13	90	16.0494	Underweight range	I don't no	No	Yes	Social media \ Internet	1	1	1	0	0	0	1	1	5	1	0	1	1	0	0	1	0	4	1	1	1	0	1	1	0	1	6	4-5 /weekly	4-5 /weekly	2-3 weekly	once or < monthly	Never	once or < monthly
9:45:50 ص 2022/11/28	28-31 years old	4	1	2	4,000 – less than 8,000 SR per month	1	1	5 years	15	I don't no	Missing data	Missing data	Yes	No	Yes	Universities \ schools	1	1	1	1	1	1	1	1	8	0	1	1	0	0	1	0	1	4	1	1	1	1	1	1	0	1	7	once /day	once weekly	once /day	once /day	more than once/day	Never
12:20:59 م 2022/11/28	18-22 years old	4	1	3	8,000 –less than 15,000 SR per month	1	1	3 years	18	57	55.4017	Obesity range	No	No	Yes	Social media \ Internet	1	1	1	1	1	1	0	1	7	1	0	1	0	1	0	0	1	4	1	1	1	1	1	1	0	1	7	2-3 weekly	2-3 weekly	once weekly	4-5 /weekly	4-5 /weekly	once weekly
12:55:10 م 2022/11/28	32-36 years old	4	1	2	8,000 –less than 15,000 SR per month	3	2	5 years	19	115	14.3667	Underweight range	No	Yes	Yes	Ministry of Health \ Food and Drug Administration	1	1	1	0	0	1	1	1	6	0	0	0	0	0	0	0	1	1	1	1	0	0	0	1	1	1	5	more than once/day	more than once/day	more than once/day	once or < monthly	once /day	4-5 /weekly
5:47:31 م 2022/11/28	28-31 years old	2	1	3	8,000 –less than 15,000 SR per month	3	1	5 years	13	105	11.7914	Underweight range	Yes	Yes	Yes	Family and friends	1	1	1	1	1	1	1	1	8	0	0	1	1	0	0	1	1	4	1	1	1	1	1	1	1	1	8	once weekly	once or < monthly	once weekly	Never	Never	once or < monthly
7:36:08 م 2022/11/28	18-22 years old	1	1	3	4,000 – less than 8,000 SR per month	3	1	3 years	9	34	Missing data	Missing data	No	No	Yes	Ministry of Health \ Food and Drug Administration	1	1	0	1	0	0	1	0	4	0	0	0	0	1	1	1	1	4	1	0	0	0	1	1	0	1	4	once /day	more than once/day	once /day	more than once/day	more than once/day	once /day
9:09:18 م 2022/11/28	28-31 years old	2	1	3	8,000 –less than 15,000 SR per month	1	2	4 years	11	46	51.9849	Obesity range	No	No	Yes	Social media \ Internet	1	1	0	1	1	1	1	1	7	1	0	1	1	1	0	1	1	6	1	1	1	1	1	1	0	1	7	once or < monthly	once weekly	Never	2-3 weekly	2-3 weekly	Never
11:31:45 م 2022/11/28	32-36 years old	2	1	3	4,000 – less than 8,000 SR per month	1	2	4 years	12	35	Missing data	Missing data	No	No	Yes	Ministry of Health \ Food and Drug Administration	1	1	1	1	1	0	1	1	7	1	1	1	1	1	1	1	1	8	1	1	1	1	1	1	1	1	8	4-5 /weekly	4-5 /weekly	once /day	4-5 /weekly	once /day	4-5 /weekly
5:31:05 م 2022/11/29	37-41 years old	5	1	2	4,000 – less than 8,000 SR per month	1	2	5 years	19	100	19	Healthy weight range	Yes	No	No		0	0	0	0	0	0	0	0	0	1	0	1	0	0	1	0	1	4	1	1	1	1	1	1	1	1	8	2-3 weekly	once weekly	4-5 /weekly	Never	2-3 weekly	Never
2:24:03 ص 2022/12/12	32-36 years old	1	1	3	8,000 –less than 15,000 SR per month	6	2	3 years	10	57	30.7787	Obesity range	No	No	No		1	1	1	1	0	0	1	1	6	0	0	1	0	1	1	1	1	5	1	1	1	1	1	1	1	1	8	once /day	2-3 weekly	once /day	2-3 weekly	once /day	2-3 weekly
3:10:24 ص 2022/12/12	23-27 years old	4	1	4	8,000 –less than 15,000 SR per month	3	1	3 years	13	85	17.9931	Underweight range	No	No	No		0	0	1	1	0	0	1	1	4	1	0	1	0	0	1	0	1	4	0	1	1	0	0	1	0	1	4	once /day	once weekly	once /day	Never	once /day	Never
5:01:48 م 2022/12/12	37-41 years old	4	1	3	4,000 – less than 8,000 SR per month	1	3	3 years	16	101	15.6847	Underweight range	No	No	No		1	1	1	0	1	1	1	0	6	0	0	1	0	0	0	0	1	2	1	0	0	0	1	1	0	1	4	once /day	4-5 /weekly	once /day	once or < monthly	more than once/day	2-3 weekly
5:06:33 م 2022/12/12	42-46 years old	5	1	2	Above 25,000 SR per month	1	1	5 years	20	90	24.6914	Healthy weight range	I don't no	No	No		0	0	0	0	0	0	0	0	0	0	0	1	1	1	1	1	1	6	1	1	1	1	1	1	0	1	7	once /day	2-3 weekly	2-3 weekly	once /day	once /day	Never
7:00:58 م 2022/12/12	37-41 years old	4	1	2	15,000 – less than 25,000 SR per month	1	1	3 years	27	133	15.2637	Underweight range	Yes	Yes	Yes	Universities \ schools	1	1	1	1	1	0	1	0	6	1	0	0	0	1	1	0	0	3	1	1	0	0	1	1	0	1	5	once or < monthly	once /day	4-5 /weekly	once or < monthly	once or < monthly	once weekly
9:06:43 م 2022/12/12	32-36 years old	4	1	1	8,000 –less than 15,000 SR per month	4	2	5 years	17	105	15.4195	Underweight range	I don't no	No	Yes	Ministry of Health \ Food and Drug Administration	1	1	0	1	0	0	1	1	5	0	0	1	1	1	1	0	1	5	1	1	1	1	1	1	1	1	8	once /day	once weekly	once /day	once or < monthly	more than once/day	Never
9:03:53 ص 2022/12/13	32-36 years old	4	1	3	4,000 – less than 8,000 SR per month	1	1	3 years	14	0	Missing data	Missing data	Yes	No	Yes	Social media \ Internet	1	1	0	1	0	0	1	1	5	0	0	0	1	1	1	1	1	5	1	1	1	1	1	1	1	0	7	once /day	once weekly	once or < monthly	once or < monthly	once weekly	Never
5:48:05 م 2022/12/13	Above 46 years old	5	1	2	Above 25,000 SR per month	1	1	4 years	20	115	15.1229	Underweight range	No	No	Yes	Conferences and symposia	1	1	1	0	0	0	1	1	5	1	1	1	0	1	1	0	1	6	1	1	1	0	1	1	0	1	6	4-5 /weekly	2-3 weekly	2-3 weekly	4-5 /weekly	once weekly	Never
10:20:54 م 2022/12/13	32-36 years old	4	1	3	8,000 –less than 15,000 SR per month	1	2	4 years	14.5	98	15.0979	Underweight range	No	Yes	Yes	Social media \ Internet	1	1	0	1	0	0	0	0	3	0	0	1	0	1	1	0	1	4	1	1	0	0	1	1	0	1	5	once /day	once /day	once /day	once weekly	more than once/day	once weekly
5:33:12 ص 2022/12/14	42-46 years old	4	1	2	4,000 – less than 8,000 SR per month	1	1	4 years	19	110	15.7025	Underweight range	No	No	No		1	1	1	1	1	1	1	1	8	1	0	1	0	1	0	1	1	5	0	1	1	0	1	1	1	1	6	once weekly	once weekly	once weekly	once weekly	once weekly	once weekly
7:36:01 ص 2022/12/14	28-31 years old	2	1	3	8,000 –less than 15,000 SR per month	1	1	4 years	12	I don't no	Missing data	Missing data	No	Yes	Yes	Social media \ Internet	1	1	0	0	0	0	1	1	4	1	0	0	0	1	0	0	1	3	1	1	1	1	1	1	1	0	7	once /day	once weekly	once weekly	more than once/day	more than once/day	once weekly
7:46:07 ص 2022/12/14	37-41 years old	2	1	3	4,000 – less than 8,000 SR per month	1	1	5 years	16	125	10.24	Underweight range	No	No	Yes	Ministry of Health \ Food and Drug Administration	1	1	1	1	1	0	1	1	7	0	1	1	0	1	0	1	1	5	1	1	1	1	1	1	1	1	8	once /day	4-5 /weekly	4-5 /weekly	once /day	more than once/day	4-5 /weekly
7:49:53 ص 2022/12/14	42-46 years old	2	1	3	8,000 –less than 15,000 SR per month	1	1	5 years	17	112	13.5523	Underweight range	No	No	No		0	0	0	0	0	0	0	0	0	0	0	1	0	0	0	0	0	1	1	1	1	1	1	1	0	0	6	once /day	once /day	once /day	once /day	once /day	once /day
8:13:16 ص 2022/12/14	32-36 years old	4	1	3	8,000 –less than 15,000 SR per month	1	2	5 years	18	100	18	Underweight range	No	No	Yes	Universities \ schools	1	1	1	1	1	1	1	1	8	0	1	1	0	1	1	1	1	6	1	1	1	1	1	1	0	0	6	once weekly	once weekly	4-5 /weekly	once weekly	once or < monthly	2-3 weekly
10:44:58 ص 2022/12/14	42-46 years old	1	1	3	8,000 –less than 15,000 SR per month	1	more than 3	5 years	30	100	30	Overweight range	I don't no	Yes	No		0	1	0	0	1	0	0	1	3	0	1	1	1	1	1	0	1	6	1	0	1	0	1	1	0	1	5	4-5 /weekly	4-5 /weekly	4-5 /weekly	4-5 /weekly	once /day	4-5 /weekly
11:33:36 ص 2022/12/14	23-27 years old	3	1	3	4,000 – less than 8,000 SR per month	1	1	3 years	14	100	14	Underweight range	No	No	No		0	0	1	0	0	0	1	1	3	1	0	0	0	1	1	1	1	5	1	1	1	1	1	1	1	1	8	2-3 weekly	Never	once weekly	Never	once weekly	once weekly
12:39:38 م 2022/12/14	28-31 years old	4	1	3	15,000 – less than 25,000 SR per month	1	1	3 years	14	92	16.5406	Underweight range	No	No	Yes	Universities \ schools	1	0	0	0	0	0	1	1	3	0	1	0	0	0	0	1	1	3	1	1	1	1	1	1	1	1	8	once weekly	2-3 weekly	2-3 weekly	Never	2-3 weekly	Never
5:42:58 م 2022/12/14	28-31 years old	4	1	2	15,000 – less than 25,000 SR per month	1	1	4 years	18	I don't no	Missing data	Missing data	No	Yes	No		0	1	0	0	0	0	0	1	2	0	0	0	1	1	1	1	1	5	1	1	1	1	1	0	0	1	6	once /day	2-3 weekly	more than once/day	more than once/day	more than once/day	4-5 /weekly
6:11:03 م 2022/12/14	37-41 years old	5	1	1	Above 25,000 SR per month	1	1	5 years	16.5	106	14.6849	Underweight range	Yes	No	Yes	Universities \ schools	1	1	1	1	1	1	1	1	8	1	1	0	1	0	1	1	1	6	1	1	1	1	1	1	0	1	7	once weekly	Never	2-3 weekly	once or < monthly	once weekly	Never
8:10:44 م 2022/12/14	28-31 years old	4	1	3	4,000 – less than 8,000 SR per month	1	2	3 years	14	110	11.5702	Underweight range	No	No	Yes	Social media \ Internet	1	1	1	1	1	1	1	1	8	1	1	0	0	1	1	1	1	6	1	1	1	1	1	1	1	1	8	once or < monthly	once or < monthly	once or < monthly	once weekly	once weekly	Never
9:06:47 م 2022/12/14	37-41 years old	4	1	2	8,000 –less than 15,000 SR per month	1	2	5 years	10	54	34.2936	Obesity range	I don't no	Yes	No		1	0	0	0	1	1	1	1	5	0	0	1	0	1	1	1	1	5	1	1	1	1	1	1	0	1	7	more than once/day	4-5 /weekly	4-5 /weekly	more than once/day	more than once/day	2-3 weekly
10:43:14 م 2022/12/14	32-36 years old	4	1	3	8,000 –less than 15,000 SR per month	1	1	3 years	8	73	15.0122	Underweight range	Yes	No	Yes	Social media \ Internet	1	0	1	1	1	1	0	1	6	1	0	1	0	0	0	0	1	3	0	0	1	0	1	1	0	0	3	once /day	4-5 /weekly	2-3 weekly	more than once/day	more than once/day	2-3 weekly
11:18:28 م 2022/12/14	28-31 years old	4	1	3	8,000 –less than 15,000 SR per month	1	2	5 years	16	120	11.1111	Underweight range	No	No	Yes	Social media \ Internet	1	1	0	1	1	1	1	1	7	0	0	0	0	0	0	0	1	1	1	1	1	1	1	1	0	1	7	2-3 weekly	once weekly	once weekly	once or < monthly	once or < monthly	once or < monthly
1:31:22 ص 2022/12/15	32-36 years old	4	1	3	8,000 –less than 15,000 SR per month	3	1	3 years	11	100	11	Underweight range	No	No	No		0	0	0	0	0	0	0	0	0	1	0	1	0	0	0	0	1	3	1	1	1	1	1	1	0	1	7	once /day	more than once/day	once /day	once /day	more than once/day	4-5 /weekly
6:25:48 ص 2022/12/15	32-36 years old	2	1	3	8,000 –less than 15,000 SR per month	1	1	5 years	19	120	13.1944	Underweight range	No	No	Yes	Social media \ Internet	1	1	0	1	0	1	1	1	6	0	0	0	0	0	0	0	1	1	1	1	1	1	1	1	0	1	7	4-5 /weekly	2-3 weekly	4-5 /weekly	2-3 weekly	once /day	Never
6:42:58 ص 2022/12/15	Above 46 years old	4	3	3	Under 4,000 SR per month	3	more than 3	5 years	30	100	30	Overweight range	No	No	No		0	0	0	0	0	0	0	1	1	0	0	1	1	1	1	1	1	6	0	0	1	1	0	1	1	1	5	more than once/day	once /day	more than once/day	more than once/day	once /day	once /day
7:15:32 ص 2022/12/15	32-36 years old	4	1	3	4,000 – less than 8,000 SR per month	1	1	4 years	15.5	100	15.5	Underweight range	Yes	No	No		0	0	0	0	0	0	0	0	0	1	0	1	0	1	1	0	1	5	1	1	1	1	1	1	1	1	8	once /day	Never	once /day	once or < monthly	Never	Never
8:43:25 ص 2022/12/15	32-36 years old	4	1	3	8,000 –less than 15,000 SR per month	2	2	5 years	20	120	13.8889	Underweight range	No	No	Yes	Family and friends	1	1	1	1	1	1	1	1	8	0	0	1	0	0	0	0	1	2	0	1	1	0	1	1	1	1	6	once /day	once weekly	once weekly	once weekly	2-3 weekly	once weekly
9:14:09 م 2022/12/15	32-36 years old	4	1	3	8,000 –less than 15,000 SR per month	1	1	3 years	12	85	16.609	Underweight range	No	No	Yes	Social media \ Internet	1	0	0	0	0	0	0	0	1	0	0	1	0	1	1	0	1	4	1	1	1	1	1	1	1	1	8	once weekly	once weekly	2-3 weekly	once /day	once /day	once weekly
12:26:10 ص 2022/12/16	32-36 years old	5	1	2	8,000 –less than 15,000 SR per month	1	1	4 years	20	120	13.8889	Underweight range	I don't no	No	Yes	Universities \ schools	1	1	1	1	1	1	0	1	7	0	0	1	1	1	1	0	1	5	1	1	1	1	1	1	0	0	6	more than once/day	more than once/day	more than once/day	once /day	once /day	Never
1:56:39 م 2022/12/16	32-36 years old	4	1	3	8,000 –less than 15,000 SR per month	3	2	5 years	16	115	12.0983	Underweight range	No	No	No		0	0	0	1	1	1	0	0	3	1	0	1	1	1	0	1	1	6	1	1	1	1	1	1	0	0	6	once weekly	once weekly	once weekly	2-3 weekly	2-3 weekly	once weekly
5:50:12 م 2022/12/18	28-31 years old	3	1	3	8,000 –less than 15,000 SR per month	1	1	5 years	18	100	18	Underweight range	No	No	Yes	Social media \ Internet	1	1	0	0	0	0	0	0	2	1	0	1	0	0	1	1	1	5	1	1	0	1	1	1	0	0	5	once /day	2-3 weekly	2-3 weekly	2-3 weekly	once /day	2-3 weekly
6:03:29 م 2022/12/18	23-27 years old	4	1	3	4,000 – less than 8,000 SR per month	1	1	4 years	24	No	Missing data	Missing data	No	No	No		1	1	0	1	0	0	0	1	4	1	1	1	0	0	0	1	1	5	0	0	0	0	0	1	0	1	2	4-5 /weekly	once /day	4-5 /weekly	4-5 /weekly	4-5 /weekly	4-5 /weekly
7:39:30 م 2022/12/18	28-31 years old	4	1	3	8,000 –less than 15,000 SR per month	1	1	3 years	16	90	19.7531	Healthy weight range	No	No	Yes	Social media \ Internet	1	1	1	1	1	1	1	1	8	1	0	1	0	1	1	0	1	5	1	1	1	1	1	1	0	1	7	once /day	4-5 /weekly	once /day	4-5 /weekly	once weekly	once weekly
10:13:19 م 2022/12/18	Above 46 years old	4	1	2	Above 25,000 SR per month	1	1	4 years	15	130	8.87574	Underweight range	Yes	No	Yes	Ministry of Health \ Food and Drug Administration	1	1	1	1	0	0	1	1	6	1	0	1	0	1	1	1	1	6	1	1	1	1	1	1	1	1	8	once weekly	once weekly	once weekly	once weekly	once weekly	once or < monthly
3:30:53 م 2022/12/19	32-36 years old	4	1	2	8,000 –less than 15,000 SR per month	1	1	5 years	16	80	25	Healthy weight range	No	No	Yes	Universities \ schools	1	1	1	1	0	1	1	1	7	1	0	1	1	0	1	1	1	6	1	1	1	1	1	1	0	1	7	once /day	once /day	once /day	4-5 /weekly	once /day	once /day
7:44:46 م 2022/12/19	32-36 years old	2	1	3	8,000 –less than 15,000 SR per month	1	1	5 years	21	100	21	Healthy weight range	No	No	Yes	Social media \ Internet	1	0	1	1	1	0	1	0	5	1	0	0	1	0	1	1	1	5	1	1	1	0	1	1	0	1	6	4-5 /weekly	2-3 weekly	2-3 weekly	once weekly	once or < monthly	Never
8:02:10 م 2022/12/19	23-27 years old	2	1	3	4,000 – less than 8,000 SR per month	1	2	4 years	15	90	18.5185	Healthy weight range	I don't no	No	Yes	Social media \ Internet	0	1	1	1	1	1	1	1	7	0	1	1	1	1	1	1	1	7	1	1	1	1	1	1	0	1	7	more than once/day	once /day	once /day	4-5 /weekly	once /day	once /day
8:03:37 م 2022/12/19	23-27 years old	3	1	4	4,000 – less than 8,000 SR per month	1	1	4 years	20	100	20	Healthy weight range	No	No	Yes	Ministry of Health \ Food and Drug Administration	0	1	1	1	1	1	1	0	6	0	1	0	0	0	0	0	0	1	1	1	1	0	1	0	0	1	5	once /day	more than once/day	4-5 /weekly	once /day	once /day	more than once/day
8:11:26 م 2022/12/19	42-46 years old	4	1	2	15,000 – less than 25,000 SR per month	1	1	4 years	20	105	18.1406	Underweight range	No	No	No		0	0	0	0	0	1	0	0	1	1	1	1	1	1	0	1	1	7	1	1	1	1	1	1	0	1	7	once /day	once /day	once /day	once /day	once /day	once /day
8:16:10 م 2022/12/19	18-22 years old	2	1	4	4,000 – less than 8,000 SR per month	1	1	4 years	13	89	16.4121	Underweight range	No	No	No		1	0	0	0	0	0	1	1	3	1	0	1	0	1	1	1	1	6	1	1	1	1	1	1	0	0	6	2-3 weekly	once or < monthly	once or < monthly	once weekly	once /day	once or < monthly
8:18:23 م 2022/12/19	23-27 years old	4	1	2	8,000 –less than 15,000 SR per month	1	1	3 years	12	77	20.2395	Healthy weight range	Yes	No	Yes	Social media \ Internet	1	1	1	0	0	0	1	1	5	0	0	1	1	0	0	0	1	3	1	1	0	0	0	0	0	1	3	once /day	4-5 /weekly	2-3 weekly	4-5 /weekly	more than once/day	more than once/day
8:18:37 م 2022/12/19	Above 46 years old	4	1	3	4,000 – less than 8,000 SR per month	1	2	5 years	23	115	17.3913	Underweight range	No	Yes	No		0	0	0	0	0	0	0	0	0	1	0	0	0	0	0	0	1	2	1	1	1	1	1	1	1	1	8	once weekly	once or < monthly	once or < monthly	2-3 weekly	4-5 /weekly	once or < monthly
8:23:17 م 2022/12/19	23-27 years old	4	1	4	8,000 –less than 15,000 SR per month	1	1	4 years	17	110	14.0496	Underweight range	No	No	Yes	Social media \ Internet	1	1	1	0	0	0	1	1	5	0	0	0	0	1	0	1	1	3	1	1	1	1	1	1	0	1	7	once /day	once weekly	2-3 weekly	once weekly	once /day	2-3 weekly
8:24:51 م 2022/12/19	23-27 years old	4	1	4	4,000 – less than 8,000 SR per month	1	1	5 years	19	109	15.9919	Underweight range	I don't no	Yes	Yes	Ministry of Health \ Food and Drug Administration	1	0	0	1	0	0	1	1	4	1	0	1	0	0	1	0	1	4	1	1	1	1	1	1	1	1	8	2-3 weekly	once weekly	2-3 weekly	2-3 weekly	4-5 /weekly	once weekly
8:27:55 م 2022/12/19	37-41 years old	2	1	3	15,000 – less than 25,000 SR per month	1	more than 3	5 years	30	100	30	Overweight range	No	No	Yes	Social media \ Internet	1	1	1	1	1	0	0	1	6	0	0	1	0	0	0	0	1	2	1	1	1	1	1	1	0	0	6	once /day	4-5 /weekly	2-3 weekly	once /day	once /day	more than once/day
8:30:22 م 2022/12/19	28-31 years old	4	1	3	8,000 –less than 15,000 SR per month	1	1	4 years	18	93	20.8117	Healthy weight range	No	Yes	Yes	Family and friends	1	1	0	1	1	0	0	1	5	1	0	1	0	0	0	1	1	4	1	1	1	1	1	1	1	1	8	2-3 weekly	2-3 weekly	once /day	more than once/day	more than once/day	Never
8:33:17 م 2022/12/19	32-36 years old	4	1	2	15,000 – less than 25,000 SR per month	1	1	4 years	21	102	20.1845	Healthy weight range	Yes	Yes	Yes	Universities \ schools	1	1	1	1	1	1	1	1	8	1	0	0	0	1	1	1	1	5	1	1	1	1	1	1	1	1	8	once /day	once weekly	once weekly	4-5 /weekly	4-5 /weekly	once /day
8:34:19 م 2022/12/19	28-31 years old	4	1	3	8,000 –less than 15,000 SR per month	1	2	3 years	13	100	13	Underweight range	No	Yes	No		0	0	0	0	0	0	1	1	2	0	0	0	1	0	0	1	1	3	1	1	1	1	1	1	1	1	8	once /day	once /day	once /day	once weekly	once /day	once weekly
8:39:41 م 2022/12/19	23-27 years old	4	1	2	4,000 – less than 8,000 SR per month	1	3	3 years	14	85	19.3772	Healthy weight range	No	No	Yes	TV/radio	0	0	0	1	0	0	1	1	3	0	0	1	1	0	0	0	1	3	1	1	1	1	1	1	0	0	6	once /day	once /day	once /day	Never	2-3 weekly	once /day
8:42:00 م 2022/12/19	28-31 years old	4	1	3	4,000 – less than 8,000 SR per month	1	2	5 years	13	51	49.9808	Obesity range	No	Yes	Yes	Social media \ Internet	1	1	0	1	1	1	0	1	6	0	1	0	0	1	0	1	1	4	1	1	1	1	1	1	1	1	8	4-5 /weekly	4-5 /weekly	4-5 /weekly	2-3 weekly	4-5 /weekly	once weekly
8:44:10 م 2022/12/19	28-31 years old	5	1	1	15,000 – less than 25,000 SR per month	1	2	4 years	18	78	29.5858	Overweight range	No	No	Yes	Social media \ Internet	0	1	0	1	1	0	1	0	4	1	1	1	0	1	1	0	1	6	1	1	1	1	1	1	0	1	7	once /day	2-3 weekly	2-3 weekly	2-3 weekly	2-3 weekly	2-3 weekly
8:47:24 م 2022/12/19	23-27 years old	4	1	3	4,000 – less than 8,000 SR per month	1	1	5 years	20	30	Missing data	Missing data	I don't no	No	No		1	1	0	0	0	0	1	0	3	1	0	1	0	0	0	1	1	4	1	1	1	1	1	1	1	1	8	more than once/day	once /day	once /day	once /day	once /day	once /day
9:03:24 م 2022/12/19	18-22 years old	4	1	4	8,000 –less than 15,000 SR per month	1	2	4 years	14	107	12.2281	Underweight range	No	No	Yes	Social media \ Internet	1	1	0	1	0	0	1	0	4	0	0	0	1	0	0	0	0	1	1	1	1	1	1	0	0	0	5	once /day	once /day	once /day	more than once/day	more than once/day	once /day
9:03:58 م 2022/12/19	37-41 years old	4	1	2	Under 4,000 SR per month	1	1	5 years	25	125	16	Underweight range	Yes	Yes	No		1	1	1	1	1	0	1	1	7	0	0	0	0	1	1	0	1	3	0	1	1	1	1	1	0	1	6	2-3 weekly	2-3 weekly	4-5 /weekly	2-3 weekly	2-3 weekly	Never
9:08:31 م 2022/12/19	32-36 years old	4	1	3	4,000 – less than 8,000 SR per month	13	1	3 years	10	100	10	Underweight range	I don't no	Yes	No		0	0	0	1	0	0	0	0	1	1	0	0	0	0	0	0	0	1	0	0	1	1	1	1	1	1	6	once /day	once /day	once /day	once /day	once /day	2-3 weekly
9:14:12 م 2022/12/19	28-31 years old	4	1	3	15,000 – less than 25,000 SR per month	1	1	3 years	15	I don't no	Missing data	Missing data	No	No	Yes	Social media \ Internet	1	1	1	1	0	0	0	1	5	0	0	1	1	0	0	0	1	3	0	1	1	1	1	1	0	1	6	once /day	2-3 weekly	2-3 weekly	once /day	4-5 /weekly	once weekly
9:14:19 م 2022/12/19	18-22 years old	4	1	4	8,000 –less than 15,000 SR per month	1	1	4 years	14	107	12.2281	Underweight range	No	No	Yes	Ministry of Health \ Food and Drug Administration	1	1	0	1	0	0	1	0	4	0	1	1	1	0	0	0	0	3	1	1	1	1	1	1	0	0	6	once /day	once /day	once /day	more than once/day	once /day	once /day
9:17:15 م 2022/12/19	18-22 years old	4	1	2	Above 25,000 SR per month	1	2	3 years	35	125	22.4	Healthy weight range	I don't no	Yes	No		0	1	1	0	0	0	1	1	4	0	1	0	0	0	0	0	1	2	1	0	0	1	1	1	0	1	5	4-5 /weekly	2-3 weekly	once /day	2-3 weekly	once /day	2-3 weekly
9:22:16 م 2022/12/19	23-27 years old	4	1	2	Above 25,000 SR per month	1	1	4 years	20	100	20	Healthy weight range	Yes	No	Yes	Ministry of Health \ Food and Drug Administration	0	1	1	1	1	1	1	1	7	1	1	0	0	1	1	1	1	6	1	1	1	1	1	1	1	0	7	once weekly	once weekly	once weekly	2-3 weekly	2-3 weekly	Never
9:25:29 م 2022/12/19	18-22 years old	4	1	2	4,000 – less than 8,000 SR per month	1	2	4 years	25	120	17.3611	Underweight range	No	No	No		0	1	1	0	0	0	0	1	3	1	0	1	0	1	0	0	0	3	0	1	1	1	1	0	1	1	6	once or < monthly	once or < monthly	once weekly	2-3 weekly	4-5 /weekly	once weekly
9:26:39 م 2022/12/19	18-22 years old	2	1	2	Under 4,000 SR per month	1	2	4 years	17	100	17	Underweight range	Yes	Yes	Yes	Social media \ Internet	1	1	1	0	0	0	1	1	5	0	0	1	1	1	1	1	1	6	1	1	1	1	0	1	0	1	6	4-5 /weekly	4-5 /weekly	once /day	once /day	more than once/day	2-3 weekly
9:27:56 م 2022/12/19	18-22 years old	2	1	3	4,000 – less than 8,000 SR per month	1	2	4 years	18	90	22.2222	Healthy weight range	No	No	Yes	Social media \ Internet	1	1	0	1	0	0	1	1	5	0	0	1	0	1	1	0	1	4	1	1	1	0	0	1	0	0	4	2-3 weekly	once weekly	once weekly	2-3 weekly	4-5 /weekly	Never
9:32:02 م 2022/12/19	28-31 years old	4	1	1	8,000 –less than 15,000 SR per month	1	1	3 years	14	90	17.284	Underweight range	No	No	Yes	Social media \ Internet	1	1	0	1	1	1	1	1	7	1	0	1	0	0	0	1	1	4	1	1	1	1	1	1	1	1	8	once or < monthly	once or < monthly	once weekly	once or < monthly	Never	Never
9:42:42 م 2022/12/19	18-22 years old	2	1	3	8,000 –less than 15,000 SR per month	1	1	3 years	9	80	14.0625	Underweight range	No	No	No		0	1	0	1	1	1	0	0	4	1	0	0	0	1	0	0	0	2	1	1	1	1	1	1	0	0	6	more than once/day	once /day	more than once/day	once /day	more than once/day	more than once/day
9:46:44 م 2022/12/19	23-27 years old	4	1	2	4,000 – less than 8,000 SR per month	1	2	5 years	10	100	10	Underweight range	No	No	Yes	Social media \ Internet	0	1	0	0	0	0	0	0	1	0	0	1	0	0	1	0	1	3	1	1	1	1	1	1	0	1	7	once weekly	once weekly	once weekly	once weekly	once weekly	once weekly
9:52:35 م 2022/12/19	32-36 years old	3	1	3	Above 25,000 SR per month	1	1	5 years	20	120	13.8889	Underweight range	No	No	No		1	1	1	1	0	0	1	0	5	0	0	1	0	0	0	0	0	1	0	1	1	0	1	1	0	0	4	once /day	2-3 weekly	once /day	once /day	once /day	2-3 weekly
10:00:45 م 2022/12/19	42-46 years old	4	1	2	8,000 –less than 15,000 SR per month	1	1	4 years	26	80	40.625	Obesity range	No	Yes	No		0	0	0	0	0	0	0	1	1	1	0	1	0	0	0	0	1	3	1	1	1	1	1	0	0	1	6	once weekly	once weekly	2-3 weekly	once /day	once /day	4-5 /weekly
10:08:10 م 2022/12/19	28-31 years old	4	1	3	Above 25,000 SR per month	1	2	5 years	17	110	14.0496	Underweight range	No	No	Yes	Social media \ Internet	1	1	0	0	0	0	0	0	2	0	0	0	0	0	0	0	1	1	0	1	1	0	1	1	0	1	5	4-5 /weekly	4-5 /weekly	once /day	4-5 /weekly	once or < monthly	Never
10:37:11 م 2022/12/19	23-27 years old	2	1	3	8,000 –less than 15,000 SR per month	1	1	5 years	20	110	16.5289	Underweight range	No	No	Yes	Social media \ Internet	1	1	1	1	1	1	1	1	8	0	0	1	1	0	0	0	1	3	0	1	1	0	1	1	0	0	4	once /day	4-5 /weekly	2-3 weekly	once /day	once /day	2-3 weekly
10:44:54 م 2022/12/19	23-27 years old	4	1	4	15,000 – less than 25,000 SR per month	1	1	3 years	13	I don't no	Missing data	Missing data	No	No	Yes	Social media \ Internet	1	1	1	0	0	0	1	1	5	1	0	0	0	0	1	1	1	4	1	1	1	1	1	1	1	1	8	once weekly	4-5 /weekly	once weekly	once /day	once /day	Never
11:03:41 م 2022/12/19	42-46 years old	2	1	3	4,000 – less than 8,000 SR per month	1	1	4 years	20	120	13.8889	Underweight range	I don't no	I don't no	No		0	0	1	0	0	1	0	0	2	0	0	0	0	1	0	0	0	1	1	0	1	1	1	1	1	1	7	more than once/day	more than once/day	more than once/day	more than once/day	more than once/day	more than once/day
11:10:32 م 2022/12/19	37-41 years old	3	2	2	15,000 – less than 25,000 SR per month	4	2	4 years	لهل	ظلع	Missing data	Missing data	Yes	I don't no	No		0	0	0	0	1	0	0	1	2	0	0	1	0	0	1	0	0	2	1	1	1	1	0	1	0	0	5	once /day	once /day	once /day	once /day	once /day	more than once/day
11:42:04 م 2022/12/19	Above 46 years old	2	1	4	4,000 – less than 8,000 SR per month	1	more than 3	5 years	22	44	113.636	Obesity range	Yes	No	Yes	Newspapers and magazines	0	1	0	1	0	0	1	1	4	0	1	0	0	0	0	0	0	1	1	1	0	0	0	0	0	0	2	more than once/day	more than once/day	more than once/day	more than once/day	more than once/day	more than once/day
11:44:53 م 2022/12/19	42-46 years old	2	1	3	4,000 – less than 8,000 SR per month	1	1	4 years	20	100	20	Healthy weight range	No	No	Yes	Ministry of Health \ Food and Drug Administration	1	1	1	1	1	0	1	1	7	0	1	1	1	1	1	1	1	7	1	1	1	1	1	1	0	0	6	once /day	4-5 /weekly	2-3 weekly	once /day	more than once/day	4-5 /weekly
11:55:19 م 2022/12/19	23-27 years old	4	1	2	4,000 – less than 8,000 SR per month	1	1	4 years	12	96	13.0208	Underweight range	No	No	No		0	1	1	1	1	1	1	1	7	1	1	1	1	1	0	0	1	6	1	1	1	1	1	1	1	1	8	4-5 /weekly	once /day	once /day	more than once/day	more than once/day	2-3 weekly
12:01:21 ص 2022/12/20	28-31 years old	4	1	3	15,000 – less than 25,000 SR per month	1	1	3 years	13	83	18.8707	Healthy weight range	No	No	Yes	Social media \ Internet	1	1	0	1	0	0	0	1	4	1	1	0	0	1	0	1	1	5	1	1	1	1	1	1	1	1	8	once /day	2-3 weekly	once /day	4-5 /weekly	2-3 weekly	2-3 weekly
12:07:21 ص 2022/12/20	28-31 years old	4	1	3	4,000 – less than 8,000 SR per month	1	1	3 years	25	I don't no	Missing data	Missing data	Yes	No	No		0	0	0	0	0	0	0	0	0	0	1	0	0	0	0	0	1	2	1	0	1	1	1	0	0	1	5	once /day	once /day	once /day	once /day	once /day	once /day
12:37:25 ص 2022/12/20	37-41 years old	2	1	3	8,000 –less than 15,000 SR per month	1	1	3 years	15	95	16.6205	Underweight range	No	No	Yes	Social media \ Internet	1	1	1	1	1	0	1	1	7	1	0	1	1	1	0	0	1	5	1	1	1	1	1	1	1	1	8	4-5 /weekly	2-3 weekly	once weekly	once /day	once /day	Never
4:11:50 ص 2022/12/20	28-31 years old	4	1	2	8,000 –less than 15,000 SR per month	1	1	3 years	18	70	36.7347	Obesity range	No	No	Yes	Social media \ Internet	0	0	0	1	1	1	0	1	4	1	0	0	1	1	1	0	1	5	1	1	1	1	1	1	0	1	7	once /day	Never	2-3 weekly	Never	once or < monthly	Never
5:49:41 ص 2022/12/20	18-22 years old	2	1	3	4,000 – less than 8,000 SR per month	1	1	3 years	17	79	27.2392	Overweight range	No	No	Yes	Social media \ Internet	1	0	0	0	0	0	0	0	1	1	0	1	1	1	1	0	1	6	1	1	1	1	1	1	1	1	8	once or < monthly	once or < monthly	once weekly	once weekly	once weekly	Never
6:10:54 ص 2022/12/20	28-31 years old	4	1	2	8,000 –less than 15,000 SR per month	1	1	3 years	19	70	38.7755	Obesity range	No	No	Yes	Social media \ Internet	1	1	0	1	0	0	1	0	4	1	0	1	1	0	1	0	1	5	1	1	1	1	1	1	0	1	7	once weekly	Never	more than once/day	Never	Never	2-3 weekly
7:28:39 ص 2022/12/20	32-36 years old	4	1	3	4,000 – less than 8,000 SR per month	1	1	3 years	13	80	20.3125	Healthy weight range	No	No	No		1	1	0	1	0	0	0	1	4	0	0	0	0	0	0	0	1	1	1	1	1	1	1	1	1	0	7	2-3 weekly	2-3 weekly	once /day	once weekly	once or < monthly	once or < monthly
7:39:44 ص 2022/12/20	18-22 years old	4	1	4	8,000 –less than 15,000 SR per month	1	1	3 years	15	60	41.6667	Obesity range	No	Yes	Yes	Family and friends	1	0	1	1	1	1	1	1	7	0	0	1	1	1	1	1	1	6	1	1	1	1	1	1	0	0	6	once /day	once /day	once /day	once /day	once /day	Never
7:53:40 ص 2022/12/20	32-36 years old	4	1	3	Above 25,000 SR per month	1	1	3 years	14	54	48.011	Obesity range	No	No	No		0	1	1	1	1	0	1	1	6	1	0	1	0	1	0	1	1	5	1	1	1	1	1	1	0	1	7	once weekly	once weekly	Never	once or < monthly	once /day	Never
7:58:47 ص 2022/12/20	Above 46 years old	3	3	2	4,000 – less than 8,000 SR per month	1	1	5 years	23	118	16.5182	Underweight range	No	No	No		0	0	0	0	0	0	0	0	0	1	0	0	0	0	0	0	1	2	1	1	1	1	1	1	0	1	7	once /day	once /day	4-5 /weekly	4-5 /weekly	4-5 /weekly	once /day
8:08:54 ص 2022/12/20	42-46 years old	2	2	1	8,000 –less than 15,000 SR per month	1	1	3 years	3	18	Missing data	Missing data	Yes	No	No		1	1	1	1	1	1	1	1	8	1	0	0	0	1	1	1	1	5	1	1	1	1	1	1	1	1	8	2-3 weekly	2-3 weekly	once /day	more than once/day	more than once/day	once /day
8:10:04 ص 2022/12/20	28-31 years old	4	1	3	4,000 – less than 8,000 SR per month	1	1	4 years	13	I don't no	Missing data	Missing data	No	I don't no	No		0	0	0	0	0	0	0	0	0	1	1	0	0	0	0	1	1	4	1	1	1	1	1	1	0	1	7	once weekly	once weekly	2-3 weekly	2-3 weekly	once weekly	4-5 /weekly
8:37:36 ص 2022/12/20	42-46 years old	4	1	3	Above 25,000 SR per month	1	1	5 years	21	136	11.3538	Underweight range	No	No	No		0	0	0	0	0	0	0	0	0	0	0	0	0	0	0	0	0	0	0	1	1	1	1	1	0	0	5	2-3 weekly	once weekly	once or < monthly	4-5 /weekly	once weekly	Never
8:53:54 ص 2022/12/20	18-22 years old	2	1	4	15,000 – less than 25,000 SR per month	1	1	3 years	34	130	20.1183	Healthy weight range	No	No	No		1	1	1	0	0	0	0	0	3	1	0	0	0	0	0	0	0	1	1	1	1	1	1	1	1	1	8	once weekly	once weekly	once weekly	once weekly	once weekly	once weekly
9:22:38 ص 2022/12/20	18-22 years old	1	1	4	15,000 – less than 25,000 SR per month	1	1	3 years	13	67	28.9597	Overweight range	No	No	No		1	1	1	1	1	0	1	1	7	1	0	0	0	0	0	0	0	1	1	1	1	1	1	1	0	1	7	once /day	once /day	4-5 /weekly	once weekly	2-3 weekly	4-5 /weekly
9:44:23 ص 2022/12/20	18-22 years old	3	1	2	4,000 – less than 8,000 SR per month	1	1	3 years	33	110	27.2727	Overweight range	No	Yes	No		0	0	0	0	0	0	0	0	0	0	0	0	0	0	1	1	0	2	1	0	0	1	1	0	0	0	3	once /day	more than once/day	once /day	more than once/day	more than once/day	more than once/day
10:04:23 ص 2022/12/20	23-27 years old	2	1	4	Under 4,000 SR per month	1	1	3 years	12	80	18.75	Healthy weight range	I don't no	I don't no	No		0	0	0	0	0	0	0	0	0	0	0	0	0	0	0	0	0	0	1	1	1	1	1	1	0	1	7	4-5 /weekly	4-5 /weekly	once /day	2-3 weekly	once /day	2-3 weekly
10:36:56 ص 2022/12/20	23-27 years old	4	1	3	8,000 –less than 15,000 SR per month	1	2	4 years	14	110	11.5702	Underweight range	No	Yes	Yes	Social media \ Internet	1	1	1	0	0	0	1	1	5	0	0	0	0	0	0	1	1	2	0	1	1	1	1	0	0	1	5	once weekly	once weekly	4-5 /weekly	Never	4-5 /weekly	4-5 /weekly
11:26:43 ص 2022/12/20	18-22 years old	4	1	3	4,000 – less than 8,000 SR per month	1	1	4 years	24	102	23.0681	Healthy weight range	No	Yes	Yes	Ministry of Health \ Food and Drug Administration	1	1	1	1	1	0	1	0	6	0	1	0	1	1	1	1	1	6	1	1	1	1	1	1	0	1	7	4-5 /weekly	2-3 weekly	4-5 /weekly	4-5 /weekly	more than once/day	once weekly
1:10:01 م 2022/12/20	28-31 years old	2	1	3	4,000 – less than 8,000 SR per month	4	1	3 years	13	60	36.1111	Obesity range	No	No	No		0	1	0	1	1	1	1	0	5	1	0	0	0	0	0	0	1	2	1	1	1	1	1	1	1	0	7	once weekly	2-3 weekly	once weekly	once weekly	once /day	Never
1:21:54 م 2022/12/20	23-27 years old	4	1	2	8,000 –less than 15,000 SR per month	1	1	3 years	13	90	16.0494	Underweight range	No	No	Yes	Social media \ Internet	1	1	1	1	1	1	0	1	7	1	1	1	0	1	1	1	1	7	1	1	1	1	1	1	0	1	7	once /day	once /day	once /day	2-3 weekly	more than once/day	Never
1:31:09 م 2022/12/20	32-36 years old	4	2	3	Under 4,000 SR per month	1	1	5 years	20	110	16.5289	Underweight range	Yes	No	Yes	Universities \ schools	1	1	0	1	0	0	0	1	4	1	1	1	0	1	1	1	1	7	1	1	1	1	1	1	1	1	8	once or < monthly	once or < monthly	Never	once or < monthly	Never	Never
2:57:35 م 2022/12/20	23-27 years old	4	1	3	4,000 – less than 8,000 SR per month	1	1	3 years	13	96	14.1059	Underweight range	No	No	No		0	0	1	1	1	0	1	1	5	0	0	1	0	0	0	0	1	2	1	1	1	1	1	1	1	1	8	4-5 /weekly	2-3 weekly	2-3 weekly	once weekly	once weekly	once or < monthly
3:37:49 م 2022/12/20	37-41 years old	2	1	3	8,000 –less than 15,000 SR per month	4	1	5 years	17	99	17.3452	Underweight range	No	Yes	No		0	0	0	1	0	1	1	0	3	1	0	0	1	0	0	1	1	4	1	1	1	1	1	1	0	1	7	once weekly	once weekly	once or < monthly	once or < monthly	once or < monthly	once or < monthly
3:47:50 م 2022/12/20	23-27 years old	4	1	3	4,000 – less than 8,000 SR per month	1	1	3 years	12	92	14.1777	Underweight range	No	No	No		1	0	1	0	1	0	1	0	4	0	0	1	1	0	0	0	0	2	1	1	1	0	0	0	0	1	4	4-5 /weekly	once /day	once weekly	once /day	once /day	once or < monthly
5:40:51 م 2022/12/20	32-36 years old	3	1	1	4,000 – less than 8,000 SR per month	3	2	5 years	25	100	25	Healthy weight range	No	No	No		0	0	0	0	0	0	0	0	0	1	0	1	0	0	0	1	1	4	0	1	1	1	1	1	0	1	6	more than once/day	more than once/day	once /day	once /day	once /day	once /day
6:21:26 م 2022/12/20	32-36 years old	4	1	2	8,000 –less than 15,000 SR per month	1	1	3 years	9	90	11.1111	Underweight range	Yes	Yes	Yes	Social media \ Internet	1	1	1	1	0	0	1	1	6	1	0	1	0	1	1	1	1	6	1	1	1	1	1	1	1	1	8	once /day	once /day	once /day	once /day	once /day	Never
6:59:53 م 2022/12/20	23-27 years old	4	1	2	4,000 – less than 8,000 SR per month	1	2	3 years	I don't no	I don't no	Missing data	Missing data	Yes	No	No		1	1	0	0	0	0	1	0	3	1	0	1	1	0	1	1	1	6	1	1	1	1	0	1	0	0	5	2-3 weekly	2-3 weekly	2-3 weekly	4-5 /weekly	4-5 /weekly	2-3 weekly
7:03:22 م 2022/12/20	Above 46 years old	4	1	3	15,000 – less than 25,000 SR per month	1	more than 3	5 years	29	125	18.56	Healthy weight range	No	Yes	No		0	0	0	0	0	0	0	0	0	1	1	0	0	0	0	0	1	3	1	1	1	1	1	1	1	0	7	once weekly	once weekly	once weekly	once weekly	once weekly	Never
7:14:32 م 2022/12/20	37-41 years old	2	1	1	8,000 –less than 15,000 SR per month	6	1	5 years	17.9	114	13.7735	Underweight range	No	Yes	Yes	Family and friends	1	1	1	0	1	1	0	1	6	0	0	1	0	1	0	0	1	3	1	1	1	1	1	0	0	1	6	once /day	4-5 /weekly	once or < monthly	once or < monthly	once or < monthly	Never
7:19:09 م 2022/12/20	23-27 years old	4	1	2	8,000 –less than 15,000 SR per month	1	1	3 years	12	86	16.225	Underweight range	Yes	No	Yes	Social media \ Internet	1	1	1	1	0	0	1	1	6	1	1	1	0	1	1	1	1	7	1	1	1	1	1	1	0	1	7	once /day	once /day	once weekly	Never	once /day	Never
7:43:39 م 2022/12/20	28-31 years old	4	1	3	4,000 – less than 8,000 SR per month	1	1	4 years	15	80	23.4375	Healthy weight range	Yes	No	No		1	1	0	0	0	0	0	0	2	0	0	1	1	1	1	1	1	6	0	0	0	0	1	1	0	1	3	once /day	more than once/day	once /day	once /day	4-5 /weekly	4-5 /weekly
7:59:32 م 2022/12/20	28-31 years old	4	1	2	15,000 – less than 25,000 SR per month	1	3	3 years	10	20	Missing data	Missing data	No	No	Yes	Social media \ Internet	1	1	1	1	1	1	1	1	8	0	1	1	1	0	0	0	1	4	1	1	1	1	1	1	0	0	6	2-3 weekly	once weekly	2-3 weekly	once /day	once /day	once weekly
3:02:47 ص 2022/12/21	23-27 years old	4	1	3	8,000 –less than 15,000 SR per month	3	1	3 years	10	80	15.625	Underweight range	Yes	No	No		0	0	0	0	0	0	0	0	0	0	0	1	0	0	1	0	1	3	1	0	0	1	1	1	0	0	4	Never	once /day	once /day	once /day	more than once/day	Never
7:42:40 ص 2022/12/21	23-27 years old	4	1	2	8,000 –less than 15,000 SR per month	1	2	3 years	15	91	18.1138	Underweight range	Yes	No	Yes	Newspapers and magazines	1	1	1	1	1	1	1	1	8	1	0	1	0	0	1	0	1	4	1	1	1	1	1	1	1	1	8	once weekly	Never	once weekly	Never	2-3 weekly	Never
8:00:28 ص 2022/12/21	32-36 years old	4	1	2	4,000 – less than 8,000 SR per month	1	1	3 years	12	93	13.8744	Underweight range	No	No	Yes	Social media \ Internet	1	1	1	1	0	0	0	1	5	0	0	1	1	0	0	1	1	4	1	1	1	1	1	1	1	1	8	once /day	2-3 weekly	once weekly	once /day	Never	Never
9:33:11 ص 2022/12/21	Above 46 years old	4	2	2	8,000 –less than 15,000 SR per month	6	1	5 years	17	95	18.8366	Healthy weight range	No	Yes	No		1	1	0	0	0	0	1	1	4	0	0	0	0	0	1	0	1	2	1	1	1	1	1	1	0	1	7	more than once/day	more than once/day	more than once/day	more than once/day	more than once/day	Never
9:37:50 ص 2022/12/21	42-46 years old	2	1	3	8,000 –less than 15,000 SR per month	1	1	3 years	15	45	74.0741	Obesity range	No	No	Yes	Social media \ Internet	0	0	0	1	0	0	1	1	3	0	0	1	1	0	0	1	1	4	1	1	1	1	0	1	0	1	6	once or < monthly	2-3 weekly	2-3 weekly	once /day	once /day	once or < monthly
10:32:34 ص 2022/12/21	42-46 years old	4	1	2	8,000 –less than 15,000 SR per month	1	2	5 years	17	101	16.665	Underweight range	No	Yes	No		0	0	1	1	0	0	1	0	3	1	0	1	0	1	0	1	1	5	1	1	1	1	1	1	0	0	6	once /day	2-3 weekly	2-3 weekly	more than once/day	more than once/day	4-5 /weekly
11:39:25 ص 2022/12/21	32-36 years old	2	1	3	4,000 – less than 8,000 SR per month	1	1	3 years	11	93	12.7182	Underweight range	No	No	Yes	Ministry of Health \ Food and Drug Administration	1	1	1	1	0	0	1	1	6	0	1	1	0	1	1	1	1	6	0	1	1	1	1	1	1	1	7	once /day	once /day	once /day	4-5 /weekly	once /day	4-5 /weekly
12:11:01 م 2022/12/21	37-41 years old	4	1	3	15,000 – less than 25,000 SR per month	1	1	4 years	14	98	14.5773	Underweight range	No	Yes	Yes	Social media \ Internet	0	0	0	0	0	0	0	0	0	0	0	0	0	0	0	0	1	1	1	1	1	1	1	1	1	1	8	2-3 weekly	once weekly	once weekly	more than once/day	once or < monthly	once or < monthly
10:25:27 م 2022/12/21	Above 46 years old	4	1	2	8,000 –less than 15,000 SR per month	1	more than 3	5 years	50	105	45.3515	Obesity range	No	Yes	Yes	Ministry of Health \ Food and Drug Administration	1	0	0	1	0	0	1	1	4	0	0	1	0	0	1	1	0	3	1	1	1	1	1	1	1	1	8	once /day	once /day	once /day	2-3 weekly	once /day	once /day
12:37:26 ص 2022/12/22	23-27 years old	4	1	4	8,000 –less than 15,000 SR per month	1	1	3 years	15	90	18.5185	Healthy weight range	I don't no	No	Yes	Ministry of Health \ Food and Drug Administration	1	1	1	0	0	0	1	0	4	1	0	0	0	1	1	1	1	5	1	1	1	1	1	1	0	1	7	4-5 /weekly	2-3 weekly	once /day	once /day	once /day	4-5 /weekly
12:38:46 ص 2022/12/22	Above 46 years old	2	1	3	15,000 – less than 25,000 SR per month	1	1	5 years	33	140	16.8367	Underweight range	No	Yes	Yes	Ministry of Health \ Food and Drug Administration	0	0	0	1	0	0	1	1	3	1	0	1	0	0	0	1	1	4	0	1	1	1	1	1	1	1	7	4-5 /weekly	once /day	once /day	once /day	once /day	once /day
1:22:04 ص 2022/12/22	28-31 years old	4	1	3	4,000 – less than 8,000 SR per month	1	1	3 years	11	I don't no	Missing data	Missing data	No	No	Yes	Social media \ Internet	1	0	0	1	1	0	1	0	4	1	1	0	1	0	0	0	1	4	0	1	1	1	1	1	1	1	7	2-3 weekly	Never	2-3 weekly	once weekly	4-5 /weekly	Never
9:57:25 م 2022/12/22	23-27 years old	3	1	3	8,000 –less than 15,000 SR per month	2	1	3 years	12	80	18.75	Healthy weight range	No	No	No		1	1	1	1	1	0	1	1	7	0	0	0	0	0	0	1	1	2	0	1	1	0	1	1	1	1	6	once /day	Never	once or < monthly	once or < monthly	once /day	Never
2:53:24 ص 2022/12/23	28-31 years old	5	1	2	8,000 –less than 15,000 SR per month	1	1	5 years	18	100	18	Underweight range	Yes	Yes	Yes	Social media \ Internet	1	1	1	0	0	0	1	1	5	0	0	0	0	1	1	0	1	3	1	1	1	1	1	1	1	1	8	2-3 weekly	once weekly	2-3 weekly	2-3 weekly	once weekly	once weekly
9:12:08 م 2022/12/23	23-27 years old	5	1	4	8,000 –less than 15,000 SR per month	1	1	3 years	15	105	13.6054	Underweight range	No	No	Yes	Search	1	0	0	1	1	1	1	1	6	1	0	1	0	1	1	0	1	5	1	1	1	1	1	1	1	1	8	once /day	once weekly	2-3 weekly	2-3 weekly	once /day	Never
9:35:45 م 2022/12/23	28-31 years old	4	1	3	Under 4,000 SR per month	1	2	3 years	12	60	33.3333	Obesity range	No	Yes	No		0	0	0	0	0	0	0	0	0	1	0	0	1	0	0	0	0	2	1	1	1	1	1	1	0	1	7	once /day	once /day	more than once/day	more than once/day	more than once/day	more than once/day
9:38:23 م 2022/12/23	23-27 years old	2	1	3	4,000 – less than 8,000 SR per month	1	3	4 years	4	5	Missing data	Missing data	No	No	No		1	0	1	1	0	0	1	0	4	0	0	0	0	0	0	1	0	1	0	0	0	0	1	1	0	0	2	more than once/day	more than once/day	more than once/day	more than once/day	more than once/day	more than once/day
9:57:14 م 2022/12/23	18-22 years old	4	1	4	4,000 – less than 8,000 SR per month	1	1	4 years	15.4	101.6	14.9188	Underweight range	No	No	No		0	0	0	1	0	0	0	0	1	1	0	0	0	0	0	1	1	3	1	1	1	1	1	1	1	1	8	once weekly	once or < monthly	once weekly	2-3 weekly	2-3 weekly	Never
10:11:11 م 2022/12/23	23-27 years old	4	1	3	4,000 – less than 8,000 SR per month	1	2	5 years	14	99	14.2843	Underweight range	No	No	Yes	Social media \ Internet	1	1	0	0	0	0	0	1	3	1	0	1	1	1	0	1	1	6	1	1	1	1	0	1	1	1	7	2-3 weekly	2-3 weekly	2-3 weekly	2-3 weekly	once /day	once /day
10:20:24 م 2022/12/23	23-27 years old	4	1	3	4,000 – less than 8,000 SR per month	1	1	4 years	16	97	17.005	Underweight range	No	Yes	Yes	Social media \ Internet	1	1	1	1	0	0	1	1	6	0	0	0	1	0	0	0	1	2	1	1	1	1	1	1	0	1	7	once /day	2-3 weekly	once /day	2-3 weekly	4-5 /weekly	once weekly
10:36:40 م 2022/12/23	23-27 years old	4	1	4	Above 25,000 SR per month	1	1	3 years	18	34	Missing data	Missing data	No	No	No		1	1	0	1	0	1	0	0	4	0	1	0	0	0	0	0	0	1	1	1	1	0	0	0	1	0	4	once /day	once /day	more than once/day	more than once/day	more than once/day	more than once/day
12:21:53 ص 2022/12/24	23-27 years old	4	1	3	8,000 –less than 15,000 SR per month	1	2	3 years	12	85	16.609	Underweight range	No	No	Yes	Ministry of Health \ Food and Drug Administration	1	0	1	1	1	0	1	1	6	1	0	0	0	1	1	1	1	5	1	1	1	1	1	1	1	1	8	once weekly	once weekly	once weekly	once weekly	once weekly	once weekly
4:16:36 م 2022/12/24	18-22 years old	2	1	4	4,000 – less than 8,000 SR per month	1	2	5 years	16	113	12.5303	Underweight range	I don't no	No	Yes	Ministry of Health \ Food and Drug Administration	1	1	0	1	0	0	1	1	5	0	0	1	0	1	1	0	1	4	1	1	0	0	0	1	1	1	5	once /day	4-5 /weekly	4-5 /weekly	once /day	once /day	2-3 weekly
5:17:15 م 2022/12/24	23-27 years old	4	1	2	4,000 – less than 8,000 SR per month	1	1	3 years	29	75	51.5556	Obesity range	No	No	Yes	Social media \ Internet	1	1	1	1	0	0	1	1	6	1	1	1	0	1	1	0	1	6	1	1	1	1	1	1	0	0	6	once /day	once or < monthly	2-3 weekly	2-3 weekly	4-5 /weekly	Never
6:35:41 م 2022/12/24	18-22 years old	3	1	3	4,000 – less than 8,000 SR per month	1	2	3 years	32	115	24.1966	Healthy weight range	No	No	No		1	1	0	0	1	1	0	0	4	1	0	0	0	0	0	0	1	2	1	1	1	1	1	1	0	1	7	once /day	2-3 weekly	2-3 weekly	2-3 weekly	2-3 weekly	2-3 weekly
6:42:12 م 2022/12/24	Above 46 years old	1	1	3	4,000 – less than 8,000 SR per month	1	1	3 years	3	115	Missing data	Missing data	I don't no	No	No		0	0	0	0	0	0	0	0	0	1	0	0	0	0	0	0	0	1	0	0	0	0	0	0	1	0	1	once or < monthly	2-3 weekly	2-3 weekly	2-3 weekly	once weekly	once weekly
7:26:14 م 2022/12/24	32-36 years old	5	1	2	15,000 – less than 25,000 SR per month	1	1	5 years	16	100	16	Underweight range	No	No	Yes	Social media \ Internet	1	0	0	1	1	1	1	1	6	0	0	0	1	1	1	1	1	5	0	1	1	1	1	1	0	1	6	once /day	once /day	4-5 /weekly	once /day	more than once/day	Never
9:23:10 م 2022/12/24	32-36 years old	4	1	3	8,000 –less than 15,000 SR per month	2	1	5 years	13	I don't no	Missing data	Missing data	Yes	No	No		1	1	0	1	1	1	1	1	7	1	1	1	0	1	1	0	1	6	1	1	1	1	1	1	0	1	7	once /day	once weekly	once /day	once /day	Never	once weekly
9:38:35 م 2022/12/24	28-31 years old	4	1	3	8,000 –less than 15,000 SR per month	1	1	5 years	17.9	103	16.8725	Underweight range	No	Yes	No		0	0	0	0	0	0	1	0	1	1	0	1	1	0	0	0	1	4	0	1	1	1	1	1	1	0	6	2-3 weekly	2-3 weekly	2-3 weekly	2-3 weekly	once /day	Never
10:13:20 م 2022/12/24	28-31 years old	2	1	3	8,000 –less than 15,000 SR per month	3	2	5 years	13	103	12.2537	Underweight range	No	No	Yes	Social media \ Internet	1	1	0	0	1	0	1	0	4	0	0	0	1	0	0	0	1	2	1	1	1	1	1	1	0	1	7	once /day	once /day	once /day	more than once/day	more than once/day	once /day
12:52:26 ص 2022/12/25	32-36 years old	4	1	3	8,000 –less than 15,000 SR per month	1	2	4 years	18	85	24.9135	Healthy weight range	No	No	Yes	Social media \ Internet	1	1	1	1	0	0	1	1	6	0	0	1	1	1	1	1	1	6	1	1	1	0	1	1	1	0	6	once /day	once /day	2-3 weekly	2-3 weekly	2-3 weekly	Never
2:50:43 ص 2022/12/25	Above 46 years old	1	1	3	Under 4,000 SR per month	1	more than 3	3 years	13	97	13.8166	Underweight range	No	No	No		0	0	0	0	0	0	0	1	1	1	0	1	0	1	1	1	1	6	1	1	1	1	1	1	0	1	7	once /day	once weekly	4-5 /weekly	once /day	4-5 /weekly	2-3 weekly
2:58:07 ص 2022/12/25	23-27 years old	1	1	4	8,000 –less than 15,000 SR per month	1	1	3 years	14	95	15.5125	Underweight range	No	No	Yes	Social media \ Internet	1	1	0	0	0	0	0	0	2	0	1	1	1	0	0	0	1	4	1	1	1	1	1	1	0	1	7	2-3 weekly	once weekly	2-3 weekly	once weekly	once weekly	Never
9:17:24 ص 2022/12/25	32-36 years old	5	1	2	8,000 –less than 15,000 SR per month	1	2	5 years	15	130	8.87574	Underweight range	No	No	Yes	Social media \ Internet	1	0	1	0	1	1	0	1	5	1	0	1	0	0	0	1	1	4	1	1	1	1	1	1	0	0	6	once weekly	once weekly	once weekly	once or < monthly	2-3 weekly	once or < monthly
4:17:26 م 2022/12/25	23-27 years old	4	1	3	8,000 –less than 15,000 SR per month	1	2	4 years	16	100	16	Underweight range	No	No	No		1	1	0	1	1	1	1	1	7	1	0	1	0	1	1	1	1	6	1	1	1	1	1	1	0	0	6	2-3 weekly	2-3 weekly	2-3 weekly	4-5 /weekly	2-3 weekly	2-3 weekly
4:42:34 م 2022/12/25	32-36 years old	4	2	3	Under 4,000 SR per month	1	2	5 years	16	127	9.92002	Underweight range	No	No	Yes	Social media \ Internet	1	1	1	1	0	0	1	1	6	0	0	1	0	0	0	1	1	3	0	1	1	1	1	1	1	1	7	4-5 /weekly	once weekly	once weekly	4-5 /weekly	4-5 /weekly	Never
5:59:30 م 2022/12/25	28-31 years old	4	1	3	8,000 –less than 15,000 SR per month	1	1	4 years	20	106	17.7999	Underweight range	No	No	Yes	Family and friends	1	1	0	1	0	0	0	1	4	0	0	1	0	0	0	1	1	3	1	1	1	1	1	1	0	1	7	once weekly	once weekly	once weekly	once weekly	once or < monthly	Never
8:42:48 ص 2022/12/26	18-22 years old	4	2	3	Under 4,000 SR per month	1	1	3 years	30	120	20.8333	Healthy weight range	No	No	Yes	Ministry of Health \ Food and Drug Administration	1	1	1	1	1	1	1	1	8	0	1	1	1	1	1	1	1	7	1	1	1	1	1	0	0	1	6	more than once/day	once /day	once /day	once /day	once /day	once /day
12:53:18 م 2022/12/26	37-41 years old	5	1	2	8,000 –less than 15,000 SR per month	1	2	4 years	1	20	Missing data	Missing data	Yes	No	Yes	Ministry of Health \ Food and Drug Administration	1	1	0	1	0	1	1	1	6	1	1	1	0	1	1	1	1	7	1	1	1	1	1	1	1	1	8	more than once/day	once /day	once /day	once /day	once /day	once /day
6:36:16 م 2022/12/26	28-31 years old	4	1	3	8,000 –less than 15,000 SR per month	3	1	3 years	16	95	17.7285	Underweight range	I don't no	No	Yes	Social media \ Internet	1	1	1	1	1	0	1	0	6	0	0	0	0	1	0	0	1	2	1	1	1	1	1	1	1	1	8	2-3 weekly	once weekly	2-3 weekly	4-5 /weekly	once or < monthly	once or < monthly
7:09:57 م 2022/12/26	42-46 years old	4	1	3	8,000 –less than 15,000 SR per month	3	1	4 years	15	98	15.6185	Underweight range	No	No	No		0	0	0	1	0	0	1	1	3	1	0	1	1	0	0	1	1	5	1	1	1	1	1	1	1	1	8	once /day	2-3 weekly	2-3 weekly	4-5 /weekly	once /day	once or < monthly
7:50:19 م 2022/12/26	37-41 years old	4	1	3	8,000 –less than 15,000 SR per month	3	1	4 years	15	98	15.6185	Underweight range	No	No	Yes	Social media \ Internet	1	1	1	1	0	0	1	1	6	1	0	1	1	0	0	1	1	5	1	1	1	1	1	1	0	1	7	once /day	2-3 weekly	2-3 weekly	2-3 weekly	2-3 weekly	once or < monthly
7:59:49 م 2022/12/26	28-31 years old	3	2	3	8,000 –less than 15,000 SR per month	1	more than 3	5 years	11	100	11	Underweight range	I don't no	Yes	No		1	1	1	1	1	0	1	1	7	0	0	1	1	0	0	1	1	4	0	1	1	0	1	1	1	1	6	once /day	once /day	once /day	once or < monthly	once /day	once or < monthly
8:49:42 م 2022/12/26	37-41 years old	1	1	3	Under 4,000 SR per month	1	2	3 years	17	90	20.9877	Healthy weight range	No	No	Yes	Social media \ Internet	1	1	1	1	0	0	0	1	5	0	0	0	0	1	1	1	1	4	0	1	1	1	1	1	1	1	7	2-3 weekly	once weekly	once weekly	4-5 /weekly	4-5 /weekly	once weekly
9:07:10 م 2022/12/26	32-36 years old	4	1	3	15,000 – less than 25,000 SR per month	1	2	3 years	15.7	70	32.0408	Obesity range	No	No	Yes	Family and friends	1	1	1	1	0	0	1	1	6	1	0	1	0	1	1	1	1	6	1	1	1	1	1	1	0	1	7	once /day	2-3 weekly	4-5 /weekly	more than once/day	Never	once or < monthly
10:43:58 م 2022/12/26	32-36 years old	4	2	3	Under 4,000 SR per month	1	1	5 years	14	0	Missing data	Missing data	No	Yes	Yes	Social media \ Internet	1	1	1	1	1	0	1	1	7	1	0	1	0	0	0	1	1	4	1	1	1	1	1	1	0	1	7	2-3 weekly	2-3 weekly	4-5 /weekly	once /day	once /day	once weekly
10:46:04 م 2022/12/26	18-22 years old	1	1	4	4,000 – less than 8,000 SR per month	1	2	4 years	16.4	101.6	15.8875	Underweight range	No	No	Yes	Social media \ Internet	1	1	1	1	1	1	0	1	7	0	0	1	1	1	0	0	1	4	0	1	0	1	0	1	1	1	5	once /day	4-5 /weekly	4-5 /weekly	once /day	once /day	2-3 weekly
11:30:55 م 2022/12/26	37-41 years old	2	1	3	8,000 –less than 15,000 SR per month	6	1	3 years	13	98	13.536	Underweight range	No	No	Yes	Social media \ Internet	1	1	1	1	1	1	0	1	7	0	0	0	0	1	0	1	1	3	1	1	1	1	1	1	1	1	8	once /day	2-3 weekly	once or < monthly	4-5 /weekly	4-5 /weekly	once /day
12:11:30 ص 2022/12/27	28-31 years old	4	1	3	8,000 –less than 15,000 SR per month	1	1	5 years	18	50	72	Obesity range	Yes	Yes	No		0	0	0	1	1	1	1	1	5	0	0	1	0	1	1	1	1	5	1	1	1	0	0	1	0	1	5	2-3 weekly	4-5 /weekly	4-5 /weekly	4-5 /weekly	more than once/day	once /day
12:15:25 ص 2022/12/27	32-36 years old	1	1	1	8,000 –less than 15,000 SR per month	1	2	3 years	19	90	23.4568	Healthy weight range	No	Yes	Yes	Ministry of Health \ Food and Drug Administration	0	1	1	1	0	0	0	0	3	0	0	1	1	0	0	1	0	3	0	1	1	1	1	1	0	1	6	more than once/day	more than once/day	once /day	once /day	once /day	more than once/day
12:32:37 ص 2022/12/27	32-36 years old	4	1	3	4,000 – less than 8,000 SR per month	1	1	5 years	22	26	Missing data	Missing data	No	Yes	No		1	1	1	1	0	1	1	1	7	0	0	1	0	0	0	0	0	1	0	0	1	0	0	0	1	0	2	once /day	once /day	once /day	once /day	once /day	once /day
1:02:13 ص 2022/12/27	28-31 years old	4	1	1	15,000 – less than 25,000 SR per month	3	2	5 years	19	108	16.2894	Underweight range	Yes	No	Yes	Family and friends	1	1	1	1	1	1	1	1	8	1	1	0	0	1	1	1	1	6	1	1	1	1	1	1	1	1	8	once or < monthly	Never	once weekly	once weekly	2-3 weekly	Never
1:56:38 ص 2022/12/27	28-31 years old	1	1	3	8,000 –less than 15,000 SR per month	3	1	5 years	18	110.5	14.7417	Underweight range	Yes	Yes	No		0	0	0	0	0	0	0	0	0	0	0	1	0	0	1	1	1	4	0	1	1	0	1	1	0	0	4	once /day	2-3 weekly	2-3 weekly	2-3 weekly	2-3 weekly	2-3 weekly
2:02:33 ص 2022/12/27	23-27 years old	4	1	3	4,000 – less than 8,000 SR per month	1	1	3 years	14	100	14	Underweight range	No	No	No		1	1	1	1	0	0	1	0	5	1	0	1	0	1	0	0	1	4	1	1	1	1	1	1	1	0	7	2-3 weekly	once or < monthly	once weekly	once or < monthly	once weekly	Never
8:51:59 ص 2022/12/27	18-22 years old	3	2	4	Above 25,000 SR per month	6	more than 3	5 years	67	130	39.645	Obesity range	Yes	No	No		0	0	0	0	1	0	1	0	2	0	1	0	1	1	1	1	0	5	0	0	1	1	1	1	1	0	5	once weekly	once or < monthly	2-3 weekly	once /day	more than once/day	4-5 /weekly
1:44:22 م 2022/12/27	37-41 years old	4	1	2	15,000 – less than 25,000 SR per month	1	1	5 years	18	109	15.1502	Underweight range	No	No	Yes	Universities \ schools	1	1	0	1	1	1	1	1	7	1	0	0	1	1	1	1	1	6	1	1	1	1	1	1	1	0	7	2-3 weekly	2-3 weekly	4-5 /weekly	once /day	once /day	once weekly
6:36:55 م 2022/12/27	42-46 years old	4	1	2	15,000 – less than 25,000 SR per month	1	1	5 years	18	115	13.6106	Underweight range	No	No	Yes	Family and friends	1	1	0	1	0	0	1	0	4	0	0	0	0	0	0	0	1	1	0	0	0	0	0	0	0	1	1	once /day	once /day	2-3 weekly	once weekly	Never	once or < monthly
6:59:15 م 2022/12/27	42-46 years old	4	1	2	8,000 –less than 15,000 SR per month	1	1	5 years	16	103	15.0815	Underweight range	I don't no	No	Yes	Social media \ Internet	1	0	1	1	0	0	1	1	5	0	0	1	0	1	0	1	1	4	1	1	1	1	1	1	0	0	6	2-3 weekly	once or < monthly	4-5 /weekly	once weekly	Never	2-3 weekly
7:08:11 م 2022/12/27	37-41 years old	4	1	2	8,000 –less than 15,000 SR per month	1	2	3 years	11	84	15.5896	Underweight range	I don't no	No	No		1	1	1	1	1	1	1	1	8	0	1	1	1	1	1	1	1	7	1	1	1	1	1	1	0	1	7	4-5 /weekly	once weekly	2-3 weekly	once /day	Never	4-5 /weekly
9:21:59 م 2022/12/27	32-36 years old	4	1	2	8,000 –less than 15,000 SR per month	1	1	3 years	13	80	20.3125	Healthy weight range	No	No	No		0	0	1	1	0	0	1	0	3	0	0	1	0	0	0	0	1	2	0	1	1	1	1	1	0	1	6	once /day	once weekly	once or < monthly	Never	once /day	Never
6:25:29 م 2022/12/28	Above 46 years old	1	1	3	4,000 – less than 8,000 SR per month	1	1	4 years	10	90	12.3457	Underweight range	No	No	Yes	Ministry of Health \ Food and Drug Administration	1	1	1	1	0	0	0	0	4	1	0	0	0	0	0	0	0	1	1	1	1	1	1	1	1	0	7	once or < monthly	once or < monthly	once or < monthly	4-5 /weekly	once /day	2-3 weekly
9:59:45 م 2022/12/28	28-31 years old	3	2	3	4,000 – less than 8,000 SR per month	1	2	5 years	22	118	15.8001	Underweight range	No	Yes	No		0	0	0	1	1	0	1	1	4	1	0	1	0	1	0	0	1	4	1	1	1	1	0	1	0	1	6	once /day	4-5 /weekly	once /day	once /day	Never	Never
12:39:51 م 2022/12/29	28-31 years old	4	1	2	8,000 –less than 15,000 SR per month	1	1	4 years	16	105	14.5125	Underweight range	Yes	No	Yes	Ministry of Health \ Food and Drug Administration	1	1	0	1	1	0	1	1	6	0	1	0	0	0	0	1	1	3	1	1	1	1	1	1	0	0	6	2-3 weekly	once weekly	once or < monthly	Never	Never	Never
12:41:34 م 2022/12/29	23-27 years old	4	1	2	4,000 – less than 8,000 SR per month	1	3	5 years	19	108	16.2894	Underweight range	No	No	Yes	Family and friends	1	1	1	1	1	0	1	0	6	0	0	0	0	0	0	0	1	1	1	1	1	1	1	1	0	1	7	once /day	once /day	2-3 weekly	once /day	once /day	2-3 weekly
2:09:41 م 2022/12/29	42-46 years old	4	1	3	Above 25,000 SR per month	1	more than 3	5 years	30	139	15.5271	Underweight range	No	No	Yes	Social media \ Internet	1	1	0	0	0	0	0	0	2	0	0	0	0	0	0	0	1	1	0	1	1	1	1	1	0	1	6	4-5 /weekly	once /day	once /day	once /day	more than once/day	4-5 /weekly
3:31:37 م 2022/12/29	28-31 years old	4	1	2	Above 25,000 SR per month	1	1	3 years	13.5	98	14.0566	Underweight range	Yes	No	Yes	Social media \ Internet	1	1	0	1	0	1	1	1	6	1	1	1	0	0	0	1	1	5	1	1	1	1	1	1	0	0	6	2-3 weekly	once or < monthly	2-3 weekly	Never	once or < monthly	Never
8:58:52 م 2022/12/29	32-36 years old	4	1	2	8,000 –less than 15,000 SR per month	3	1	3 years	12	85	16.609	Underweight range	Yes	No	No		0	0	0	0	0	0	1	1	2	1	0	1	1	1	1	1	1	7	1	1	1	1	1	1	0	1	7	2-3 weekly	2-3 weekly	once or < monthly	2-3 weekly	2-3 weekly	once or < monthly
9:04:18 م 2022/12/29	37-41 years old	4	1	2	Above 25,000 SR per month	3	1	4 years	14	30	Missing data	Missing data	No	No	Yes	Ministry of Health \ Food and Drug Administration	1	1	1	1	1	1	1	1	8	1	1	0	0	1	1	1	1	6	1	1	1	1	1	1	1	1	8	once weekly	once or < monthly	once /day	2-3 weekly	Never	Never
9:23:13 م 2022/12/29	37-41 years old	2	1	3	Under 4,000 SR per month	1	1	4 years	14	86	18.9292	Healthy weight range	Yes	No	No	Newspapers and magazines	0	0	0	0	0	0	0	0	0	1	0	1	0	1	1	0	1	5	0	1	0	0	0	0	0	0	1	2-3 weekly	more than once/day	more than once/day	more than once/day	more than once/day	more than once/day
9:52:06 م 2022/12/29	37-41 years old	4	1	2	15,000 – less than 25,000 SR per month	3	1	3 years	15	90	18.5185	Healthy weight range	No	No	No		1	0	0	1	1	0	0	1	4	1	0	1	0	0	0	0	0	2	1	1	1	0	1	1	0	1	6	more than once/day	more than once/day	more than once/day	more than once/day	more than once/day	more than once/day
10:06:10 م 2022/12/29	28-31 years old	2	1	3	4,000 – less than 8,000 SR per month	1	more than 3	5 years	18	33	Missing data	Missing data	No	No	No		0	1	0	1	1	1	1	1	6	1	1	1	0	0	0	0	1	4	1	1	1	1	0	1	1	0	6	2-3 weekly	once weekly	once weekly	once /day	once /day	2-3 weekly
12:07:28 ص 2022/12/30	42-46 years old	4	1	3	15,000 – less than 25,000 SR per month	1	1	5 years	24	112	19.1327	Healthy weight range	No	Yes	Yes	Social media \ Internet	1	1	0	1	1	1	1	1	7	1	0	1	0	1	1	1	1	6	1	1	1	1	1	1	1	0	7	once /day	once /day	once /day	once /day	once /day	once /day
12:16:31 ص 2022/12/30	18-22 years old	5	1	1	Above 25,000 SR per month	1	2	4 years	18	I don't no	Missing data	Missing data	No	No	No		0	0	1	1	1	0	1	1	5	0	0	0	0	0	1	0	1	2	1	1	1	1	1	1	0	1	7	2-3 weekly	2-3 weekly	2-3 weekly	2-3 weekly	4-5 /weekly	Never
12:28:28 ص 2022/12/30	18-22 years old	4	1	4	4,000 – less than 8,000 SR per month	1	1	5 years	20	110	16.5289	Underweight range	No	Yes	No		1	1	1	1	0	0	0	0	4	1	0	0	1	0	0	1	1	4	1	1	1	1	1	1	0	1	7	once /day	once /day	once /day	more than once/day	more than once/day	once /day
11:23:19 ص 2022/12/30	37-41 years old	4	1	3	4,000 – less than 8,000 SR per month	6	1	5 years	15	90	18.5185	Healthy weight range	Yes	No	No		0	0	0	1	0	0	0	1	2	1	0	0	0	1	1	0	1	4	1	1	0	0	0	1	0	1	4	once /day	once /day	2-3 weekly	2-3 weekly	more than once/day	once or < monthly
11:59:14 ص 2022/12/30	23-27 years old	4	1	2	8,000 –less than 15,000 SR per month	1	1	4 years	18	120	12.5	Underweight range	No	I don't no	No		1	1	1	1	1	1	1	1	8	1	1	1	0	1	1	1	1	7	1	1	1	0	1	1	0	0	5	once /day	2-3 weekly	once weekly	once /day	4-5 /weekly	Never
7:43:01 م 2022/12/30	32-36 years old	3	2	2	4,000 – less than 8,000 SR per month	1	more than 3	5 years	33	140	16.8367	Underweight range	No	Yes	Yes	Ministry of Health \ Food and Drug Administration	1	1	0	0	0	0	0	0	2	1	0	1	0	1	1	1	1	6	1	1	1	1	1	1	0	1	7	2-3 weekly	2-3 weekly	once or < monthly	2-3 weekly	2-3 weekly	once or < monthly
7:54:09 م 2022/12/30	18-22 years old	4	1	4	8,000 –less than 15,000 SR per month	1	2	3 years	12	I don't no	Missing data	Missing data	No	No	No		1	1	1	1	1	1	1	1	8	0	0	0	0	0	0	0	1	1	1	0	1	1	0	0	0	1	4	once /day	once or < monthly	once /day	once or < monthly	more than once/day	once /day
7:55:22 م 2022/12/30	28-31 years old	3	1	2	4,000 – less than 8,000 SR per month	1	2	4 years	20	94	22.6347	Healthy weight range	No	No	Yes	Family and friends	1	1	1	1	1	1	1	1	8	1	1	1	0	1	1	0	1	6	1	1	1	1	1	1	1	1	8	Never	Never	once or < monthly	Never	once weekly	Never
8:12:09 م 2022/12/30	18-22 years old	4	1	2	Under 4,000 SR per month	1	2	4 years	30	135	16.4609	Underweight range	No	Yes	Yes	Ministry of Health \ Food and Drug Administration	1	0	1	1	1	0	0	1	5	0	1	0	0	0	0	0	1	2	1	1	1	1	1	1	1	1	8	once /day	4-5 /weekly	once /day	once /day	more than once/day	once /day
8:18:25 م 2022/12/30	28-31 years old	5	1	2	8,000 –less than 15,000 SR per month	1	3	5 years	20.5	107.8	17.6407	Underweight range	No	No	Yes	Social media \ Internet	1	1	0	0	1	1	1	1	6	0	0	1	1	1	1	0	1	5	1	1	1	1	1	1	1	1	8	4-5 /weekly	once weekly	2-3 weekly	2-3 weekly	4-5 /weekly	2-3 weekly
9:46:16 م 2022/12/30	28-31 years old	1	1	3	4,000 – less than 8,000 SR per month	1	1	3 years	15	90	18.5185	Healthy weight range	Yes	No	Yes	Universities \ schools	1	1	1	1	1	1	1	1	8	0	1	1	1	0	0	0	1	4	1	1	1	1	1	1	0	1	7	2-3 weekly	once or < monthly	once weekly	once or < monthly	2-3 weekly	Never
9:58:19 م 2022/12/30	23-27 years old	4	1	3	8,000 –less than 15,000 SR per month	1	1	3 years	14	75	24.8889	Healthy weight range	No	No	No		1	1	0	0	0	0	1	1	4	0	1	0	0	1	1	0	1	4	1	1	1	1	1	1	1	1	8	once /day	once weekly	4-5 /weekly	once /day	2-3 weekly	once weekly
11:39:12 م 2022/12/30	23-27 years old	4	1	3	Above 25,000 SR per month	1	1	3 years	13	95	14.4044	Underweight range	No	No	Yes	Social media \ Internet	1	1	1	1	1	1	1	1	8	0	1	0	0	1	1	1	1	5	1	1	1	1	1	1	0	1	7	once weekly	once weekly	once weekly	2-3 weekly	2-3 weekly	once or < monthly
2:00:47 ص 2022/12/31	37-41 years old	5	1	3	15,000 – less than 25,000 SR per month	1	2	3 years	20	109	16.8336	Underweight range	I don't no	No	Yes	Social media \ Internet	1	1	1	1	0	0	1	0	5	0	0	0	0	0	1	1	1	3	1	1	1	1	1	1	1	1	8	Never	Never	once or < monthly	once or < monthly	once or < monthly	Never
11:20:50 م 2022/12/31	18-22 years old	2	1	4	4,000 – less than 8,000 SR per month	1	1	3 years	15	70	30.6122	Obesity range	No	No	Yes	Ministry of Health \ Food and Drug Administration	1	1	1	1	1	0	1	1	7	1	1	1	0	0	0	1	1	5	1	1	1	1	1	1	1	1	8	2-3 weekly	once weekly	2-3 weekly	once weekly	2-3 weekly	Never
																								TOTAL:	2529								TOTAL:	2107								TOTAL:	3302
[truncated: 9 more columns]

## Sheet: scoring
							Meaning of number on demographic characteristics questions:
									2-Mother's education level:
										Less than high school = 1
										High school = 2
										Diploma = 3
										Bachelor = 4
										Postgraduate studies = 5
									3- Marital status of mother:
										Married = 1
										Divorced = 2
										Widow = 3
									4- Mother Occupation status:
										businesswoman = 1
										Employee = 2
										Housewife = 3
										Students = 4
										Retired = 5
									6- The city you live (in west region):
										Jeddah city = 1
										Yanbu city = 2
										Makkah city = 3
										Medina city = 4
										Bahrah City (in Makkah region) = 5
										Taif city = 6
										Rabigh City (in Makkah region) = 7
										Godaid Village (in Makkah region) = 8
										Al-Jumum City (in Makkah region) = 9
										Al-Barza village (in Makkah region) = 10
										Khulais City (in Makkah region) = 11
										Al-Kamil City (in Makkah region) = 12
										Al-Leith City (in Makkah region) = 13
										Scoring from all qustion no. 3 to 10
					Mothers’ knowledge toward food additives:					Yes = 1
										No = 0
										I don't know = 0
					Mothers’ attuited toward food additives:					Scoring from qustion no. 1 to 8
									1- Do you allow your child to eat foods that contain food additives?
										No = 1
										Yes = 0
										I don't care = 0
									2- Do you have enough nutritional information to select the suitable food product including food additives?
										Yes =1
										No= 0
										Maybe = 0
									3- Food containing artificial additives is more attractive for consumers:
										Yes = 1
										No= 0
										I don't know = 0
									4- The approved food additives in food products in Saudi Arabia are safe of health?
										Yes = 1
										No = 0
										I don't know = 0
									5- I am worried for my child to have diseases after consumption food with additives:
										Yes = 1
										No = 0
										Sometime = 0
									6- I am afraid for my child to get allergy after consumption food with additives:
										Yes= 1
										No = 0
										Sometime = 0
									7- Are you willing to pay more money for food without additives?
										Yes =1
										No= 0
										Maybe = 0
									8- Do you think that it is essential to prepare awareness programs for our community about food additives?
										Yes = 1
										No = 0
										I don't care = 0
					Mothers purchasing behavior:					Scoring from qustion no. 1 to 8
									1- When buying food products for my children, I pay attention to information on food label related to additives as ingredients:
										Sometime = 1
										Always = 1
										Rarely = 0
										Never = 0
									2- I avoid purchasing food products that contain high sweeteners for my children such as canned juices :
										Sometime = 1
										Always = 1
										Rarely = 0
										Never = 0
									3- I avoid purchasing food products that contain high colorings for my children such as lollipops sweet and candies:
										Sometime = 1
										Always = 1
										Rarely = 0
										Never = 0
									4- I avoid purchasing food products that contain high flavors for my children such as potato chips:
										Sometime = 1
										Always = 1
										Rarely = 0
										Never = 0
									5- I avoid purchasing food products that contain monosodium glutamate (MSG) such as instant soup:
										Sometime = 1
										Always = 1
										Rarely = 0
										Never = 0
									6- l am keening to select natural products for my children:
										Sometime = 1
										Always = 1
										Rarely = 0
										Never = 0
									7- My children can choose any food and beverages they want it :
										Rarely = 1
										Never = 1
										Sometime = 0
										Always = 0
									8- I do not consult my children when I buy food:
										Sometime = 1
										Always = 1
										Rarely = 0
										Never = 0
