# Supplementary material for: Knowledge, attitude and purchasing behavior of Saudi mothers towards food additives and dietary pattern of preschool children
Source: PeerJ journal article supplement (doi:10.7717/peerj.18223), 2024-10-10
Supplement: Survey_questions.pdf [file Survey_questions.pdf]

# **Survey about Knowledge, Attitude and Purchasing Behavior of Saudi Mothers Towards Food Additives and Dietary Pattern of Preschool Children:**

## **❖ Demographic characteristics:**

### **1- Age of mother:**

- 18 – 22 years old
- 23 – 27 years old
- 28 – 31 years old
- 32 – 36 years old
- 37 – 41 years old
- 42 – 46 years old
- Above 46 years old

### **2- Mother's education level:**

- Less than high school
- High school
- Diploma
- Bachelor
- Postgraduate studies

### **3- Marital status of mother:**

- Married
- Divorced
- Widow

### **4- Mother Occupation status:**

- Businesswoman
- Employee
- Housewife
- Students
- Retired

### **5- Economic situations:**

- Under 4,000 SR per month
- 4,000 – less than 8,000 SR per month
- 8,000 –less than 15,000 SR per month

- 15,000 – less than 25,000 SR per month
- Above 25,000 SR per month

6- The city you live (in west region):

- Makkah city
- Medina city
- Jeddah city
- Yanbu city
- Taif city
- Others

7- Number of preschool children (from 3 to 5 years):

- 1
- 2
- 3
- More than 3

8- How old is your child? If you have more than one child from 3 to 5 years old, choose the oldest child to answer this survey:

- 3 years
- 4 years
- 5 years

9- Child's weight in kilograms (kg):

.....

10- Child's height in centimeters (cm):

.....

11- Does your child suffer from food allergies?

- Yes
- No
- I don't know

12- Does your child suffer from tooth decay?

- Yes
- No
- I don't know

## ❖ Mothers' knowledge toward food additives:

1- Have you ever heard about food additives?

- Yes
- No
- I don't know

2- If you answer yes, what are your sources of information about food additives?

- Ministry of Health \ Food and Drug Administration
- Universities \ schools
- Social media \ Internet
- TV/radio
- Newspapers and magazines
- Conferences and symposia
- Family and friends
- Others

3- Food additives are materials added to processed food to improve the flavor, color, texture and to extend preservation period:

- Yes
- No
- I don't know

4- The types of additives in foods are preservatives, coloring agents, antioxidants, and emulsifiers:

- Yes
- No
- I don't know

5- Food factories adhere to certain regulations that are globally specific to the proportions of food additives authorized to be used in their products:

- Yes
- No
- I don't know

6- Food factories in Saudi Arabia put a clear list of additives in their food products:

- Yes

- No
- I don't know

7- Do you know that the kind of food additives be written in the guidance card on the package and symbolized by the letter E?

- Yes
- No
- I don't know

8- The numbers after the letter E, such as (E129), symbolize the type of food additive present in the product:

- Yes
- No
- I don't know

9- Food Additives in processed food products are divided into natural and artificial additives

- Yes
- No
- I don't know

10- High consumption of artificial food additives may cause hyperactivity for children and other dangerous disease

- Yes
- No
- I don't know

### ❖ **Mothers' attitude toward food additives:**

1- Do you allow your child to eat foods that contain food additives?

- Yes
- No
- I don't care

2- Do you have enough nutritional information to select the suitable food product including food additives?

- Yes
- No
- Maybe

- 3- Food containing artificial additives is more attractive for consumers:
- Yes
  - No
  - I don't know
- 4- The approved food additives in food products in Saudi Arabia are safe of health?
- Yes
  - No
  - I don't know
- 5- I am worried for my child to have diseases after consumption food with additives:
- Yes
  - No
  - Sometime
- 6- I am afraid for my child to get allergy after consumption food with additives:
- Yes
  - No
  - Sometime
- 7- Are you willing to pay more money for food without additives?
- Yes
  - No
  - Maybe
- 8- Do you think that it is essential to prepare awareness programs for our community about food additives?
- Yes
  - No
  - I don't care

### ❖ Mothers purchasing behavior

- 1- When buying food products for my children, I pay attention to information on food label related to additives as ingredients:
- Always

- Sometime
- Rarely
- Never

2- I avoid purchasing food products that contain high sweeteners for my children such as canned juices :

- Always
- Sometime
- Rarely
- Never

3- I avoid purchasing food products that contain high colorings for my children such as lollipops sweet and candies:

- Always
- Sometime
- Rarely
- Never

4- I avoid purchasing food products that contain high flavors for my children such as potato chips:

- Always
- Sometime
- Rarely
- Never

5- I avoid purchasing food products that contain monosodium glutamate (MSG) such as instant soup:

- Always
- Sometime
- Rarely
- Never

6- I am keening to select natural products for my children:

- Always
- Sometime
- Rarely
- Never

7- My children can choose any food and beverages they want it :

- Always
- Sometime
- Rarely
- Never

8- I do not consult my children when I buy food:

- Always
- Sometime
- Rarely
- Never

### ❖ Dietary pattern of preschool children:

| Food item                                                                                | more than<br>once/day | once<br>/day | 4-5<br>/weekly | 2-3<br>weekly | once<br>weekly | once or <<br>monthly | No |
|------------------------------------------------------------------------------------------|-----------------------|--------------|----------------|---------------|----------------|----------------------|----|
| <b>biscuits &amp; crackers</b><br>(corn and wheat crackers<br>and all kinds of biscuits) |                       |              |                |               |                |                      |    |
| <b>Potato chips</b> (all kinds<br>of chips such as Cheetos,<br>Lays, Doritos, etc.)      |                       |              |                |               |                |                      |    |
| <b>Cakes</b> (Pancake,<br>cheesecake, chocolate<br>cake)                                 |                       |              |                |               |                |                      |    |
| <b>Breakfast cereals</b> (all<br>kinds of corn flakes)                                   |                       |              |                |               |                |                      |    |
| <b>Fortified dairy<br/>products</b> (yogurt with<br>berries, chocolate milk,<br>etc.)    |                       |              |                |               |                |                      |    |
| <b>Chewing gums</b><br>(Bubble gum, ball gum,<br>etc)                                    |                       |              |                |               |                |                      |    |
| <b>Juices</b> (canned juices<br>such as Suntop, Nectar,<br>etc.)                         |                       |              |                |               |                |                      |    |
| <b>Soft beverages</b> (Pepsi,<br>7UP, etc.)                                              |                       |              |                |               |                |                      |    |
| <b>Candies</b> (lollipops, etc.)                                                         |                       |              |                |               |                |                      |    |
| <b>Chocolate</b> (of all kinds)                                                          |                       |              |                |               |                |                      |    |
| <b>Ice-cream</b> (Quality,<br>Saudia, berries, fruits,<br>chocolate, etc.)               |                       |              |                |               |                |                      |    |
| <b>Jelly</b> (sweet or sour jelly)                                                       |                       |              |                |               |                |                      |    |

|                                                                    |  |  |  |  |  |  |  |
|--------------------------------------------------------------------|--|--|--|--|--|--|--|
| <b>Processed meat</b><br>(sausage, mortadella,<br>chicken nuggets) |  |  |  |  |  |  |  |
| <b>Sauces</b><br>(mayonnaise, ketchup,<br>ranch dressing, etc.)    |  |  |  |  |  |  |  |
| <b>Instant noodles and<br/>soups</b> (Indomie, Maggi,<br>etc.)     |  |  |  |  |  |  |  |
